# Supplementary material for: Colour-tuneable solid-state fluorescence of crystalline powders formed from push–pull substituted 2,5-diphenyl-stilbenes
Source: Royal Society of Chemistry journal article supplement (doi:10.1039/d2ra05593g), 2022-01-01
Supplement: d2ra05593g1.pdf [file d2ra05593g1.pdf]

## Supporting information

### **Color tunable solid-state fluorescence of polycrystalline materials based on push-pull substituted 2,5-diphenyl-stilbene building block.**

Karel Pauk <sup>a</sup>, Stanislav Luňák Jr. <sup>b</sup>, Aleš Růžička <sup>c</sup>, Aneta Marková <sup>b</sup>, Kateřina Teichmanová <sup>a</sup>, Anna Mausová <sup>a</sup>, Matouš Kratochvíl <sup>b</sup>, Rastislav Smolka <sup>b</sup>, Tomáš Mikysek <sup>d</sup>, Martin Weiter <sup>b</sup>, Aleš Imramovský <sup>a\*</sup>, Martin Vala <sup>b\*</sup>

## Table of Contents

|                                         |     |
|-----------------------------------------|-----|
| General experimental methods            | S3  |
| NMR spectra of selected compounds       | S10 |
| Electrochemical measurements            | S38 |
| Single crystal XRD                      | S43 |
| Spectral and photophysical measurements | S48 |

## General experimental methods:

All reagents and solvents were purchased from commercial sources (Sigma–Aldrich, Fluorochem, Acros Organics, TCI Europe, Merck, and Lach-Ner). Commercial grade reagents were used without further purification. Reactions were monitored by using thin-layer chromatography (TLC) plates coated with 0.2 mm silica gel (60 F254, Merck). TLC plates were visualized by using UV irradiation (254 nm). All melting points were determined by using a Melting Point B-540 apparatus (Büchi, Switzerland) and are given in their uncorrected form. The IR spectra were recorded with a Nicolet iS50 using the ATR technique. The NMR spectra were measured in CDCl<sub>3</sub> and CD<sub>2</sub>Cl<sub>2</sub>-d<sub>2</sub> solutions at ambient temperature with a Bruker Avance™ III 400 spectrometer at frequencies 400 MHz (1H) and 100.26 MHz (13C), or with a Bruker Ascend™ 500 spectrometer at frequencies 500.13 MHz (1H) and 125.76 MHz (13C{1H}). The chemical shifts (δ) reported in the Supporting Information are given in ppm and are related to the following residual solvent peaks: @4.79 (D<sub>2</sub>O-d<sub>2</sub>), @5.32 (CD<sub>2</sub>Cl<sub>2</sub>-d<sub>2</sub>), @7.27 (CDCl<sub>3</sub>). Tetramethylsilane (TMS) was used as an internal standard. The coupling constants (*J*) are reported in Hz. Elemental analyses (C, H, and N) were performed with an automatic microanalyzer (Flash 2000 Organic elemental analyzer). Mass spectrometry with high resolution was determined by the “dried droplet” method using a MALDI mass spectrometer LTQ Orbitrap XL (Thermo Fisher Scientific) equipped with a nitrogen UV laser (337 nm, 60 Hz). Spectra were measured in positive ion mode and in regular mass extent with a resolution of 100000 at a mass-to-charge ratio (*m/z*) of 400, with 2,5-dihydrobenzoic acid (DBH) used as the matrix. The FTIR spectra were recorded with a FTIR Nicolet iS50 using the ATR technique. The synthetic procedure for compounds **1**, **DPA-DPS-CHO** and **DPA-DPS-DCV** was described in K. Pauk, et. al., *Chem. Eur. J.*, 2021, **27**, 4341-4348.

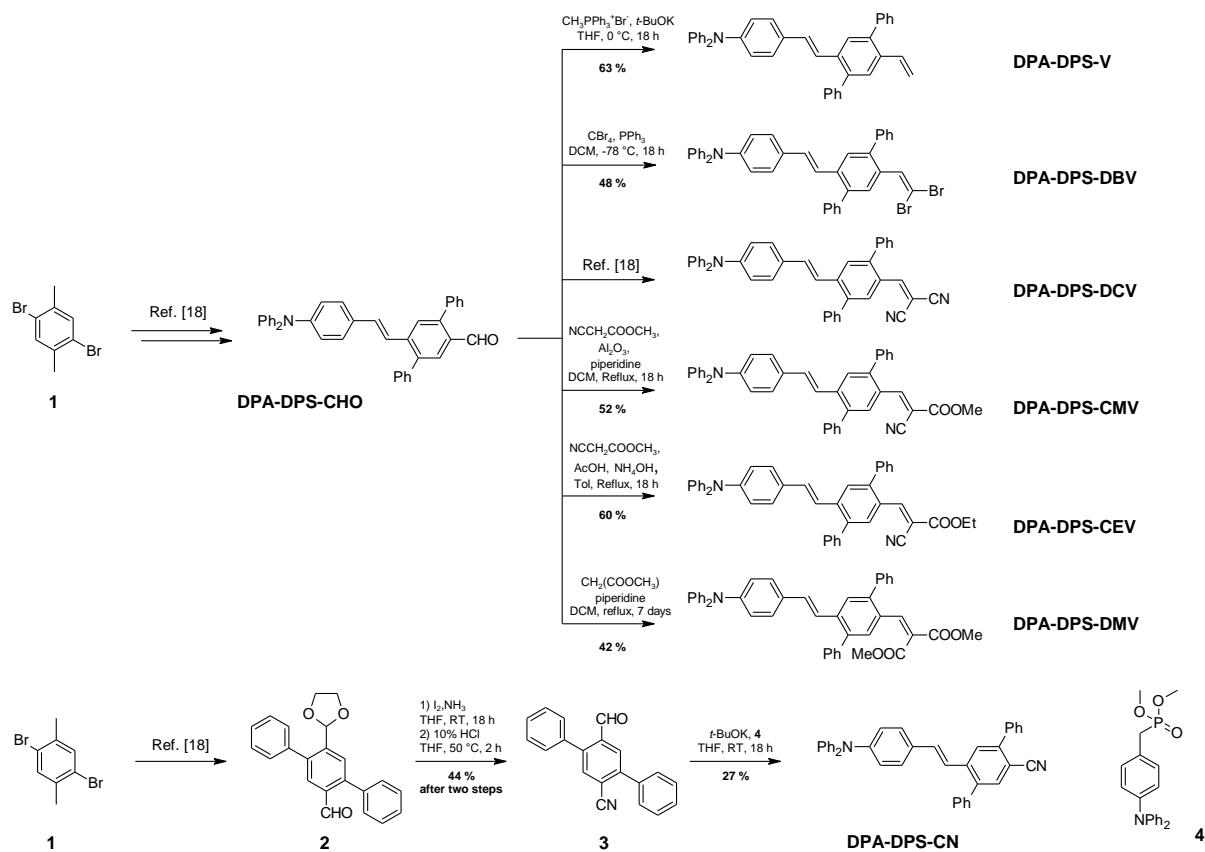

**Scheme S1:** Synthesis of investigated DPA-DPSs and their intermediates.

### 5'-formyl-[1,1':4',1''-terphenyl]-2'-carbonitrile (**3**)

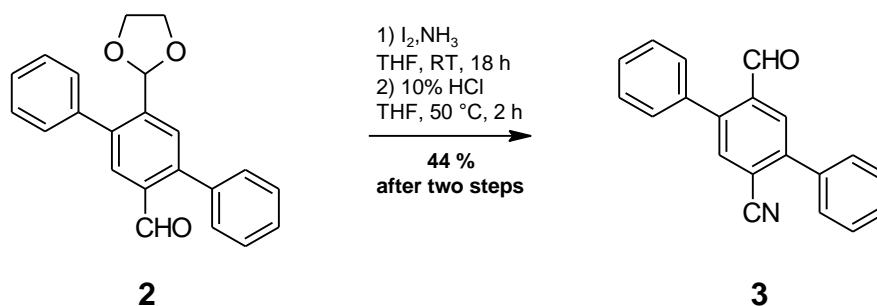

To a 250 mL one-necked flask was charged protected aldehyde **2** (1 g, 3.03 mmol), which was dissolved in THF (30 mL), then iodine (1.5365 g, 6.05 mmol) was added in one portion and cooled to cca 10 ° C. The solution of 28% ammonium hydroxide (40 ml) was slowly added dropwise. The mixture was allowed to stir at RT for 18 h. The reaction was then quenched by the addition of sodium thiosulfate solution (until the mixture was decolorized) and 25 mL of water. The mixture was extracted with EtOAc (3 x 50 mL), the organic phase was dried over Na<sub>2</sub>SO<sub>4</sub>, followed by column chromatography (applied to 5 g of silica gel, *n*-hexane / EtOAc phase = 7/1, v / v). It was obtained protected nitrile as 941 mg (95%) of white crystals. R<sub>f</sub>: 0.38 (*n*-hexane/EtOAc = 3/1, v/v), **m.p.**: 139.5–140.5 °C. **IR (ATR, cm<sup>-1</sup>)**: 2891, 2223, 1479, 1446, 1390, 1177, 1073, 1020, 967, 901, 761, 695, 561, 539, 474. **<sup>1</sup>H NMR** (400 MHz, CD<sub>2</sub>Cl<sub>2</sub>): δ = 7.90 (s, 1H), 7.75 (s, 1H), 7.67-7.65 (m, 2H), 7.59-7.53 (m, 3H), 7.52-7.48 (m, 5H), 5.72 (s, 1H), 4.16 (m, 2H), 3.96 (m, 2H). **<sup>13</sup>C NMR** (400 MHz, CD<sub>2</sub>Cl<sub>2</sub>): δ = 144.3, 141.7, 140.1, 138.2, 137.7, 135.4, 129.7, 129.0, 128.9, 128.8, 128.7, 128.5, 128.3, 118.5, 111.8, 100.4, 65.9. **MALDI-TOF**: Calcd. for C<sub>22</sub>H<sub>17</sub>NO<sub>2</sub> [M+Na]<sup>+</sup> m/z 350.114602; found 350.11572. **Elemental analysis** C<sub>22</sub>H<sub>17</sub>NO<sub>2</sub> calcd.: C, 80.71; H, 5.23; N, 4.28; found: C, 80.94; H, 5.25; N, 4.02.

To a 250 mL three-necked flask equipped with a stirrer, reflux condenser, and thermometer was charged protected nitrile obtained above (0.914 g, 2.79 mmol), which was dissolved in 60 mL of THF and then added dropwise with cooling (10 ° C) 20 mL of 10% HCl. The mixture was allowed to stir at 50 °C. After two hours, the reaction was quenched by TLC by adding 150 mL of saturated NaHCO<sub>3</sub> solution (to neutral pH - indicated by pH paper). The mixture was extracted with EtOAc (3 x 50 mL), the organic phases were combined and washed with saturated NaHCO<sub>3</sub> solution (2 x 70 mL). The organic phases were dried over sodium sulfate, filtered and evaporated. Crude aldehyde was crystallized from EtOAc. It was obtained 785 mg (99%) of white-orange crystals. R<sub>f</sub>: 0.45 (*n*-hexane/EtOAc = 3/1, v/v), **m.p.**: 194.9–195.9 °C. **IR (ATR, cm<sup>-1</sup>)**: 2959, 2925, 2860, 2331, 1729, 1689, 1605, 1473, 1446, 1384, 1263, 1145, 1078, 1017, 924, 808, 762, 698, 573, 480, 455. **<sup>1</sup>H NMR** (500 MHz, CD<sub>2</sub>Cl<sub>2</sub>): δ = 10.04 (s, 1H), 8.13 (s, 1H), 7.92 (s, 1H), 7.67-7.65 (m, 2H), 7.58-7.52 (m, 6H), 7.46-7.45 (m, 2H). **<sup>13</sup>C NMR** (400 MHz, CD<sub>2</sub>Cl<sub>2</sub>): δ = 191.1, 144.5, 137.3, 136.5, 136.4, 135.6, 130.2, 129.4, 129.2, 129.0, 128.9, 117.9, 115.6. **MALDI-TOF**: Calcd. for C<sub>20</sub>H<sub>13</sub>NO [M+Na]<sup>+</sup> m/z 306.08894; found 306.08952. **Elemental analysis** C<sub>20</sub>H<sub>13</sub>NO calcd.: C, 84.78; H, 4.62; N, 4.94; found: C, 85.13 ± 0.12; H, 4.62 ± 0.02; N, 4.65 ± 0.01.

**(E)-5'-(4-(diphenylamino)styryl)-[1,1':4',1''-terphenyl]-2'-carbonitrile (DPA-DPS-CN)**

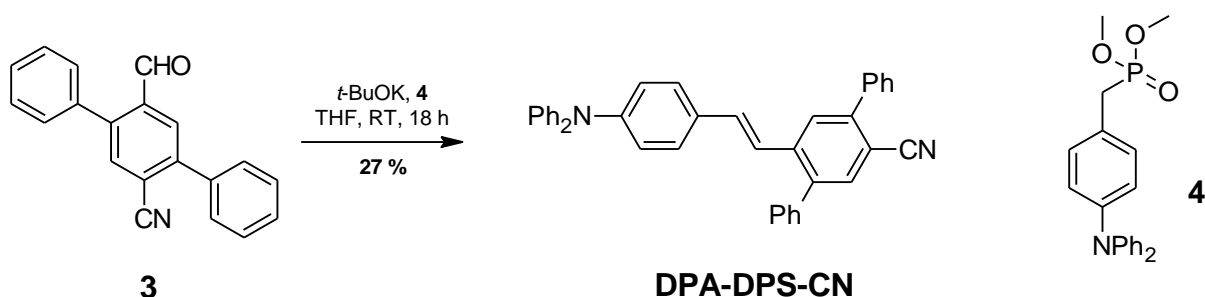

To a 100 mL flame-dried three-necked flask equipped with a stirrer and thermometer was charged phosphonate **4** (1.173 g, 3.19 mmol), which was dissolved in anhydrous THF (35 mL) under nitrogen. The mixture was then cooled to  $-10\text{ }^{\circ}\text{C}$  and solution of *t*-BuOK in THF (1.44 M, 2.77 mL) was added dropwise over 15 minutes. The mixture was allowed to stir for 30 minutes and then aldehyde **3** (0.754 g, 2.66 mmol) dissolved in 10 mL of anhydrous THF was added dropwise at  $-5\text{ }^{\circ}\text{C}$  over 15 minutes. The mixture was stirred for another 30 minutes at  $0\text{ }^{\circ}\text{C}$  and then the mixture was allowed to stir at RT for 18 h. The water (60 ml) was added and the mixture was extracted with ethyl acetate (3 x 50 ml). The organic phases were dried over sodium sulfate, filtered and evaporated. The material was recrystallized twice from EtOAc. It was obtained 384 mg (27%) of yellow crystals. **R<sub>f</sub>**: 0.39 (*n*-hexan/EtOAc = 7/1, v/v), **m.p.**: 125.4–126.9  $^{\circ}\text{C}$ . **IR (ATR,  $\text{cm}^{-1}$ )**: 3029, 2221, 1584, 1489, 1314, 1281, 1268, 1177, 1151, 1074, 1022, 961, 904, 817, 755, 695, 616, 492.  **$^1\text{H NMR}$**  ( $\text{CD}_2\text{Cl}_2$ , 500 MHz):  $\delta$  = 7.92 (s, 1H), 7.75 (s, 1H), 7.72–7.70 (d,  $J=7.65\text{ Hz}$ , 2H), 7.61–7.58 (m, 2H), 7.56–7.52 (m, 3H), 7.49–7.45 (m, 3H), 7.32–7.27 (m, 6H), 7.23–7.20 (m, 1H), 7.12–7.08 (m, 6H), 7.06–7.03 (m, 1H), 7.00–6.99 (m, 2H).  **$^{13}\text{C NMR}$**  ( $\text{CD}_2\text{Cl}_2$ , 100 MHz):  $\delta$  = 148.3, 147.4, 144.1, 140.4, 140.3, 138.8, 138.5, 135.6, 132.5, 130.6, 129.8, 129.5, 128.9, 128.8, 128.7, 128.1, 127.9, 127.1, 125.0, 123.9, 123.6, 122.9, 118.9, 109.3. **MALDI-TOF**:  $[\text{M}]^+$  Calcd. for  $\text{C}_{39}\text{H}_{28}\text{N}_2$  524.2247; found 524.22489. **Elemental analysis**: Calc. for  $\text{C}_{39}\text{H}_{28}\text{N}_2$ : C, 89.28; H, 5.38; N, 5.34; found: C,  $88.70 \pm 0.31$ ; H,  $5.36 \pm 0.06$ ; N,  $5.08 \pm 0.02$ .

**(E)-N,N-diphenyl-4-(2-(5'-vinyl-[1,1':4',1''-terphenyl]-2'-yl)vinyl)aniline (DPA-DPS-V)**

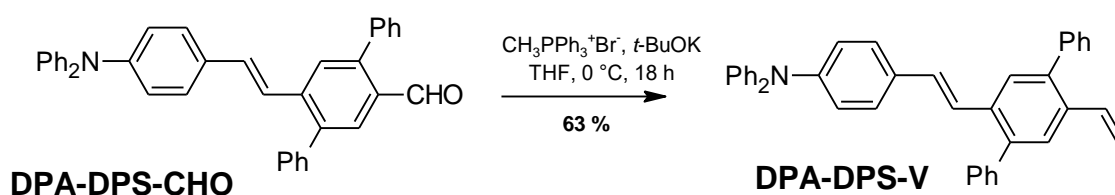

A 3-necked 250 mL round bottom flask equipped with a stirrer and thermometer was charged with  $\text{CH}_3\text{PPh}_3^+\text{Br}^-$  (2.25 g, 6.28 mmol), which was then dissolved in anhydrous THF (130 mL). The mixture was cooled to  $0\text{ }^{\circ}\text{C}$  and solution of *t*-BuOK in THF (1.47 M, 3.83 mL, 5.63 mmol) was added dropwise via syringe pump over 15 minutes, the mixture was stirred for another 30 minutes at the same temperature. Subsequently, aldehyde (2.71 g, 5.13 mmol) dissolved in 30 mL of anhydrous THF was added dropwise via syringe pump over 15 minutes, and the mixture was stirred at  $0\text{ }^{\circ}\text{C}$  for another 10 minutes and then allowed to stir at RT for 18 hours. The reaction was quenched by the addition of saturated  $\text{NH}_4\text{Cl}$  solution (100 mL) and the mixture was extracted with EtOAc (3 x 75 mL). The organic phases were dried over sodium sulphate, evaporated, followed by column chromatography (*n*-hexane/EtOAc phase = 100/1, v/v, applied to 12 g of silica gel). Chromatography gave 2.3 g of the product, followed the crystallization from EtOAc to give 1.7 g (63%) of slightly greenish crystals. **R<sub>f</sub>**: 0.7

(*n*-hexan/EtOAc = 7/1, v/v), **m.p.**: 163.1–163.7 °C. **IR (ATR, cm<sup>-1</sup>)**: 3020, 1584, 1486, 1326, 1274, 1174, 1075, 1016, 993, 960, 891, 821, 748, 694, 621, 535, 497. **<sup>1</sup>H NMR** (CD<sub>2</sub>Cl<sub>2</sub>, 500 MHz): 7.72-7.66 (d, 2H), 7.52-7.42 (m, 10H), 7.31-7.25 (m, 7H), 7.10-7.04 (m, 7H), 6.99-6.98 (m, 2H), 6.81-6.75 (dd, 1H), 5.80-5.76 (d, *J*=17.5 Hz, 1H), 5.24-5.22 (d, *J*=11.1 Hz, 1H). **<sup>13</sup>C NMR** (CD<sub>2</sub>Cl<sub>2</sub>, 125 MHz): 147.6, 147.5, 147.4, 147.3, 146.9, 141.0, 140.8, 140.6, 140.5, 140.4, 140.2, 139.4, 137.4, 135.2, 134.9, 134.5, 131.6, 129.8, 129.7, 129.3, 129.0, 128.2, 128.1, 127.4, 127.3, 127.2, 127.2, 127.1, 127.0, 126.5, 125.1, 124.5, 124.3, 123.3, 123.1, 114.5. **MALDI-TOF**: [M]<sup>+</sup> Calcd. for C<sub>40</sub>H<sub>31</sub>N 525.2451; found 525.24604. **Elemental analysis**: Calc. for C<sub>40</sub>H<sub>31</sub>N: C, 91.39; H, 5.94; N, 2.66; found: C, 91.75 ± 0.37; H, 5.98 ± 0.01; N, 2.52 ± 0.01.

**Ethyl (*E*)-2-cyano-3-(5'-((*E*)-4-(diphenylamino)styryl)-[1,1':4',1''-terphenyl]-2'-yl)acrylate (DPA-DPS-CEV)**

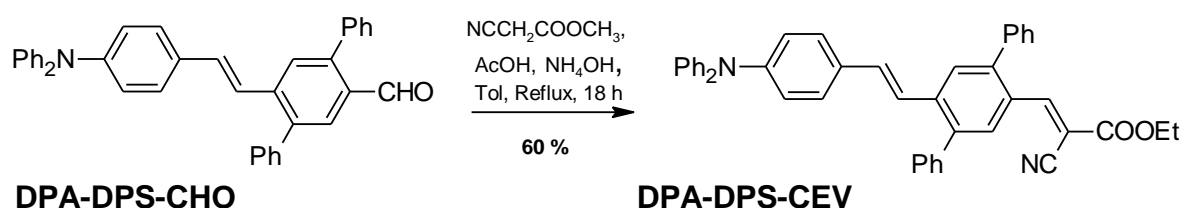

To a 100 mL three-necked flask equipped with a stirrer and thermometer was charged 0.5 g of aldehyde (9.48 mmol), which was dissolved in 40 mL of toluene. Then 0.3 mL of ethyl cyanoacetate (2.84 mmol), 0.44 mL of 25% NH<sub>4</sub>OH (2.84 mmol) and 4.6 mL of acetic acid were added. The mixture was brought to reflux for 18 hours. After that time, the reaction was quenched and extracted with DCM (3 x 50 mL), the organic phases were combined, washed with water (3 x 50 mL) and dried over sodium sulphate. After filtration and evaporation, 731 mg of a crude mixture was crystallized from a mixture of EtOAc/MeOH/*n*-hexane/DCM to give red crystals (354 mg, 60%). **R<sub>f</sub>**: 0.26 (*n*-hexan/EtOAc = 7/1, v/v). **m.p.**: 218.5–219.5 °C. **IR (ATR, cm<sup>-1</sup>)**: 3032, 2220, 1720, 1580, 1487, 1323, 1244, 1162, 1090, 1019, 967, 899, 820, 753, 696, 619, 566, 500. **<sup>1</sup>H NMR** (CD<sub>2</sub>Cl<sub>2</sub>, 500 MHz): 8.31 (s, 1H), 8.26 (s, 1H), 7.92 (s, 1H), 7.57-7.53 (m, 7H), 7.49-7.44 (m, 3H), 7.31-7.23 (m, 7H), 7.13-7.07 (m, 7H), 7.00-6.98 (d, 2H), 4.35-4.31 (q, 2H), 1.37-1.34 (t, 3H). **<sup>13</sup>C NMR** (CD<sub>2</sub>Cl<sub>2</sub>, 125 MHz): 162.4, 154.0, 148.0, 147.3, 143.9, 140.2, 139.8, 139.4, 139.0, 131.7, 130.7, 130.6, 130.0, 129.8, 129.3, 128.5, 128.4, 128.3, 127.7, 127.3, 124.8, 124.5, 124.2, 123.4, 122.8, 115.8, 103.4, 62.5, 13.9. **MALDI-TOF**: [M]<sup>+</sup> Calcd. for C<sub>44</sub>H<sub>34</sub>N<sub>2</sub>O<sub>2</sub> 622.26148; found 622.26173.

**Methyl (*E*)-2-cyano-3-(5'-((*E*)-4-(diphenylamino)styryl)-[1,1':4',1''-terphenyl]-2'-yl)acrylate (DPA-DPS-CMV)**

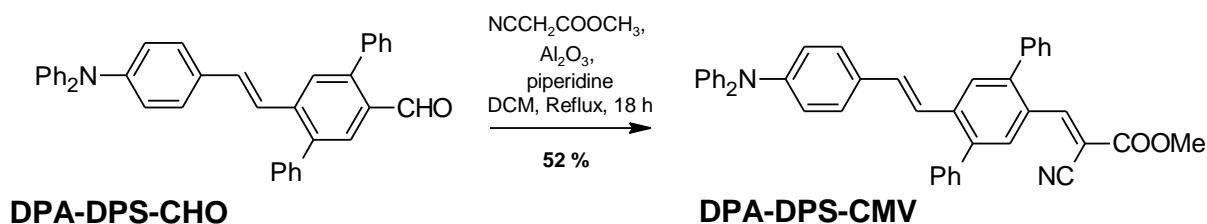

To a 50 mL flask equipped with a stirrer and thermometer was charged 0.5 g of aldehyde (9.48 mmol), which was dissolved in 12 mL of DCM. Then half a teaspoon of basic alumina and 0.25 mL of methyl

cianoacetate (2.84 mmol) were added. The mixture was allowed to stir at RT for 2 hours after refluxed for 18 hours. After 18 hours, the mixture was filtered, evaporated. It was obtained 750 mg of crude mixture, which was crystallized, from DCM. After crystallization was obtained 303 mg (52%) of a red powder. (*R*<sub>f</sub>: 0.18 (*n*-hexan/EtOAc = 7/1, v/v). **m.p.**: 233.3–234.5 °C. **IR (ATR, cm<sup>-1</sup>)**: 3037, 2223, 1729, 1569, 1485, 1432, 1334, 1252, 1166, 1089, 1024, 965, 943, 906, 819, 758, 698, 621, 562, 520, 498. **<sup>1</sup>H NMR** (CD<sub>2</sub>Cl<sub>2</sub>, 500 MHz): 8.31 (s, 1H), 8.27 (s, 1H), 7.92 (s, 1H), 7.56-7.53 (m, 7H), 7.45-4.44 (m, 3H), 7.31-7.23 (m, 7H), 7.13-7.07 (m, 7H), 7.00-6.98 (d, 2H), 3.88 (s, 3H). **<sup>13</sup>C NMR** (CD<sub>2</sub>Cl<sub>2</sub>, 125 MHz): 162.9, 154.3, 148.1, 147.3, 143.9, 140.2, 139.9, 139.4, 138.9, 131.8, 130.7, 130.6, 130.0, 129.8, 129.3, 129.1, 128.5, 128.4, 128.3, 128.2, 127.8, 127.4, 124.9, 124.8, 124.5, 124.2, 123.4, 122.7, 115.8, 102.9, 53.2. **MALDI-TOF**: [M]<sup>+</sup> Calcd. For C<sub>43</sub>H<sub>32</sub>N<sub>2</sub>O<sub>2</sub> 608.24583; found 608.24819.

**Dimethyl (*E*)-2-((5'-(4-(diphenylamino)styryl)-[1,1':4',1''-terphenyl]-2'-yl)methylene)malonate (DPA-DPS-DMV)**

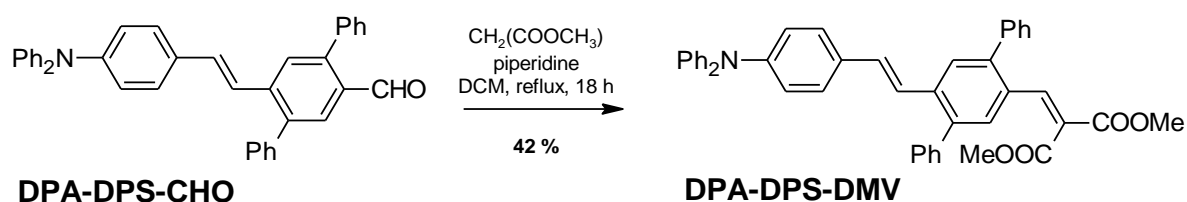

To a 100 mL round bottom flask was charged 0.5 g of aldehyde (9.48 mmol), which was dissolved in 12 mL of DCM, then 0.32 mL of dimethyl malonate was added, and few drops of piperidine were added dropwise. The mixture was allowed to stir at reflux for 18 h, then water was added. The mixture was extracted with DCM (3 x 50 mL), the organics were combined, dried over sodium sulphate and evaporated. The material was crystallized from a mixture of DCM/*n*-hexane/EtOAc/MeOH to give 270 mg (45%) as fine red crystals. **R**<sub>f</sub>: 0.16 (*n*-hexan/EtOAc = 7/1, v/v). **m.p.**: 211.0–211.6 °C. **IR (ATR, cm<sup>-1</sup>)**: 3032, 2946, 1723, 1625, 1583, 1488, 1439, 1378, 1332, 1273, 1240, 1220, 1159, 1067, 1022, 989, 967, 905, 818, 751, 696, 620, 535, 499, 445. **<sup>1</sup>H NMR** (CD<sub>2</sub>Cl<sub>2</sub>, 500 MHz): 7.85 (s, 1H), 7.71 (s, 1H), 7.54-7.49 (m, 7H), 7.46-7.42 (m, 4H), 7.31-7.27 (m, 6H), 7.19-7.16 (d, 1H), 7.11-7.03 (m, 7H), 6.99-6.98 (d, 2H), 3.79 (s, 3H), 3.78 (s, 3H). **<sup>13</sup>C NMR** (CD<sub>2</sub>Cl<sub>2</sub>, 125 MHz): 169.9, 164.3, 147.7, 147.4, 142.8, 142.0, 140.1, 139.9, 139.5, 137.6, 131.0, 130.6, 130.3, 130.2, 129.8, 129.6, 129.3, 128.4, 128.3, 127.9, 127.6, 127.5, 127.1, 126.2, 124.6, 124.5, 123.3, 122.9, 52.5. **MALDI-TOF**: [M]<sup>+</sup> Calcd. For C<sub>44</sub>H<sub>35</sub>NO<sub>4</sub>: 641.25606; found 641.25797. **Elemental analysis**: Calc. for C<sub>44</sub>H<sub>35</sub>NO<sub>4</sub>: C, 82.35; H, 5.50; N, 2.18; found: C, 82.16 ± 0.28; H, 5.62 ± 0.02; N, 2.09 ± 0.03.

**(*E*)-4-(2-(5'-(2,2-dibromovinyl)-[1,1':4',1''-terphenyl]-2'-yl)vinyl)-*N,N*-diphenylaniline (DPA-DPS-DBV)**

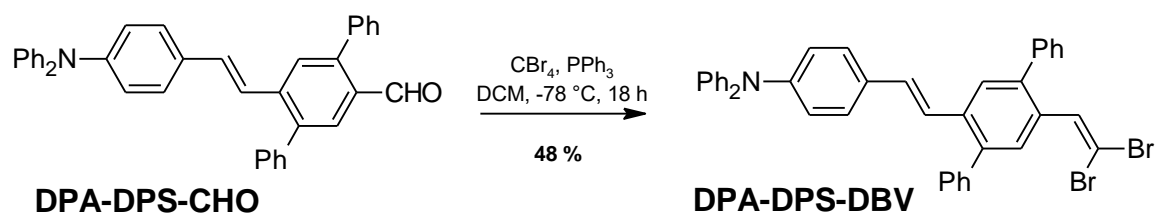

To the 100 ml flame-dried three-necked flask equipped with a stirrer and a thermometer was added CBr<sub>4</sub> (0.556 g, 1.7 mmol), which was dissolved in 40 ml of anhydrous DCM. The solution was cooled to



-5 °C and a solution of PPh<sub>3</sub> (0.895 g, 3.4 mmol) in 5 mL of anhydrous DCM was added dropwise. The mixture was cooled to -78 °C and a solution of aldehyde (0.5 g, 9.48 mmol) in 5 mL of dry DCM was added dropwise. The mixture was allowed to stir for 2 hours at -78 °C and then for 18 hours at RT. Then, the reaction was quenched by the addition of 50 mL of saturated NH<sub>4</sub>Cl solution, followed by extraction with DCM (3 x 50 mL) and drying over sodium sulphate. For purification, column chromatography was performed (n-hexane/EtOAc phase = 39/1, v / v, substance applied to 6 g of silica gel). 441 mg of product was isolated and crystallized from EtOAc to give 310 mg (48%) of yellow crystals. **R<sub>f</sub>**: 0.45 (n-hexan/EtOAc = 19/1, v/v). **m.p.**: 198–199 °C. **IR (ATR, cm<sup>-1</sup>)**: 3029, 1587, 1491, 1314, 1282, 1175, 1155, 1072, 1023, 958, 904, 858, 819, 797, 749, 692, 622, 521, 499. **<sup>1</sup>H NMR** (CDCl<sub>3</sub>, 500 MHz): δ = 7.75-7.74 (m, 2H), 7.53-7.41 (m, 11H), 7.28 (m, 3H), 7.25-7.24 (m, 2H), 7.11-7.10 (m, 4H), 7.07-6.99 (m, 6H). **<sup>13</sup>C NMR** (CDCl<sub>3</sub>, 100 MHz): δ= 147.7, 147.6, 140.5, 140.3, 140.1, 139.9, 137.1, 136.0, 132.7, 131.6, 131.2, 130.1, 130.0, 129.7, 129.5, 128.6, 128.5, 127.9, 127.7, 127.6, 127.2, 125.3, 124.8, 123.5, 123.3, 90.9. **MALDI-TOF**: [M]<sup>+</sup> Calcd. For C<sub>40</sub>H<sub>29</sub>Br<sub>2</sub>N<sub>2</sub>: 695.0692; found 681.06693. **Elemental analysis**: Calc. for C<sub>40</sub>H<sub>29</sub>Br<sub>2</sub>N<sub>2</sub>: C, 70.29; H, 4.28; N, 2.05; found: C, 70.51 ± 0.02; H, 4.58 ± 0.04; N, 1.88 ± 0.02.

<sup>1</sup>H NMR spectrum of 5'-(1,3-dioxolan-2-yl)-[1,1':4',1''-terphenyl]-2'-carbonitrile

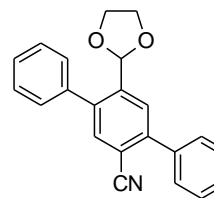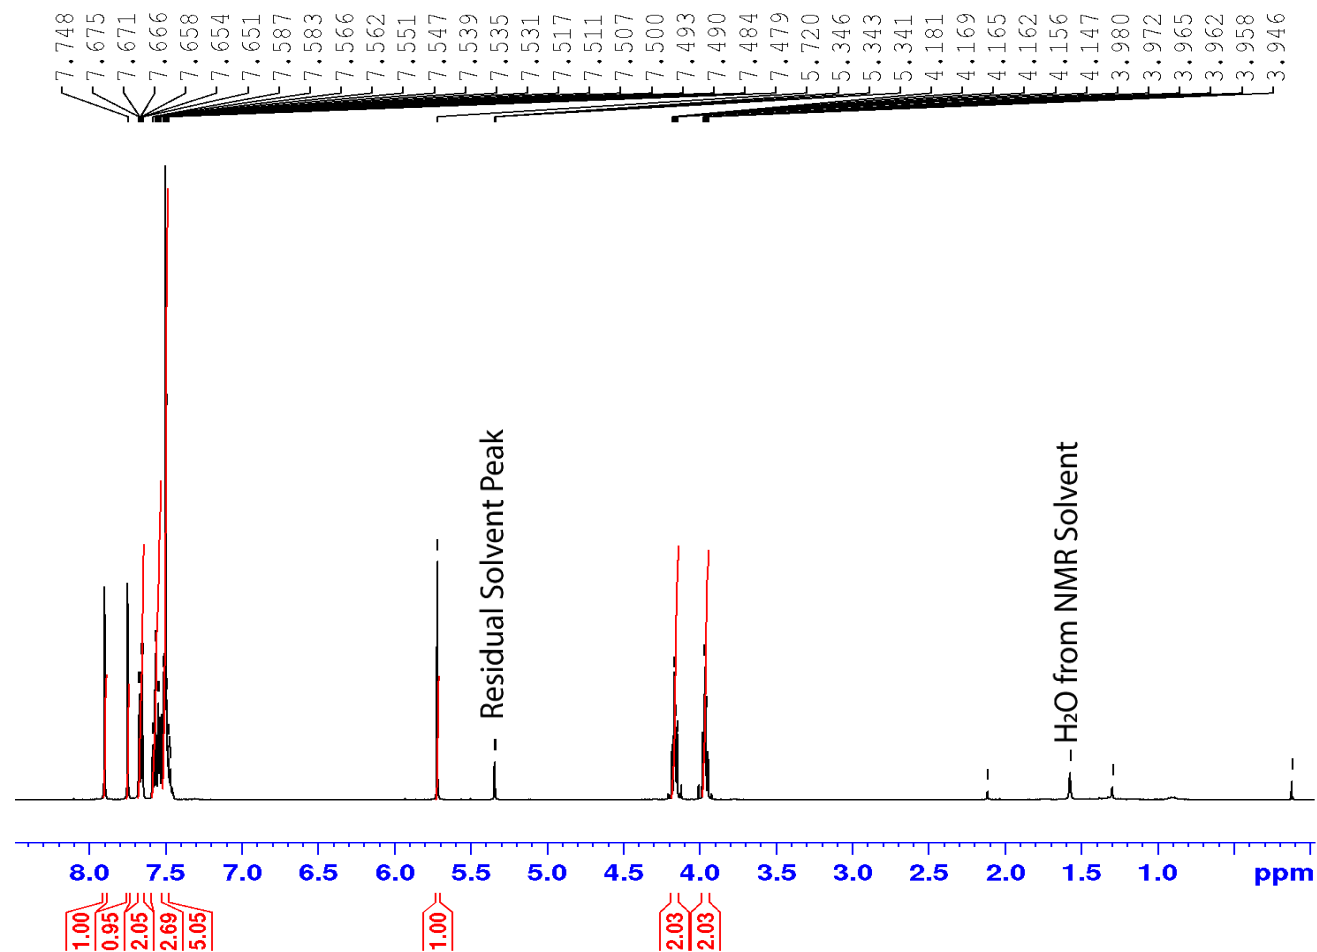

Current Data Parameters  
 NAME DPP  
 EXPNO 291  
 PROCNO 1

F2 - Acquisition Parameters  
 Date\_ 20200310  
 Time 16.11  
 INSTRUM spect  
 PROBHD 5 mm PABBO BB-  
 PULPROG zg30  
 TD 65536  
 SOLVENT CD2Cl2  
 NS 8  
 DS 2  
 SWH 8223.685 Hz  
 FIDRES 0.125483 Hz  
 AQ 3.9845889 sec  
 RG 144  
 DW 60.800 usec  
 DE 6.50 usec  
 TE 295.0 K  
 D1 1.00000000 sec  
 TD0 1

----- CHANNEL f1 -----  
 SFO1 400.1324710 MHz  
 NUC1 1H  
 P1 10.00 usec  
 PLW1 26.98999977 W

F2 - Processing parameters  
 SI 32768  
 SF 400.1300065 MHz  
 WDW EM  
 SSB 0  
 LB 0.30 Hz  
 GB 0  
 PC 1.00

<sup>13</sup>C NMR spectrum of 5'-(1,3-dioxolan-2-yl)-[1,1':4',1''-terphenyl]-2'-carbonitrile

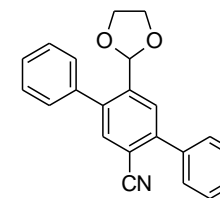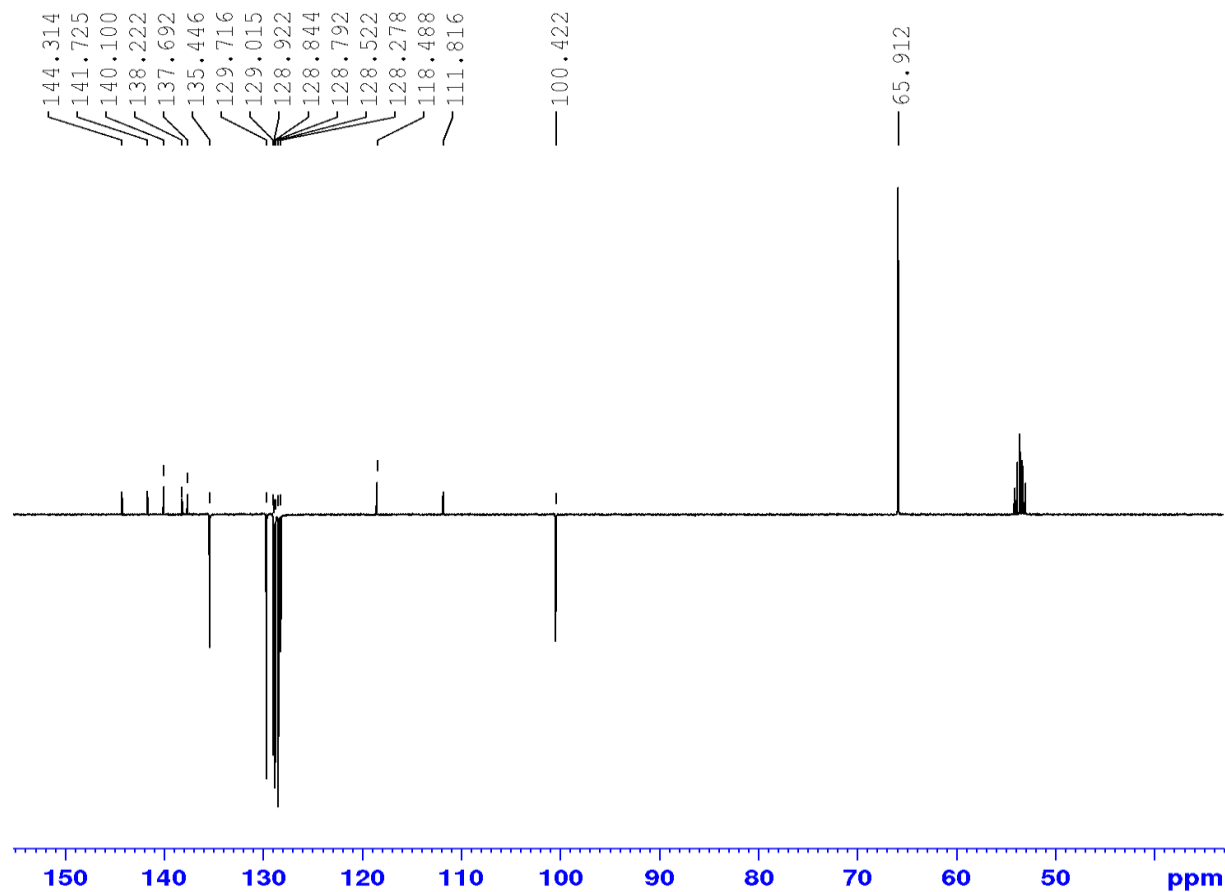

```

Current Data Parameters
NAME           DPP
EXPNO          292
PROCNO         1

F2 - Acquisition Parameters
Date_          20200310
Time           16.15
INSTRUM        spect
PROBHD         5 mm PABBO BB-
PULPROG        jmod
TD             65536
SOLVENT        CD2C12
NS             11264
DS             4
SWH            24038.461 Hz
FIDRES         0.366798 Hz
AQ             1.3631488 sec
RG             2050
DW             20.800 usec
DE             6.50 usec
TE             295.6 K
CNST2          145.0000000
CNST11         1.0000000
D1             2.00000000 sec
D20            0.00689655 sec
TD0            1

===== CHANNEL f1 =====
SFO1           100.6228298 MHz
NUC1           13C
P1             10.00 usec
P2             20.00 usec
PLW1           50.27999878 W

===== CHANNEL f2 =====
SFO2           400.1316005 MHz
NUC2           1H
CPDPRG[2]     waltz16
PCPD2         90.00 usec
PLW2           26.98999977 W
PLW12         0.33320999 W

F2 - Processing parameters
SI             32768
SF             100.6127507 MHz
WDW            EM
SSB            0
LB             1.00 Hz
GB             0
PC             1.40
    
```

<sup>1</sup>H NMR spectrum of 5'-formyl-[1,1':4',1''-terphenyl]-2'-carbonitrile (3)

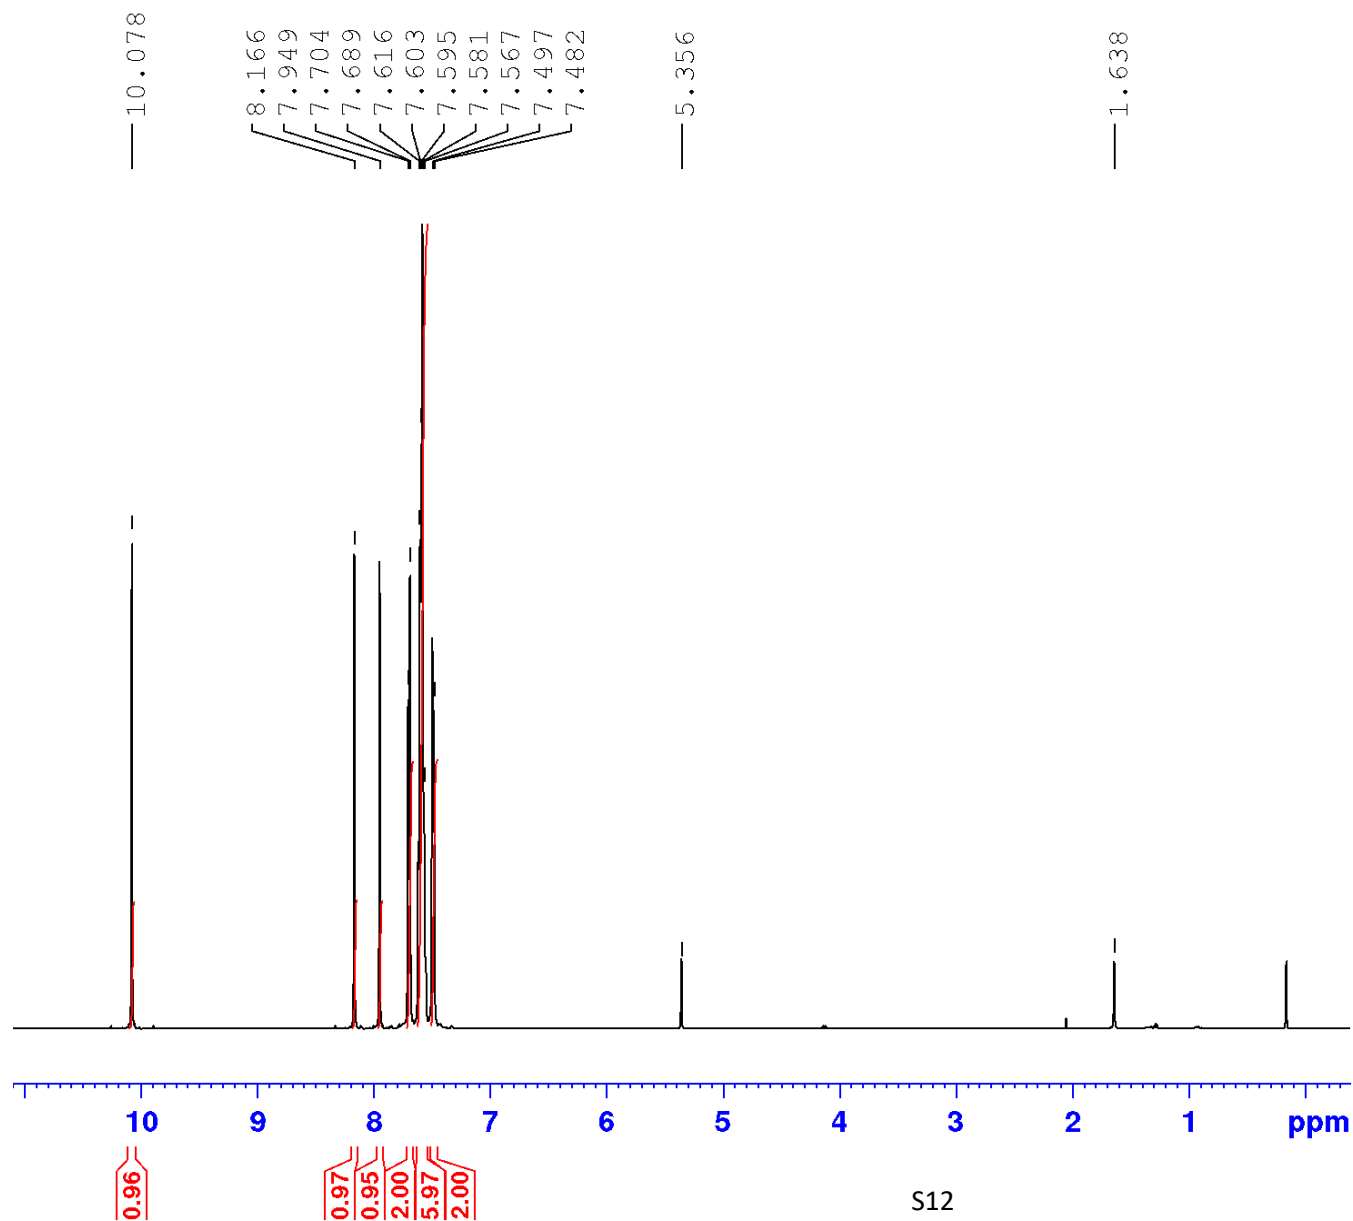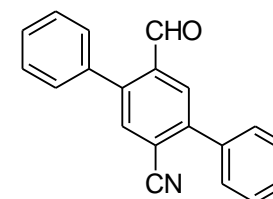

Current Data Parameters  
 NAME DPP  
 EXPNO 118  
 PROCNO 4

F2 - Acquisition Parameters  
 Date\_ 20200707  
 Time 6.16  
 INSTRUM spect  
 PROBHD 5 mm PATBI 1H/  
 PULPROG zg30  
 TD 65536  
 SOLVENT CD2Cl2  
 NS 8  
 DS 2  
 SWH 10000.000 Hz  
 FIDRES 0.152588 Hz  
 AQ 3.2767999 sec  
 RG 98.58  
 DW 50.000 usec  
 DE 6.50 usec  
 TE 0 K  
 D1 1.00000000 sec  
 TD0 1

===== CHANNEL f1 =====  
 SFO1 500.2030889 MHz  
 NUC1 1H  
 P1 10.00 usec  
 PLW1 8.00000000 W

F2 - Processing parameters  
 SI 65536  
 SF 500.2000000 MHz  
 WDW EM  
 SSB 0  
 LB 0.30 Hz  
 GB 0  
 PC 1.00

<sup>13</sup>C NMR spectrum of 5'-formyl-[1,1':4',1''-terphenyl]-2'-carbonitrile (3)

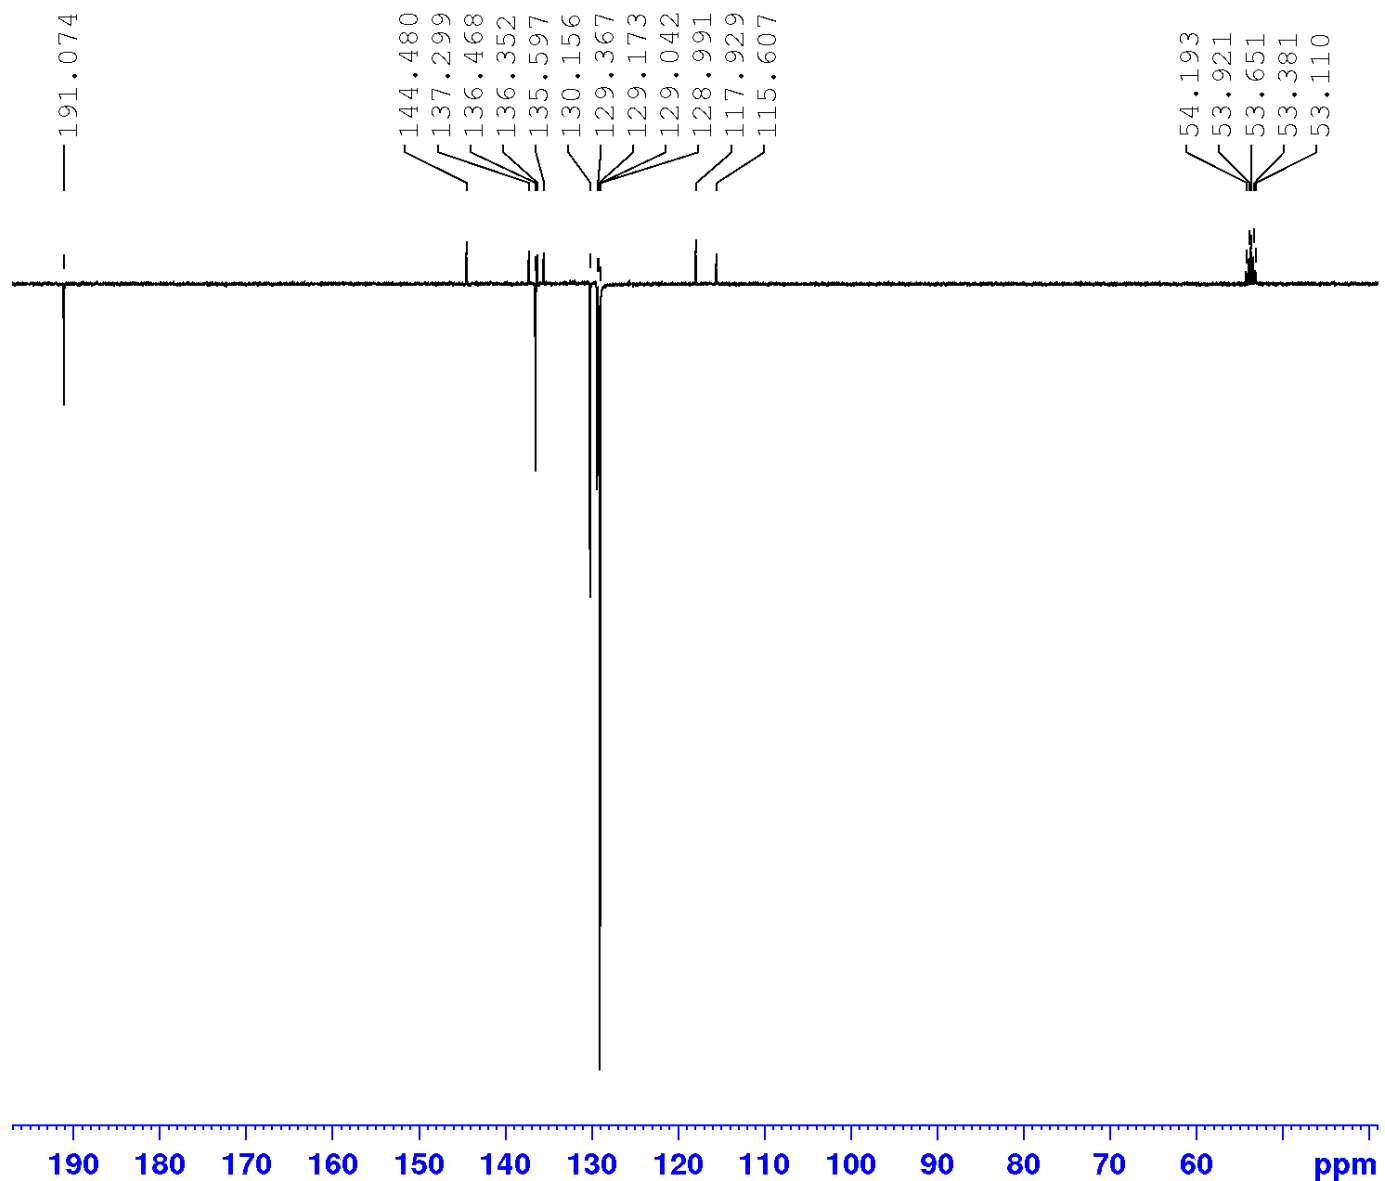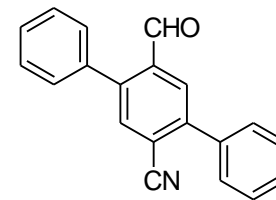

Current Data Parameters  
 NAME DPP  
 EXPNO 310  
 PROCNO 1

F2 - Acquisition Parameters  
 Date\_ 20200708  
 Time 6.35  
 INSTRUM spect  
 PROBHD 5 mm PABBO BB-  
 PULPROG jmod  
 TD 65536  
 SOLVENT CD2Cl2  
 NS 1033  
 DS 4  
 SWH 24038.461 Hz  
 FIDRES 0.366798 Hz  
 AQ 1.3631488 sec  
 RG 2050  
 DW 20.800 usec  
 DE 6.50 usec  
 TE 296.0 K  
 CNST2 145.0000000  
 CNST11 1.0000000  
 D1 2.00000000 sec  
 D20 0.00689655 sec  
 TD0 1

==== CHANNEL f1 =====  
 SFO1 100.6228298 MHz  
 NUC1 13C  
 P1 10.00 usec  
 P2 20.00 usec  
 PLW1 50.27999878 W

==== CHANNEL f2 =====  
 SFO2 400.1316005 MHz  
 NUC2 1H  
 CPDPRG[2] waltz16  
 PCPD2 90.00 usec  
 PLW2 26.98999977 W  
 PLW12 0.33320999 W

F2 - Processing parameters  
 SI 32768  
 SF 100.6127507 MHz  
 WDW EM  
 SSB 0  
 LB 1.00 Hz  
 GB 0  
 PC 1.40

<sup>1</sup>H NMR spectrum of (E)-5'-(4-(diphenylamino)styryl)-[1,1':4',1''-terphenyl]-2'-carbonitrile (DPA-DPS-CN)

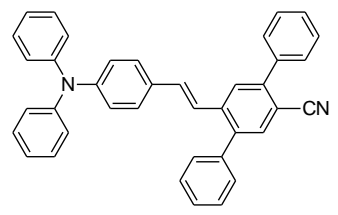

Current Data Parameters  
 NAME DPP  
 EXPNO 107  
 PROCNO 4

F2 - Acquisition Parameters  
 Date\_ 20200610  
 Time 7.24  
 INSTRUM spect  
 PROBHD 5 mm PATBI 1H/  
 PULPROG zg30  
 TD 65536  
 SOLVENT CD2C12  
 NS 8  
 DS 2  
 SWH 10000.000 Hz  
 FIDRES 0.152588 Hz  
 AQ 3.2767999 sec  
 RG 103.54  
 DW 50.000 usec  
 DE 6.50 usec  
 TE 0 K  
 D1 1.00000000 sec  
 TD0 1

===== CHANNEL f1 =====  
 SFO1 500.2030889 MHz  
 NUC1 1H  
 P1 10.00 usec  
 PLW1 8.00000000 W

F2 - Processing parameters  
 SI 65536  
 SF 500.2000000 MHz  
 WDW EM  
 SSB 0  
 LB 0.30 Hz  
 GB 0  
 PC 1.00

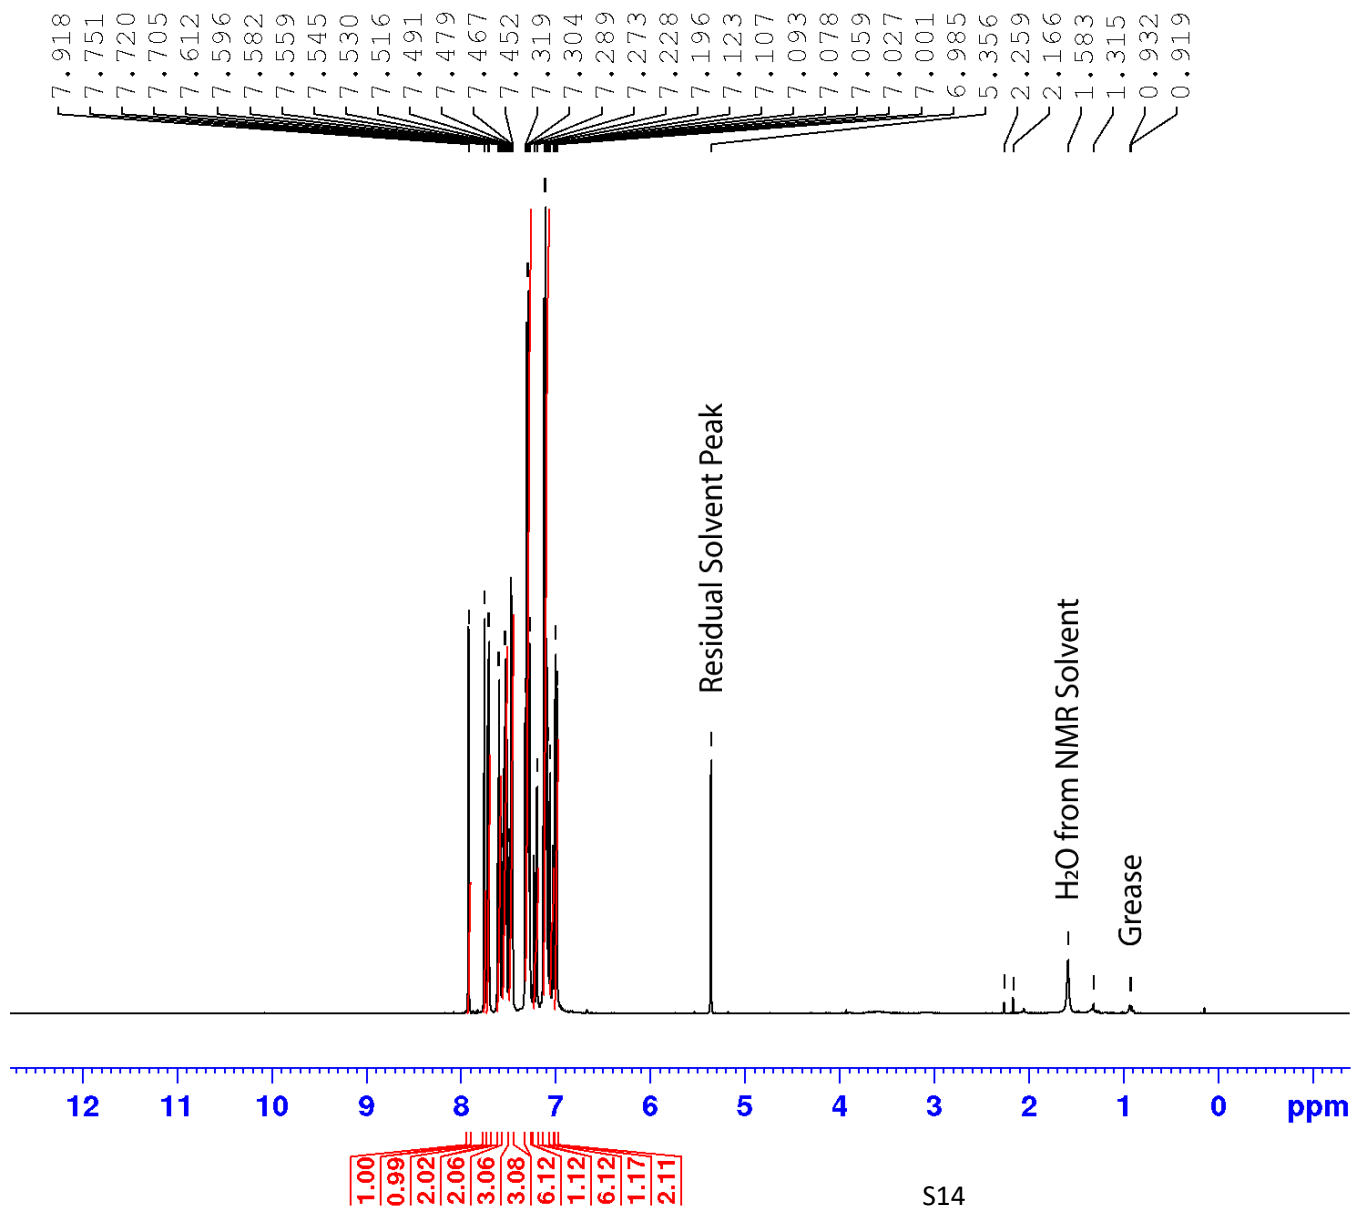

<sup>1</sup>H NMR spectrum of aromatic part of (E)-5'-(4-(diphenylamino)styryl)-[1,1':4',1''-terphenyl]-2'-carbonitrile (DPA-DPS-CN)

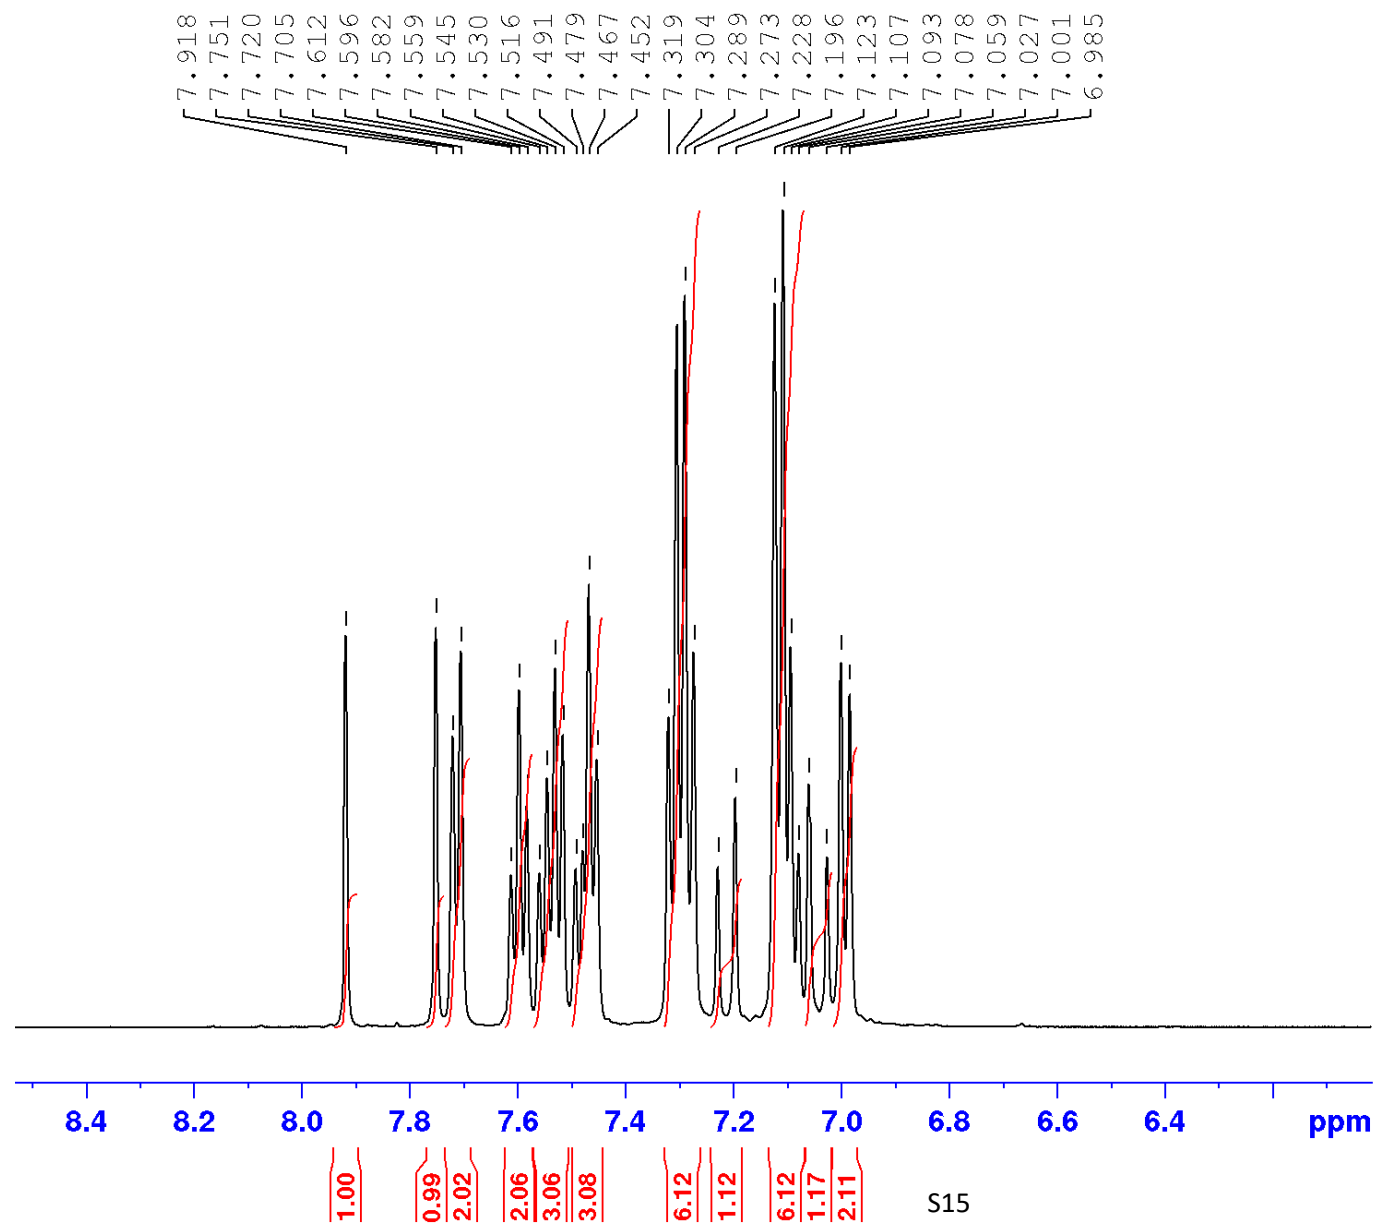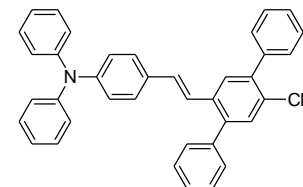

Current Data Parameters  
 NAME DPP  
 EXPNO 107  
 PROCNO 4

F2 - Acquisition Parameters  
 Date\_ 20200610  
 Time 7.24  
 INSTRUM spect  
 PROBHD 5 mm PATBI 1H/  
 PULPROG zg30  
 TD 65536  
 SOLVENT CD2Cl2  
 NS 8  
 DS 2  
 SWH 10000.000 Hz  
 FIDRES 0.152588 Hz  
 AQ 3.2767999 sec  
 RG 103.54  
 DW 50.000 usec  
 DE 6.50 usec  
 TE 0 K  
 D1 1.00000000 sec  
 TD0 1

===== CHANNEL f1 =====  
 SFO1 500.2030889 MHz  
 NUC1 1H  
 P1 10.00 usec  
 PLW1 8.00000000 W

F2 - Processing parameters  
 SI 65536  
 SF 500.2000000 MHz  
 WDW EM  
 SSB 0  
 LB 0.30 Hz  
 GB 0  
 PC 1.00

<sup>13</sup>C NMR spectrum of (E)-5'-(4-(diphenylamino)styryl)-[1,1':4',1''-terphenyl]-2'-carbonitrile (DPA-DPS-CN)

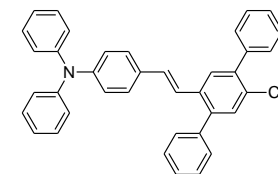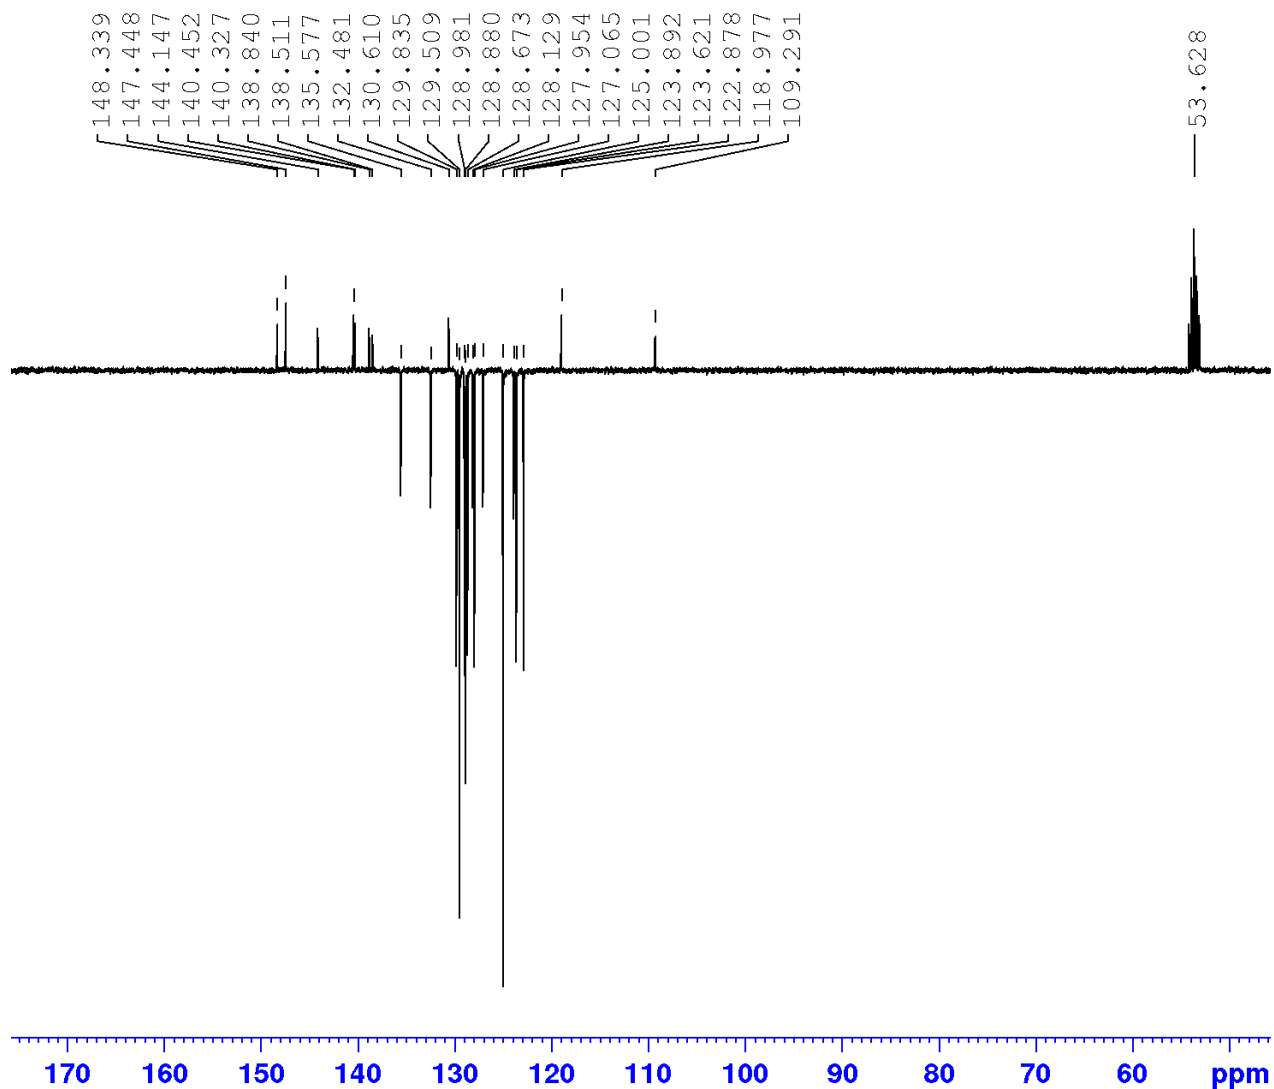

Current Data Parameters  
NAME DPP  
EXPNO 306  
PROCNO 1

F2 - Acquisition Parameters  
Date\_ 20200610  
Time 6.19  
INSTRUM spect  
PROBHD 5 mm PABBO BB-  
PULPROG jmod  
TD 65536  
SOLVENT CD2C12  
NS 1026  
DS 4  
SWH 24038.461 Hz  
FIDRES 0.366798 Hz  
AQ 1.3631488 sec  
RG 2050  
DW 20.800 usec  
DE 6.50 usec  
TE 294.4 K  
CNST2 145.0000000  
CNST11 1.0000000  
D1 2.00000000 sec  
D20 0.00689655 sec  
TD0 1

===== CHANNEL f1 =====  
SFO1 100.6228298 MHz  
NUC1 13C  
P1 10.00 usec  
P2 20.00 usec  
PLW1 50.27999878 W

===== CHANNEL f2 =====  
SFO2 400.1316005 MHz  
NUC2 1H  
CPDPRG[2] waltz16  
PCPD2 90.00 usec  
PLW2 26.98999977 W  
PLW12 0.33320999 W

F2 - Processing parameters  
SI 32768  
SF 100.6127507 MHz  
WDW EM  
SSB 0  
LB 1.00 Hz  
GB 0  
PC 1.40



<sup>13</sup>C NMR spectrum of aromatic part of (E)-5'-(4-(diphenylamino)styryl)-[1,1':4',1''-terphenyl]-2'-carbonitrile (DPA-DPS-CN)

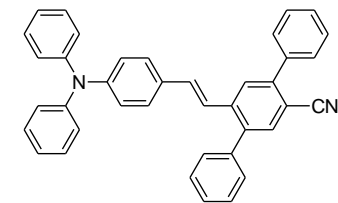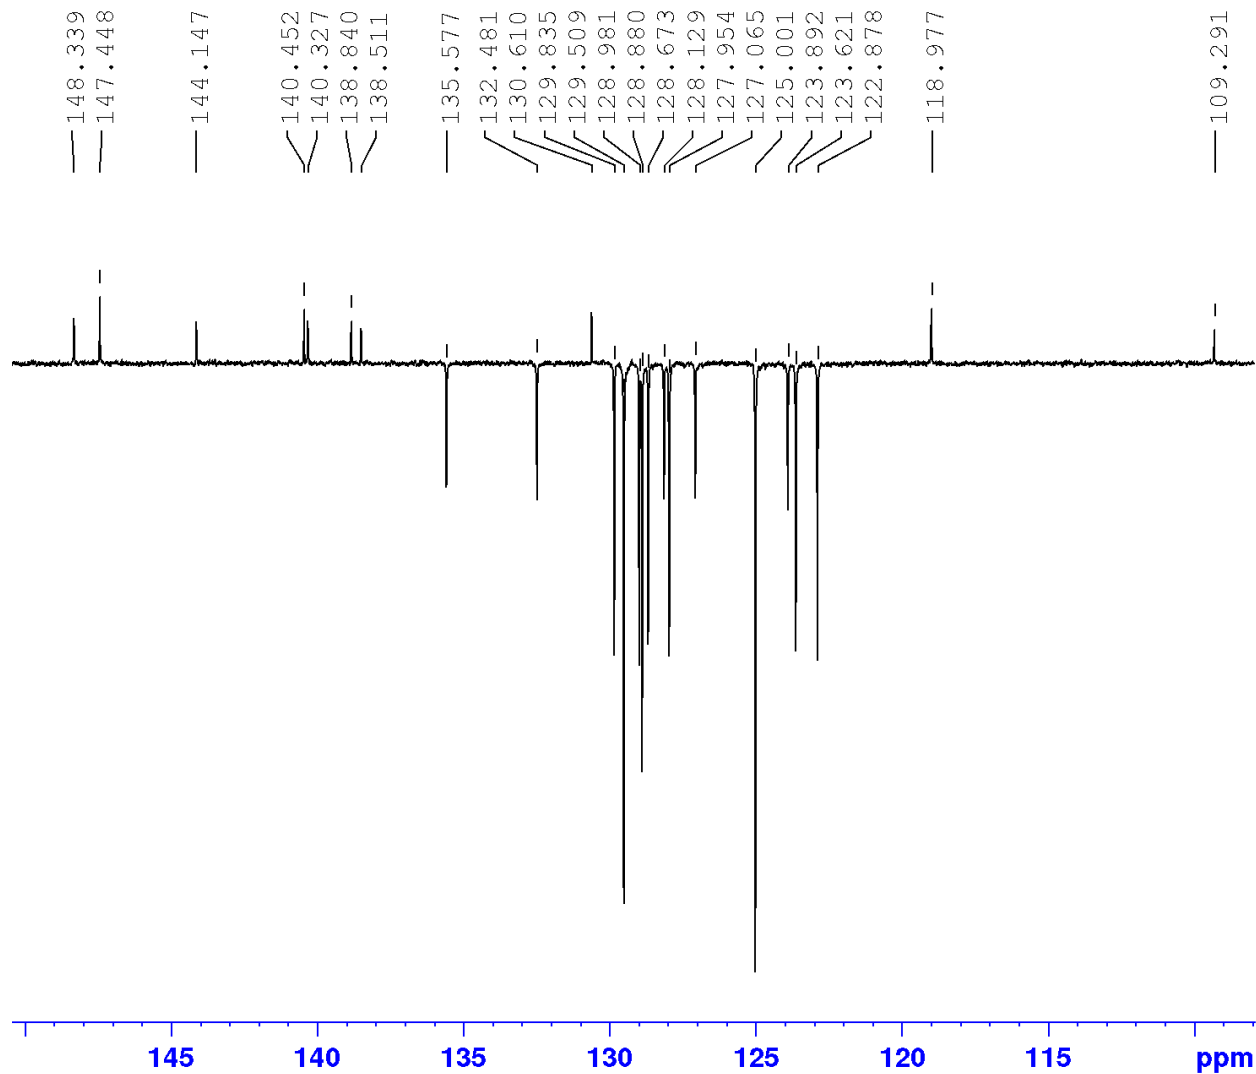

Current Data Parameters  
 NAME DPP  
 EXPNO 306  
 PROCNO 1

F2 - Acquisition Parameters  
 Date\_ 20200610  
 Time 6.19  
 INSTRUM spect  
 PROBHD 5 mm PABBO BB-  
 PULPROG jmod  
 TD 65536  
 SOLVENT CD2Cl2  
 NS 1026  
 DS 4  
 SWH 24038.461 Hz  
 FIDRES 0.366798 Hz  
 AQ 1.3631488 sec  
 RG 2050  
 DW 20.800 usec  
 DE 6.50 usec  
 TE 294.4 K  
 CNST2 145.0000000  
 CNST11 1.0000000  
 D1 2.00000000 sec  
 D20 0.00689655 sec  
 TD0 1

===== CHANNEL f1 =====  
 SFO1 100.6228298 MHz  
 NUC1 13C  
 P1 10.00 usec  
 P2 20.00 usec  
 PLW1 50.27999878 W

===== CHANNEL f2 =====  
 SFO2 400.1316005 MHz  
 NUC2 1H  
 CPDPRG[2] waltz16  
 PCPD2 90.00 usec  
 PLW2 26.98999977 W  
 PLW12 0.33320999 W

F2 - Processing parameters  
 SI 32768  
 SF 100.6127507 MHz  
 WDW EM  
 SSB 0  
 LB 1.00 Hz  
 GB 0  
 PC 1.40

<sup>1</sup>H NMR spectrum of (E)-N,N-diphenyl-4-(2-(5'-vinyl-[1,1':4',1''-terphenyl]-2'-yl)vinyl)aniline (DPA-DPS-V)

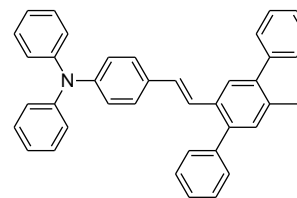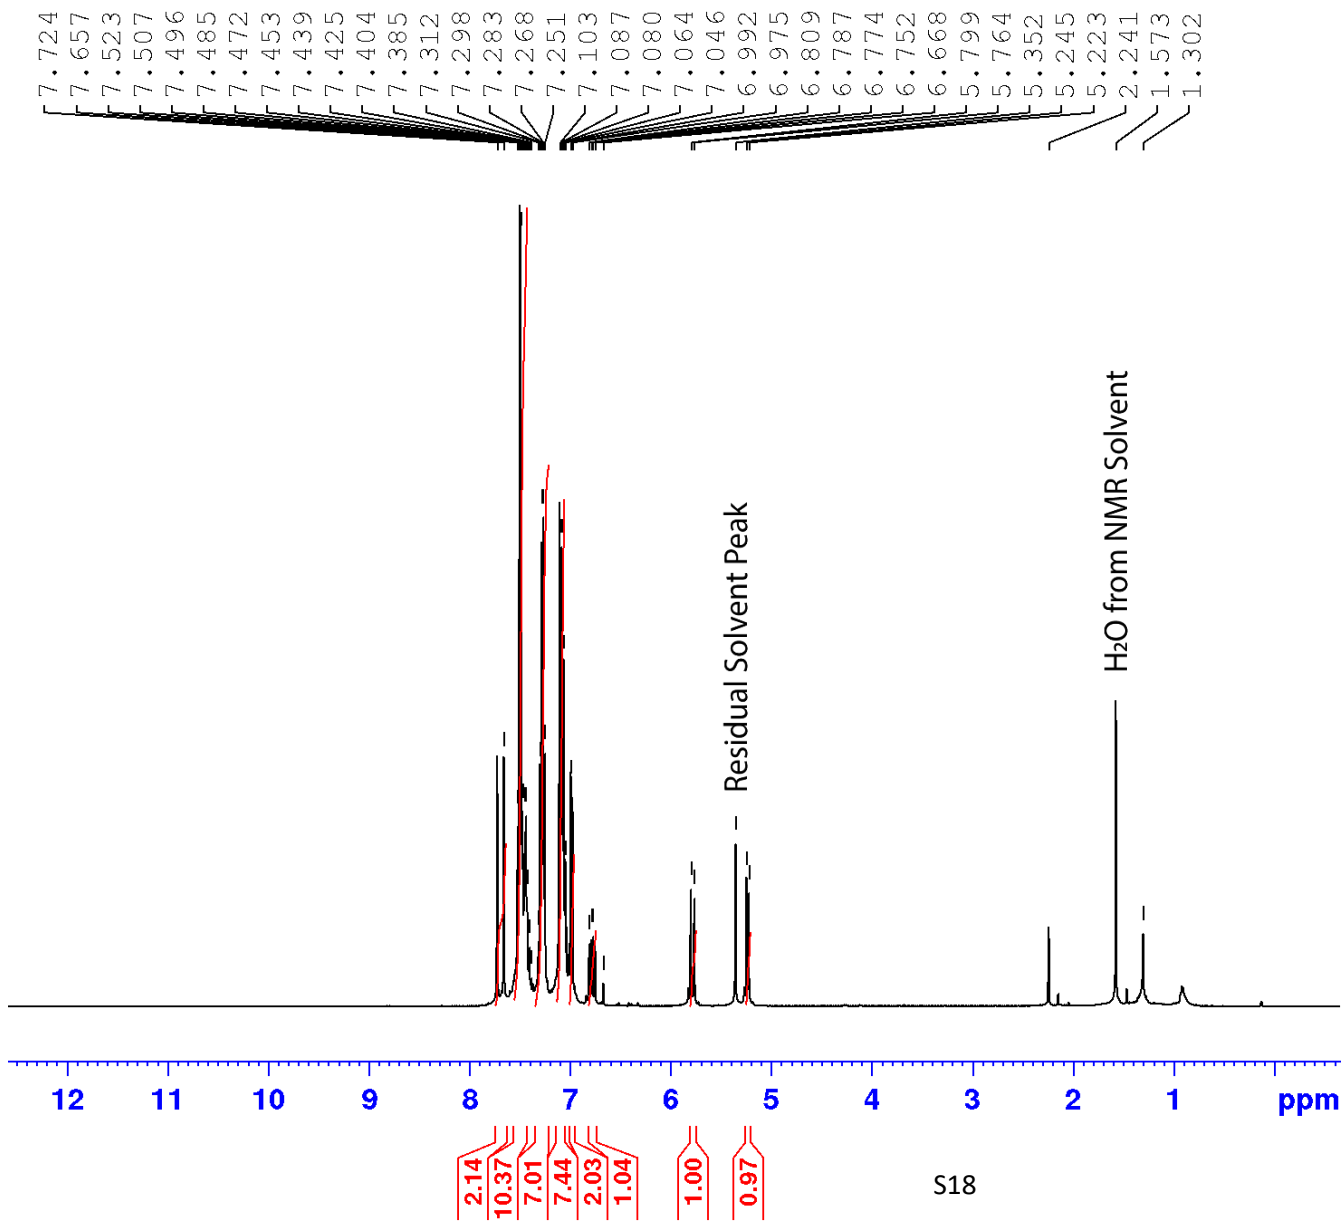

Current Data Parameters  
 NAME DPP  
 EXPNO 79  
 PROCNO 4

F2 - Acquisition Parameters  
 Date\_ 20191023  
 Time 6.37  
 INSTRUM spect  
 PROBHD 5 mm CPPBBO BB  
 PULPROG zg30  
 TD 65536  
 SOLVENT CD2Cl2  
 NS 8  
 DS 2  
 SWH 10000.000 Hz  
 FIDRES 0.152588 Hz  
 AQ 3.2767999 sec  
 RG 33.7  
 DW 50.000 usec  
 DE 10.00 usec  
 TE 292.1 K  
 D1 1.00000000 sec  
 TD0 1

===== CHANNEL f1 =====  
 SFO1 500.2030889 MHz  
 NUC1 1H  
 P1 12.00 usec  
 PLW1 13.00000000 W

F2 - Processing parameters  
 SI 65536  
 SF 500.2000000 MHz  
 WDW EM  
 SSB 0  
 LB 0.30 Hz  
 GB 0  
 PC 1.00

<sup>1</sup>H NMR spectrum of aromatic part of (E)-N,N-diphenyl-4-(2-(5'-vinyl-[1,1':4',1''-terphenyl]-2'-yl)vinyl)aniline (DPA-DPS-V)

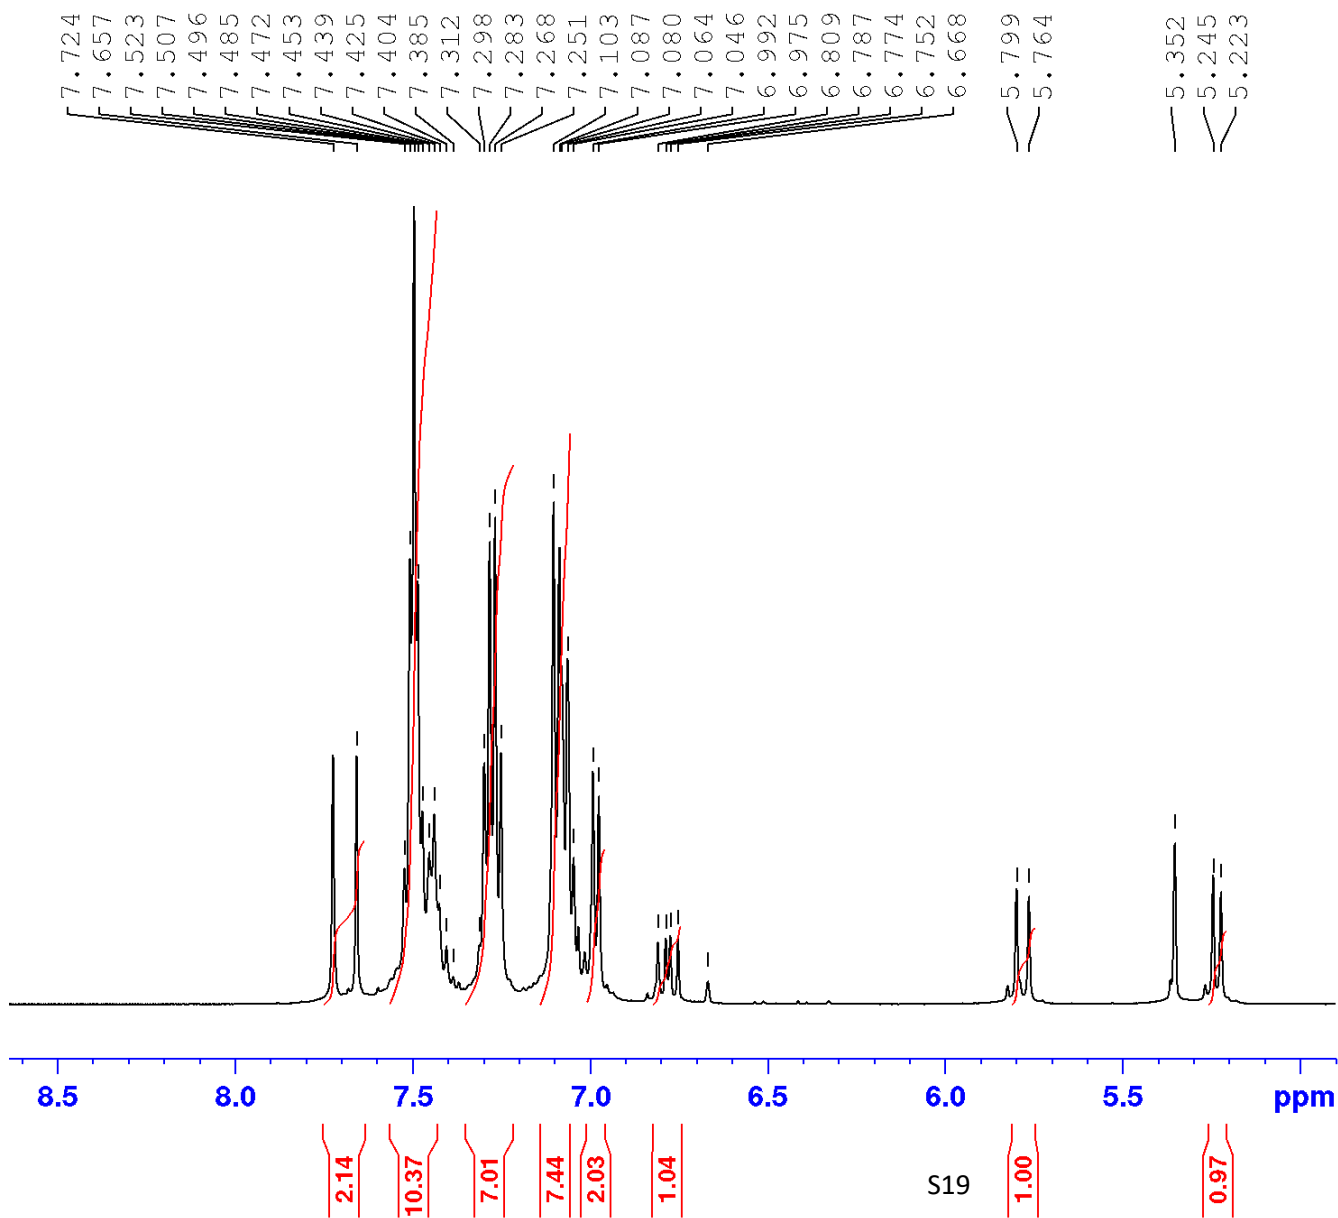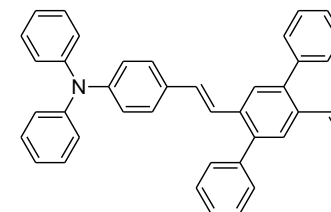

Current Data Parameters  
 NAME DPP  
 EXPNO 79  
 PROCNO 4

F2 - Acquisition Parameters  
 Date\_ 20191023  
 Time 6.37  
 INSTRUM spect  
 PROBHD 5 mm CPPBBO BB  
 PULPROG zg30  
 TD 65536  
 SOLVENT CD2Cl2  
 NS 8  
 DS 2  
 SWH 10000.000 Hz  
 FIDRES 0.152588 Hz  
 AQ 3.2767999 sec  
 RG 33.7  
 DW 50.000 usec  
 DE 10.00 usec  
 TE 292.1 K  
 D1 1.00000000 sec  
 TD0 1

===== CHANNEL f1 =====  
 SF01 500.2030889 MHz  
 NUC1 1H  
 P1 12.00 usec  
 PLW1 13.00000000 W

F2 - Processing parameters  
 SI 65536  
 SF 500.2000000 MHz  
 WDW EM  
 SSB 0  
 LB 0.30 Hz  
 GB 0  
 PC 1.00

<sup>13</sup>C NMR spectrum of (E)-N,N-diphenyl-4-(2-(5'-vinyl-[1,1':4',1''-terphenyl]-2'-yl)vinyl)aniline (DPA-DPS-V)

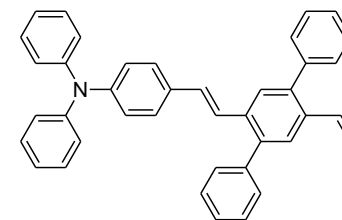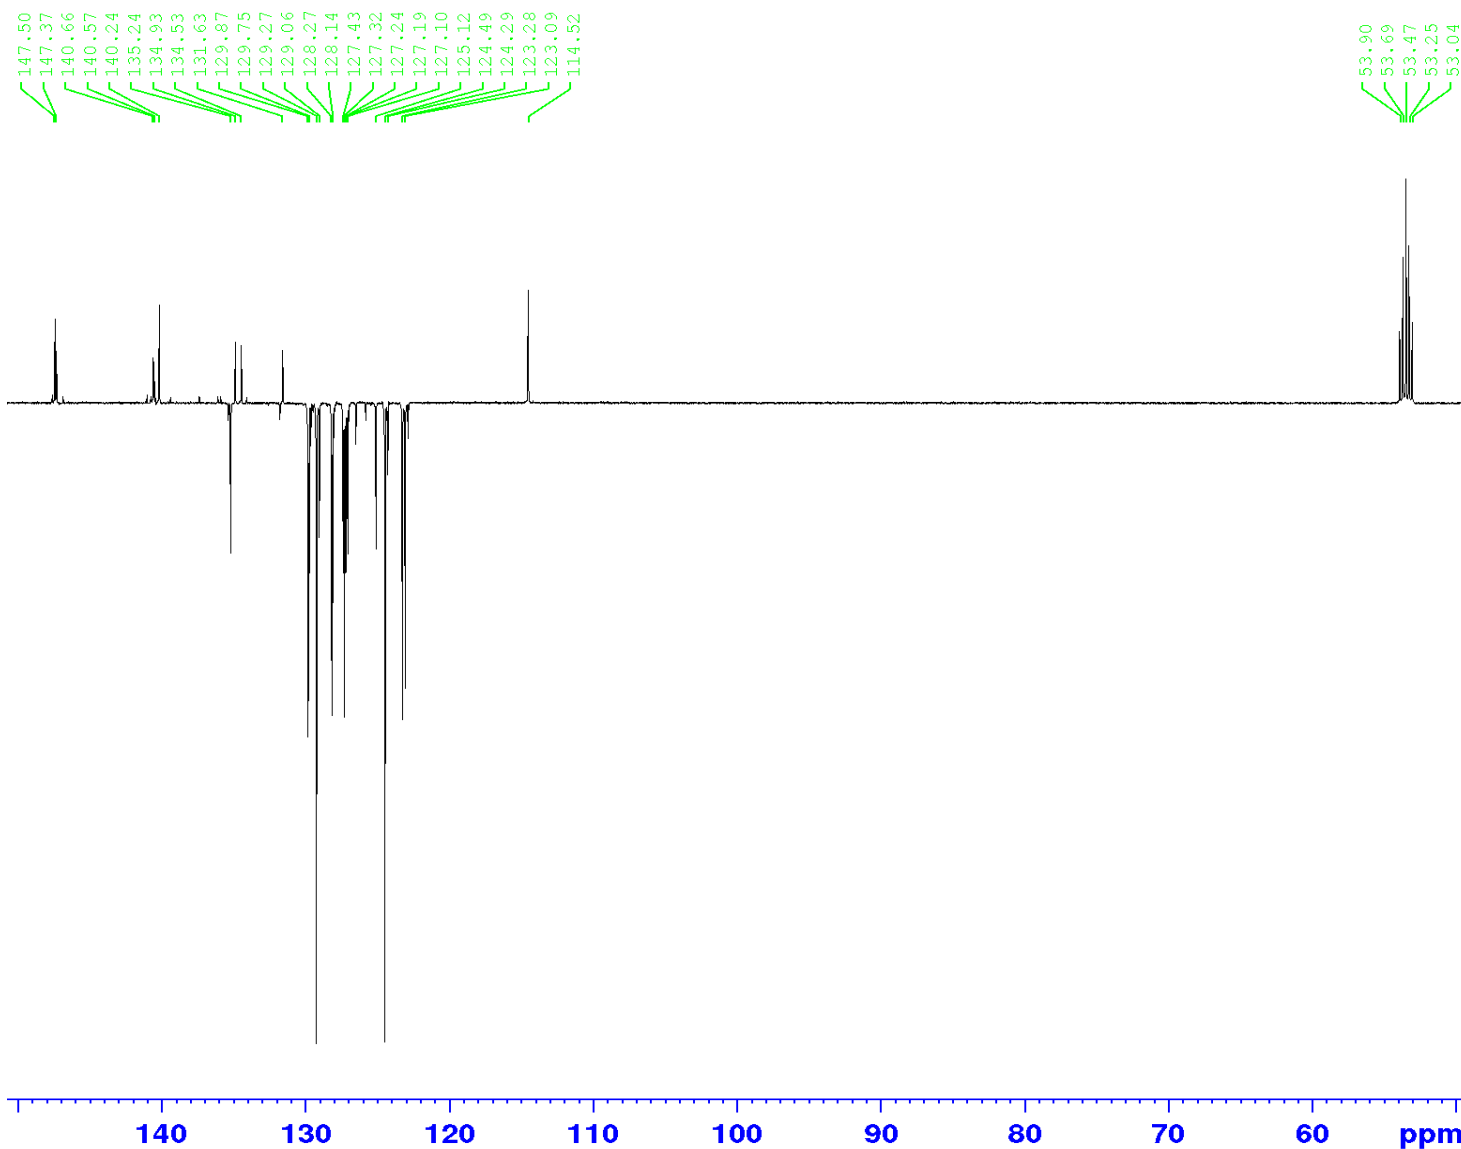

Current Data Parameters  
 NAME DPP  
 EXPNO 80  
 PROCNO 4

F2 - Acquisition Parameters  
 Date\_ 20191023  
 Time 6.43  
 INSTRUM spect  
 PROBHD 5 mm CPPBBO BB  
 PULPROG jmod  
 TD 65536  
 SOLVENT CD2Cl2  
 NS 2418  
 DS 4  
 SWH 29761.904 Hz  
 FIDRES 0.454131 Hz  
 AQ 1.1010048 sec  
 RG 2050  
 DW 16.800 usec  
 DE 18.00 usec  
 TE 292.1 K  
 CNST2 145.0000000  
 CNST11 1.0000000  
 D1 2.0000000 sec  
 D20 0.00689655 sec  
 TD0 1

===== CHANNEL f1 =====  
 SFO1 125.7879676 MHz  
 NUC1 13C  
 P1 10.00 usec  
 P2 20.00 usec  
 PLW1 40.00000000 W

===== CHANNEL f2 =====  
 SFO2 500.2020008 MHz  
 NUC2 1H  
 CPDPRG[2] waltz16  
 PCPD2 80.00 usec  
 PLW2 13.00000000 W  
 PLW12 0.29249999 W

F2 - Processing parameters  
 SI 32768  
 SF 125.7753900 MHz  
 WDW EM  
 SSB 0  
 LB 1.00 Hz  
 GB 0  
 PC 1.40

<sup>13</sup>C NMR spectrum of aromatic part of (*E*)-*N,N*-diphenyl-4-(2-(5'-vinyl-[1,1':4',1''-terphenyl]-2'-yl)vinyl)aniline (DPA-DPS-V)

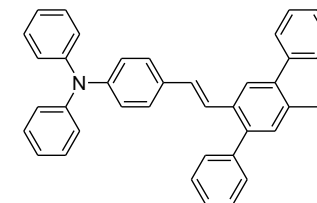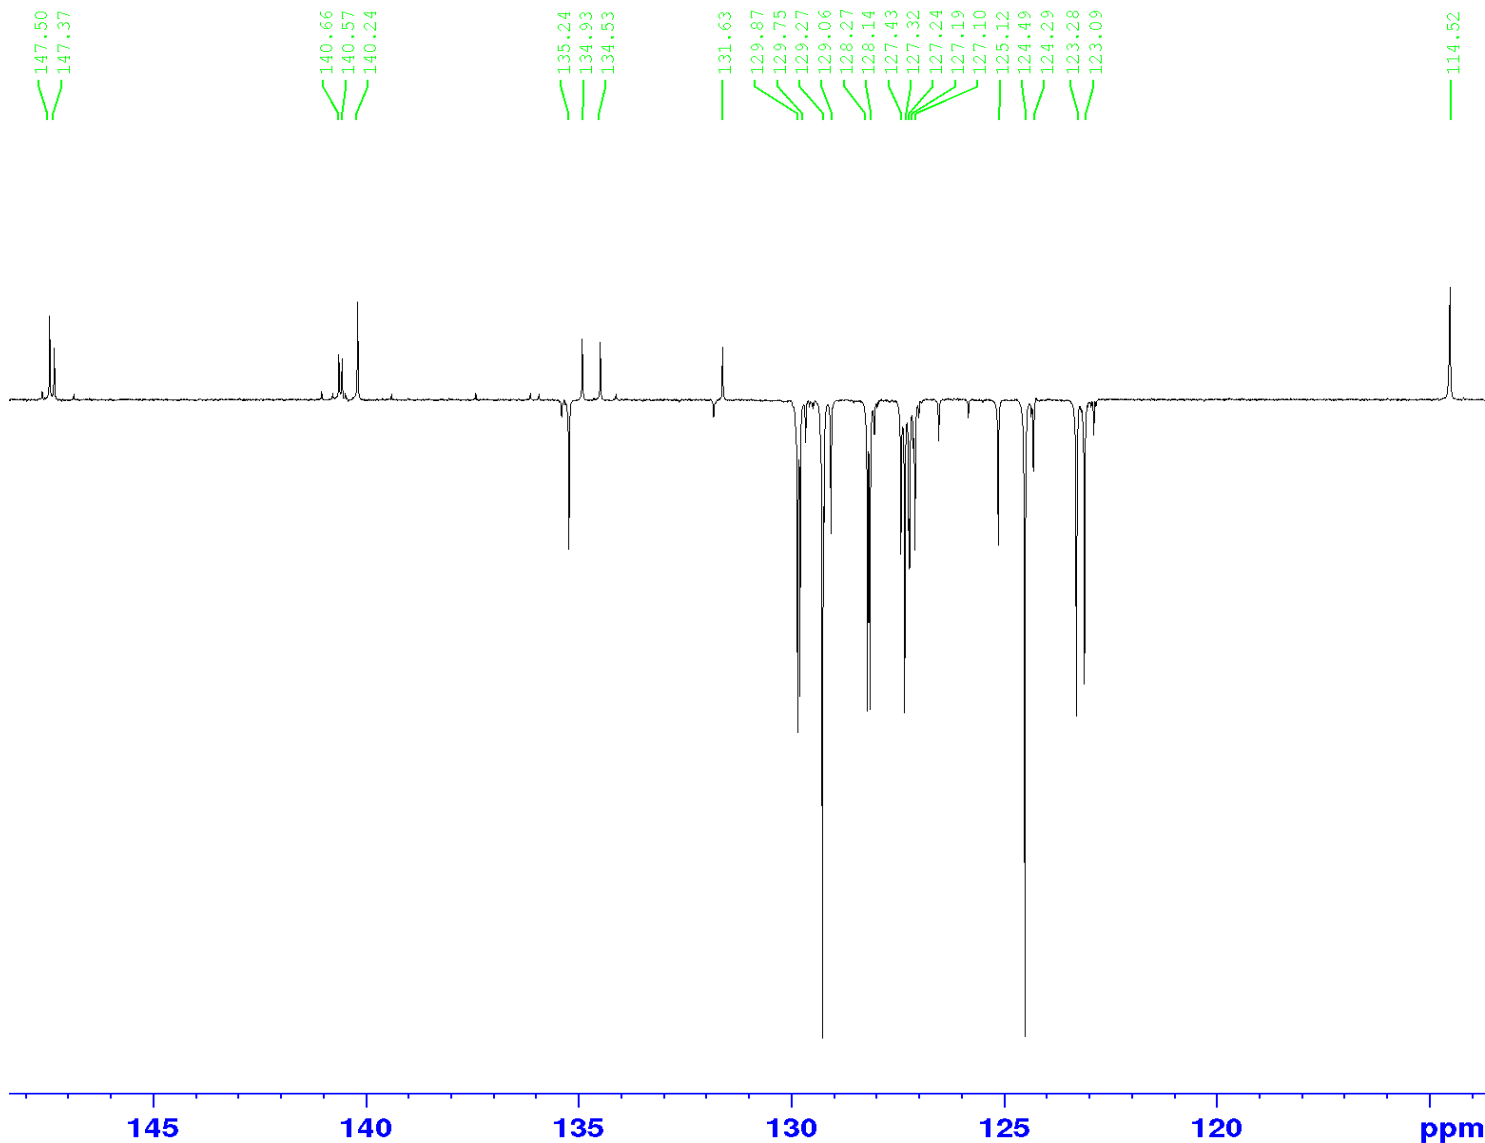

Current Data Parameters  
 NAME DPP  
 EXPNO 80  
 PROCNO 4

F2 - Acquisition Parameters  
 Date\_ 20191023  
 Time 6.43  
 INSTRUM spect  
 PROBHD 5 mm CPPBBO BB  
 PULPROG jmod  
 TD 65536  
 SOLVENT CD2C12  
 NS 2418  
 DS 4  
 SWH 29761.904 Hz  
 FIDRES 0.454131 Hz  
 AQ 1.1010048 sec  
 RG 2050  
 DW 16.800 usec  
 DE 18.00 usec  
 TE 292.1 K  
 CNST2 145.0000000  
 CNST11 1.0000000  
 D1 2.00000000 sec  
 D20 0.00689655 sec  
 TDO 1

==== CHANNEL f1 =====  
 SFO1 125.7879676 MHz  
 NUC1 13C  
 P1 10.00 usec  
 P2 20.00 usec  
 PLW1 40.00000000 W

==== CHANNEL f2 =====  
 SFO2 500.2020008 MHz  
 NUC2 1H  
 CPDPRG[2] waltz16  
 PCPD2 80.00 usec  
 PLW2 13.00000000 W  
 PLW12 0.29249999 W

F2 - Processing parameters  
 SI 32768  
 SF 125.7753900 MHz  
 WDW EM  
 SSB 0  
 LB 1.00 Hz  
 GB 0  
 PC 1.40

<sup>1</sup>H NMR spectrum of Ethyl (E)-2-cyano-3-(5'-((E)-4-(diphenylamino)styryl)-[1,1':4',1''-terphenyl]-2'-yl)acrylate (DPA-DPS-CEV)

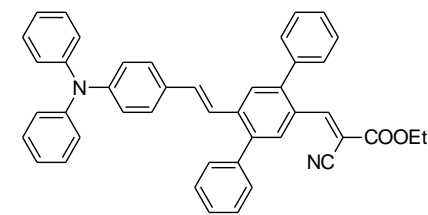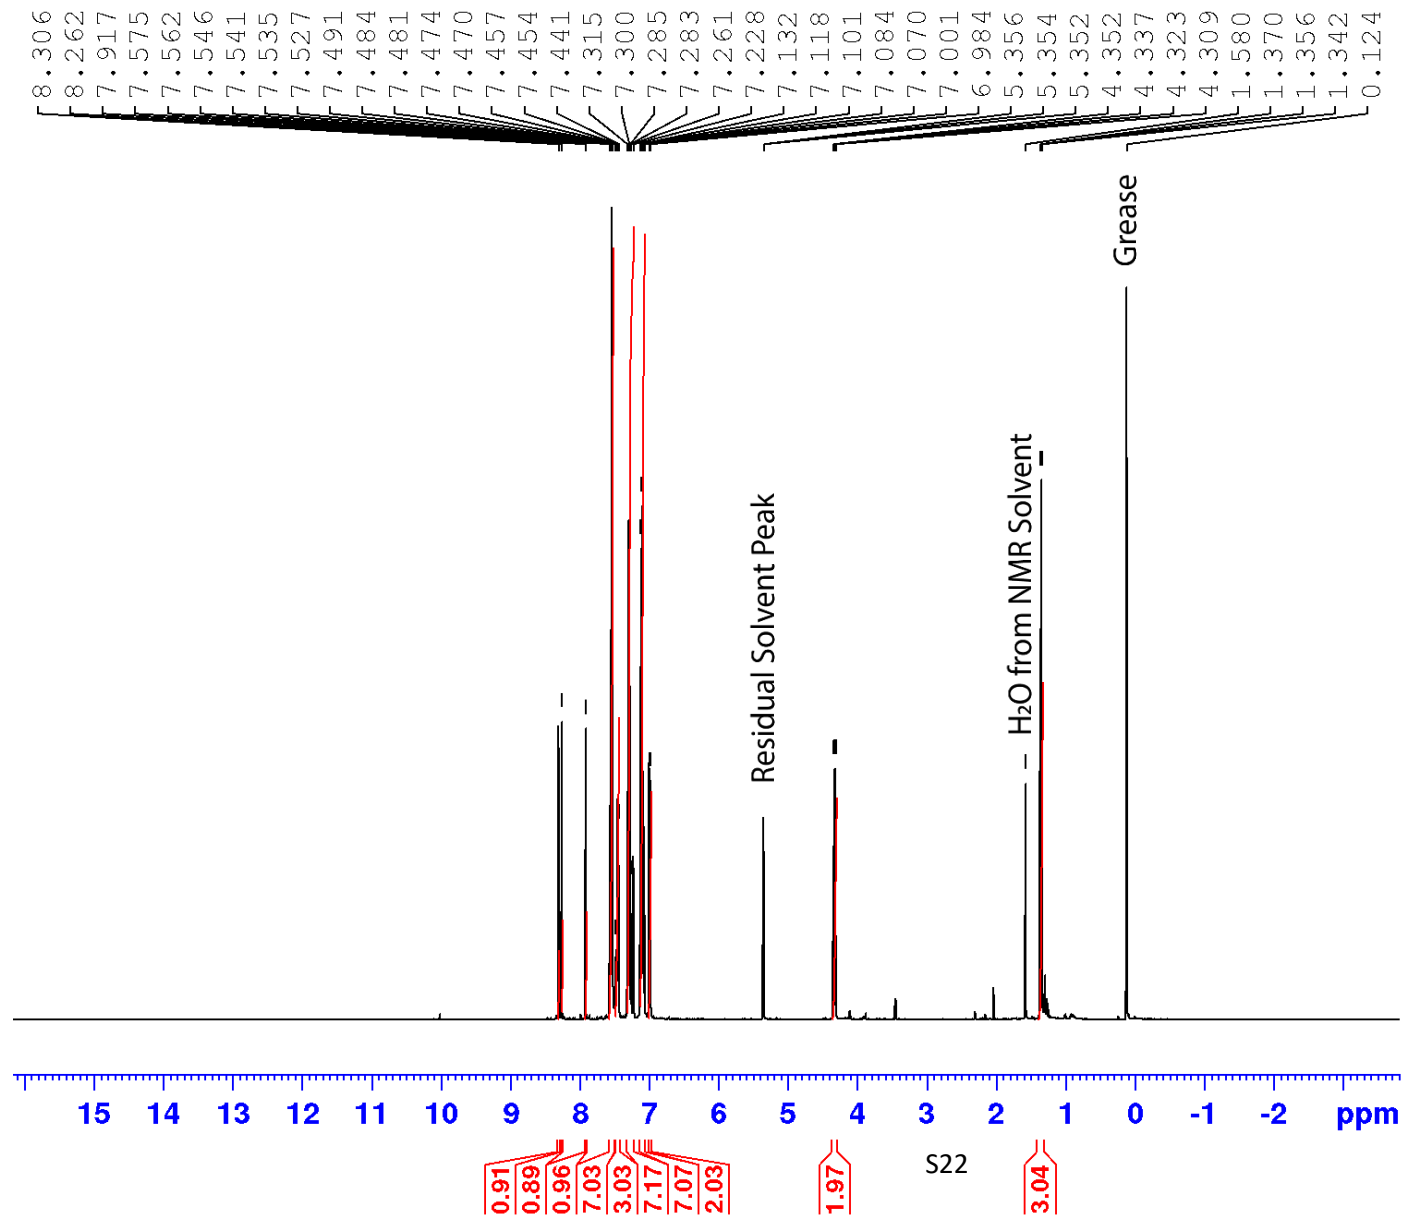

Current Data Parameters  
 NAME DPP  
 EXPNO 154  
 PROCNO 4

F2 - Acquisition Parameters  
 Date\_ 20210309  
 Time 8.30  
 INSTRUM spect  
 PROBHD 5 mm CPPBBO BB  
 PULPROG zg30  
 TD 65536  
 SOLVENT CD2Cl2  
 NS 8  
 DS 2  
 SWH 10000.000 Hz  
 FIDRES 0.152588 Hz  
 AQ 3.2767999 sec  
 RG 38.51  
 DW 50.000 usec  
 DE 10.00 usec  
 TE 291.8 K  
 D1 1.00000000 sec  
 TD0 1

===== CHANNEL f1 =====  
 SFO1 500.2030889 MHz  
 NUC1 1H  
 P1 12.00 usec  
 PLW1 13.00000000 W

F2 - Processing parameters  
 SI 65536  
 SF 500.2000000 MHz  
 WDW EM  
 SSB 0  
 LB 0.30 Hz  
 GB 0  
 PC 1.00

<sup>1</sup>H NMR spectrum of aromatic part of Ethyl (E)-2-cyano-3-(5'-((E)-4-(diphenylamino)styryl)-[1,1':4',1''-terphenyl]-2'-yl)acrylate (DPA-DPS-CEV)

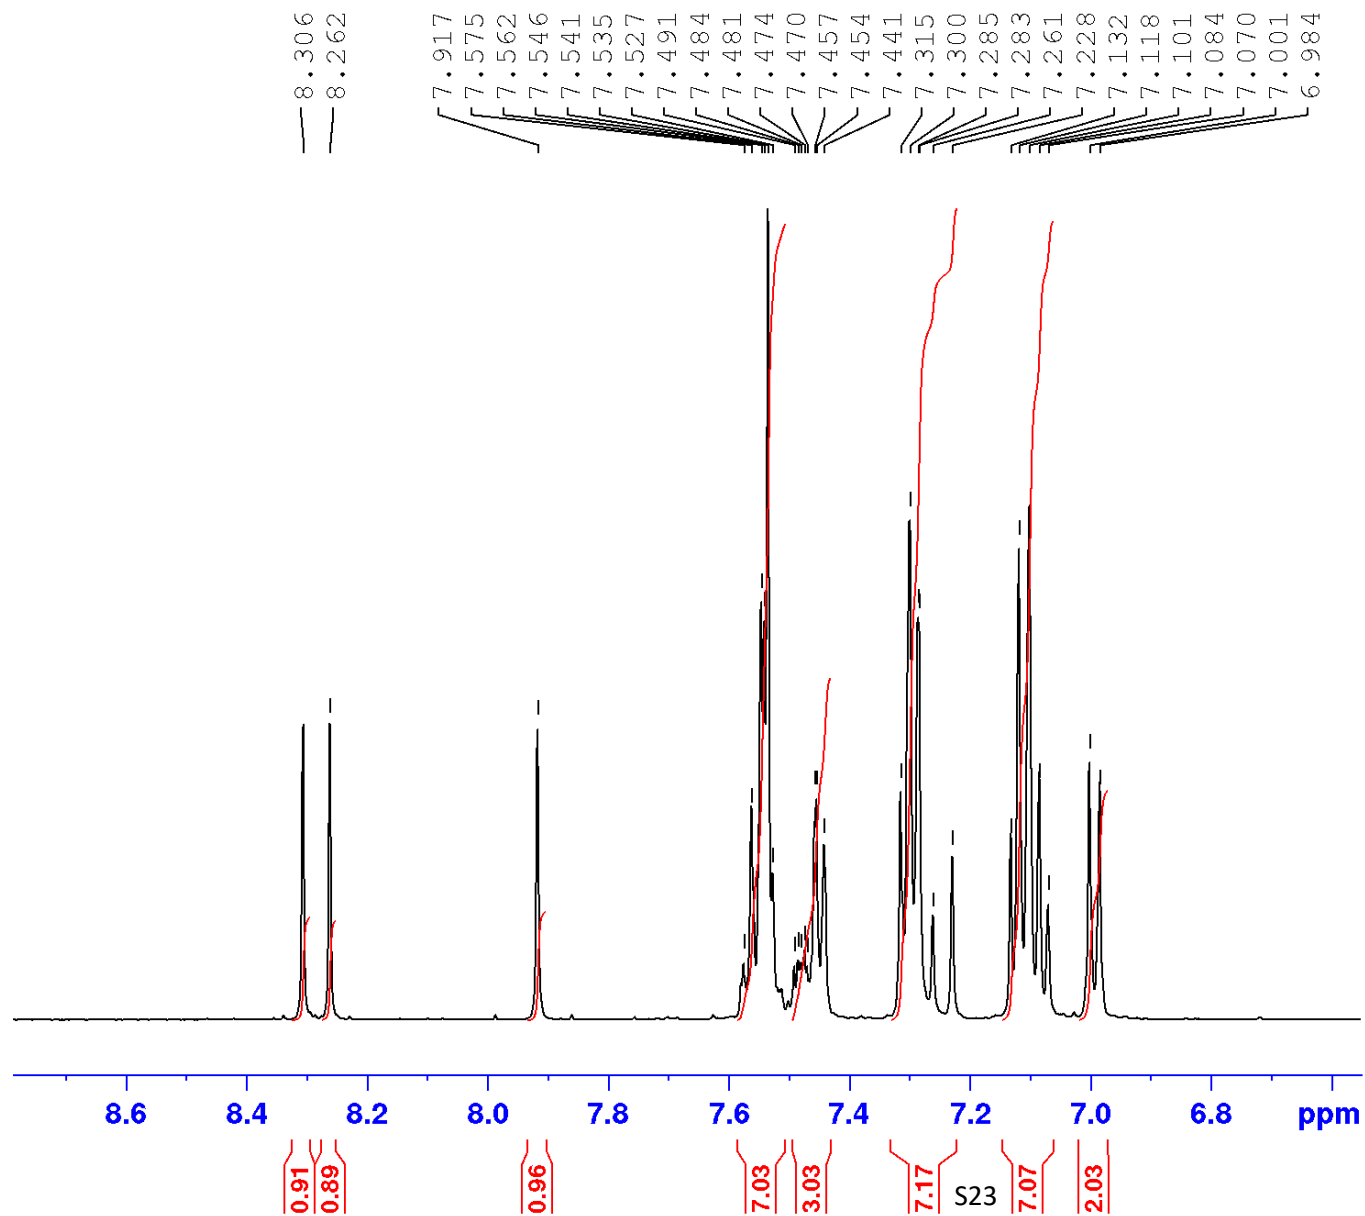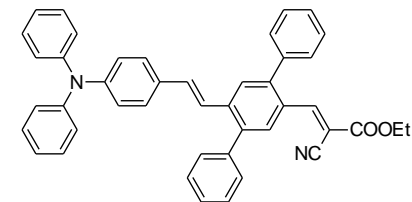

Current Data Parameters  
 NAME DPP  
 EXPNO 154  
 PROCNO 4

F2 - Acquisition Parameters  
 Date\_ 20210309  
 Time 8.30  
 INSTRUM spect  
 PROBHD 5 mm CPPBBO BB  
 PULPROG zg30  
 TD 65536  
 SOLVENT CD2Cl2  
 NS 8  
 DS 2  
 SWH 10000.000 Hz  
 FIDRES 0.152588 Hz  
 AQ 3.2767999 sec  
 RG 38.51  
 DW 50.000 usec  
 DE 10.00 usec  
 TE 291.8 K  
 D1 1.00000000 sec  
 TDO 1

===== CHANNEL f1 =====  
 SFO1 500.2030889 MHz  
 NUC1 1H  
 P1 12.00 usec  
 PLW1 13.00000000 W

F2 - Processing parameters  
 SI 65536  
 SF 500.2000000 MHz  
 WDW EM  
 SSB 0  
 LB 0.30 Hz  
 GB 0  
 PC 1.00

<sup>13</sup>C NMR spectrum of Ethyl (E)-2-cyano-3-(5'-((E)-4-(diphenylamino)styryl)-[1,1':4',1''-terphenyl]-2'-yl)acrylate (DPA-DPS-CEV)

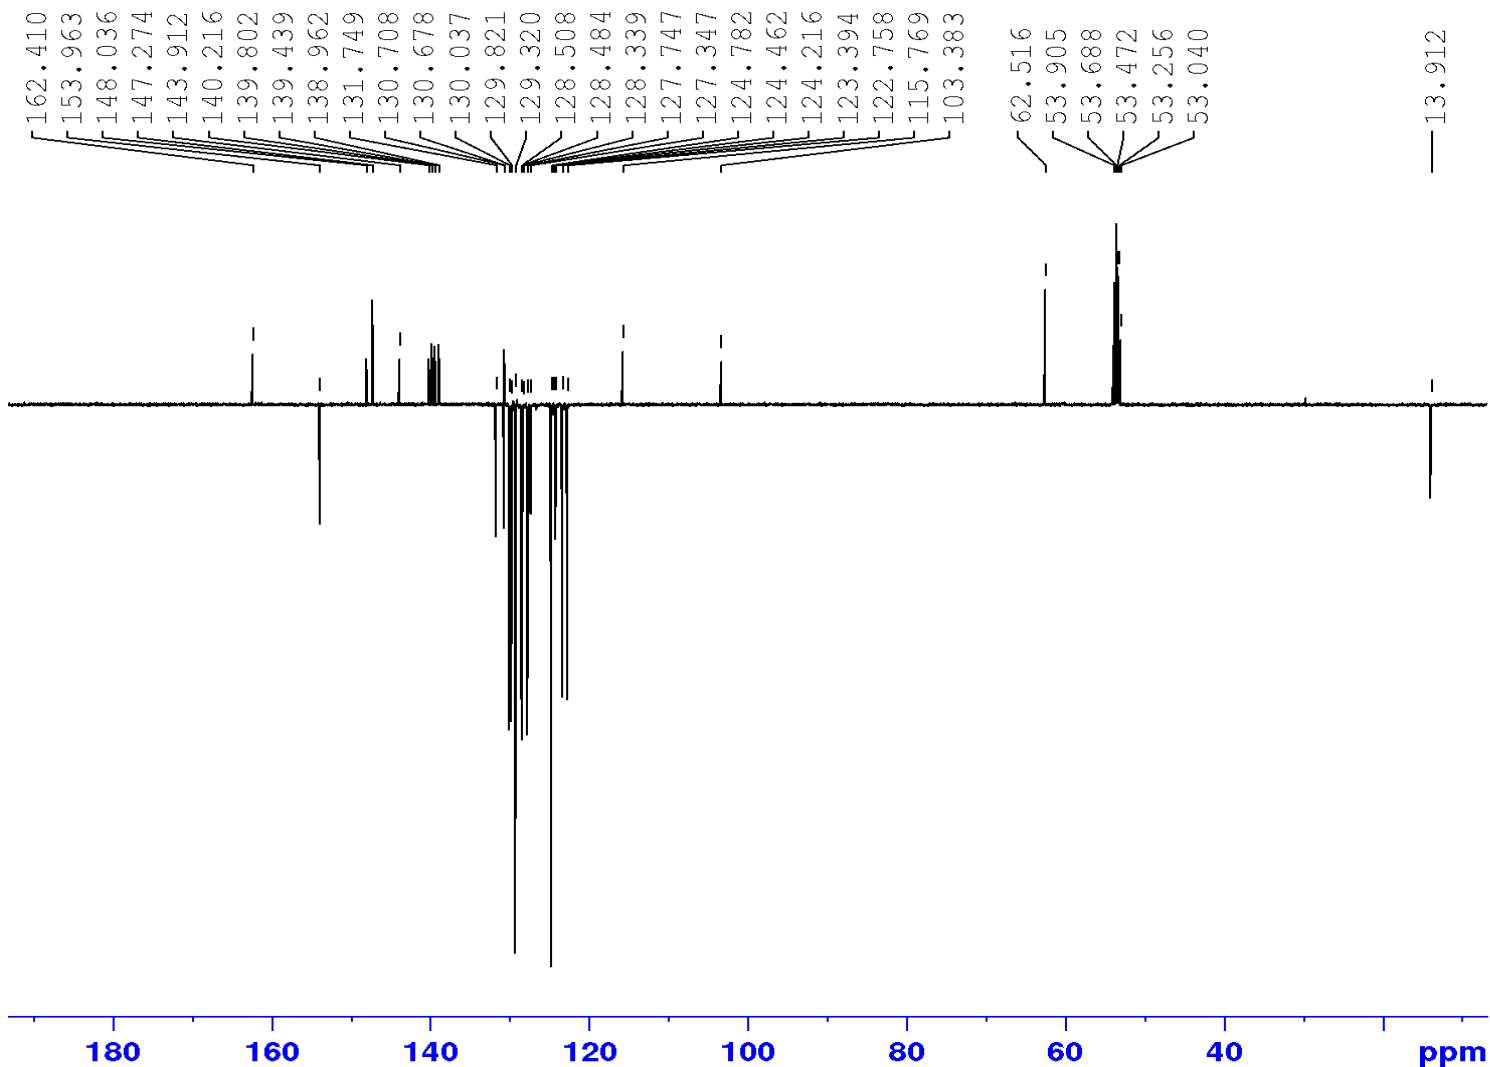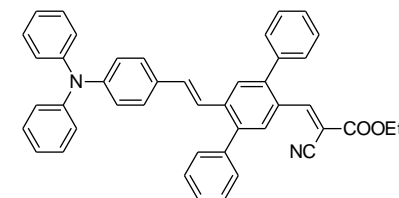

Current Data Parameters  
 NAME DPP  
 EXPNO 155  
 PROCNO 4

F2 - Acquisition Parameters  
 Date\_ 20210309  
 Time 8.31  
 INSTRUM spect  
 PROBHD 5 mm CPPBBO BB  
 PULPROG jmod  
 TD 65536  
 SOLVENT CD2Cl2  
 NS 624  
 DS 4  
 SWH 29761.904 Hz  
 FIDRES 0.454131 Hz  
 AQ 1.1010048 sec  
 RG 2050  
 DW 16.800 usec  
 DE 18.00 usec  
 TE 291.8 K  
 CNST2 145.0000000  
 CNST11 1.0000000  
 D1 2.00000000 sec  
 D20 0.00689655 sec  
 TD0 1

==== CHANNEL f1 =====  
 SFO1 125.7879676 MHz  
 NUC1 13C  
 P1 10.00 usec  
 P2 20.00 usec  
 PLW1 40.00000000 W

==== CHANNEL f2 =====  
 SFO2 500.2020008 MHz  
 NUC2 1H  
 CPDPRG[2] waltz16  
 PCPD2 80.00 usec  
 PLW2 13.00000000 W  
 PLW12 0.29249999 W

F2 - Processing parameters  
 SI 32768  
 SF 125.7753900 MHz  
 WDW EM  
 SSB 0  
 LB 1.00 Hz  
 GB 0  
 PC 1.40



<sup>13</sup>C NMR spectrum of aromatic part of Ethyl (*E*)-2-cyano-3-(5'-((*E*)-4-(diphenylamino)styryl)-[1,1':4',1''-terphenyl]-2'-yl)acrylate (**DPA-DPS-CEV**)

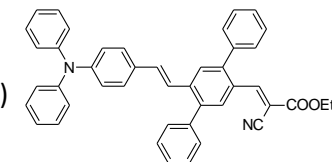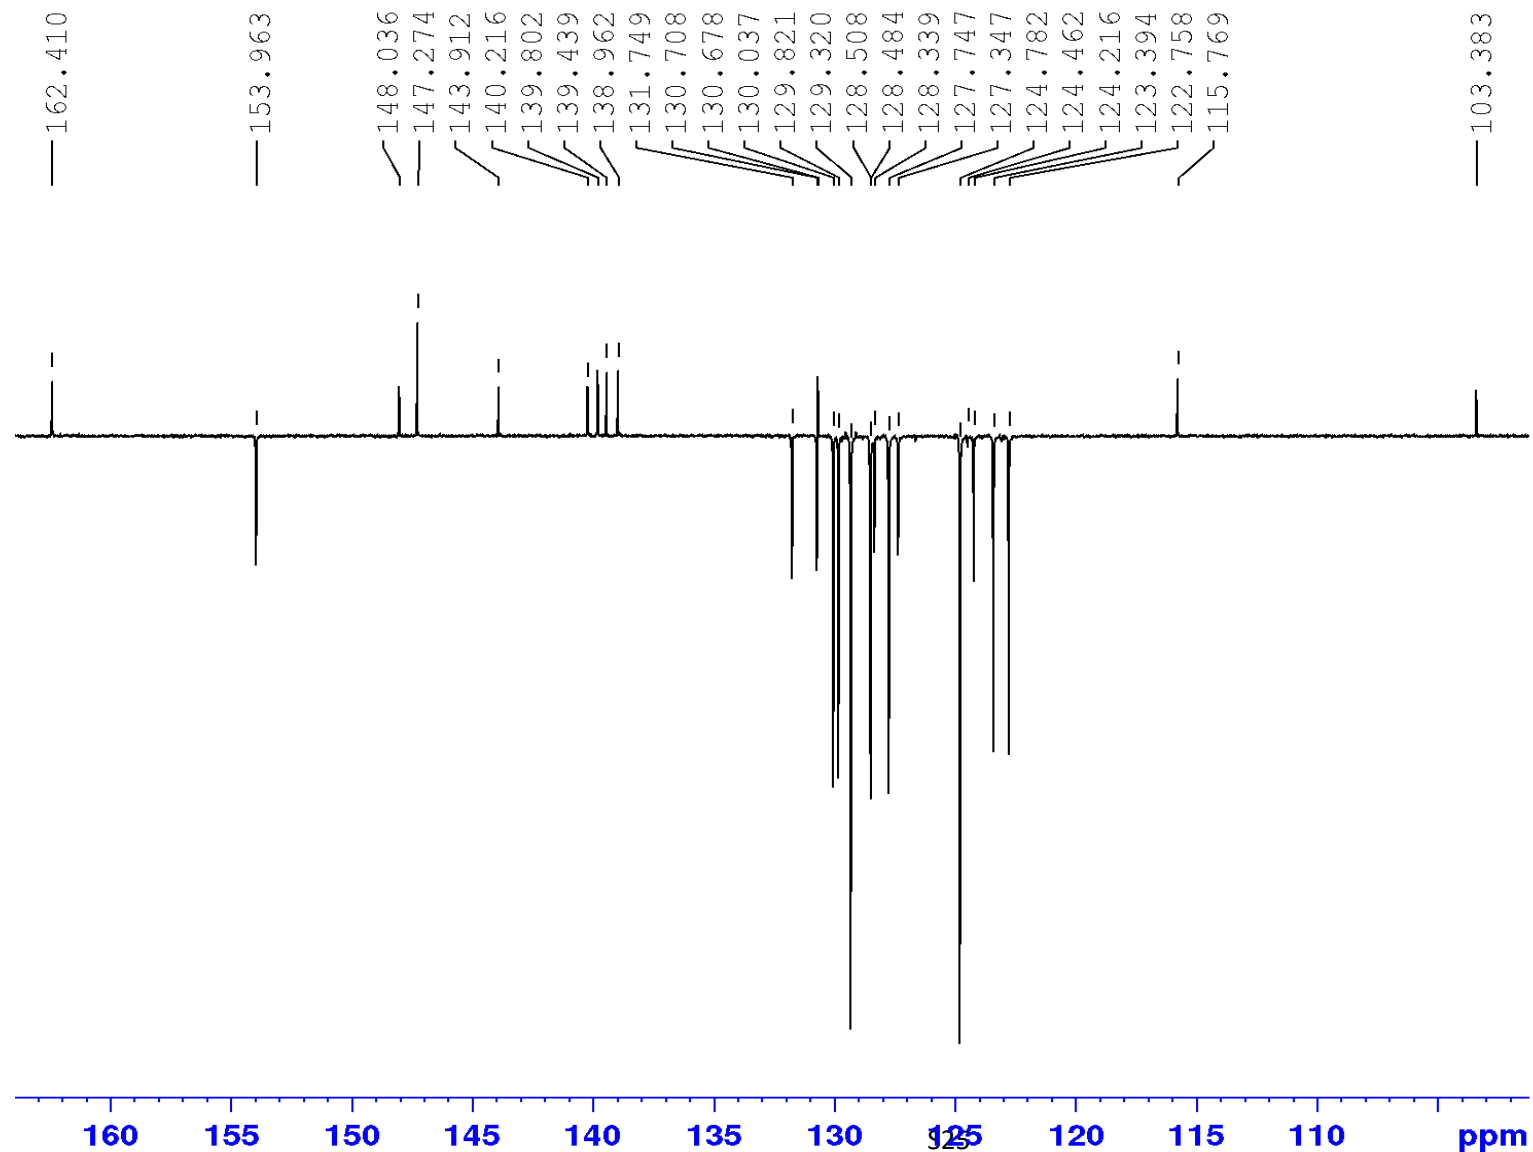

```

Current Data Parameters
NAME          DPP
EXPNO         155
PROCNO        4

F2 - Acquisition Parameters
Date_         20210309
Time          8.31
INSTRUM       spect
PROBHD        5 mm CPPBBO BB
PULPROG       jmod
TD            65536
SOLVENT       CD2C12
NS            624
DS            4
SWH           29761.904 Hz
FIDRES        0.454131 Hz
AQ            1.1010048 sec
RG            2050
DW            16.800 usec
DE            18.00 usec
TE            291.8 K
CNST2         145.0000000
CNST11        1.0000000
D1            2.00000000 sec
D20           0.00689655 sec
TD0           1

===== CHANNEL f1 =====
SFO1          125.7879676 MHz
NUC1           13C
P1             10.00 usec
P2             20.00 usec
PLW1          40.00000000 W

===== CHANNEL f2 =====
SFO2          500.2020008 MHz
NUC2           1H
CPDPRG[2]     waltz16
PCPD2         80.00 usec
PLW2          13.00000000 W
PLW12         0.29249999 W

F2 - Processing parameters
SI            32768
SF            125.7753900 MHz
WDW           EM
SSB           0
LB            1.00 Hz
GB            0
PC            1.40
    
```

<sup>1</sup>H NMR spectrum of Methyl (E)-2-cyano-3-(5'-((E)-4-(diphenylamino)styryl)-[1,1':4',1''-terphenyl]-2'-yl)acrylate (DPA-DPS-CMV)

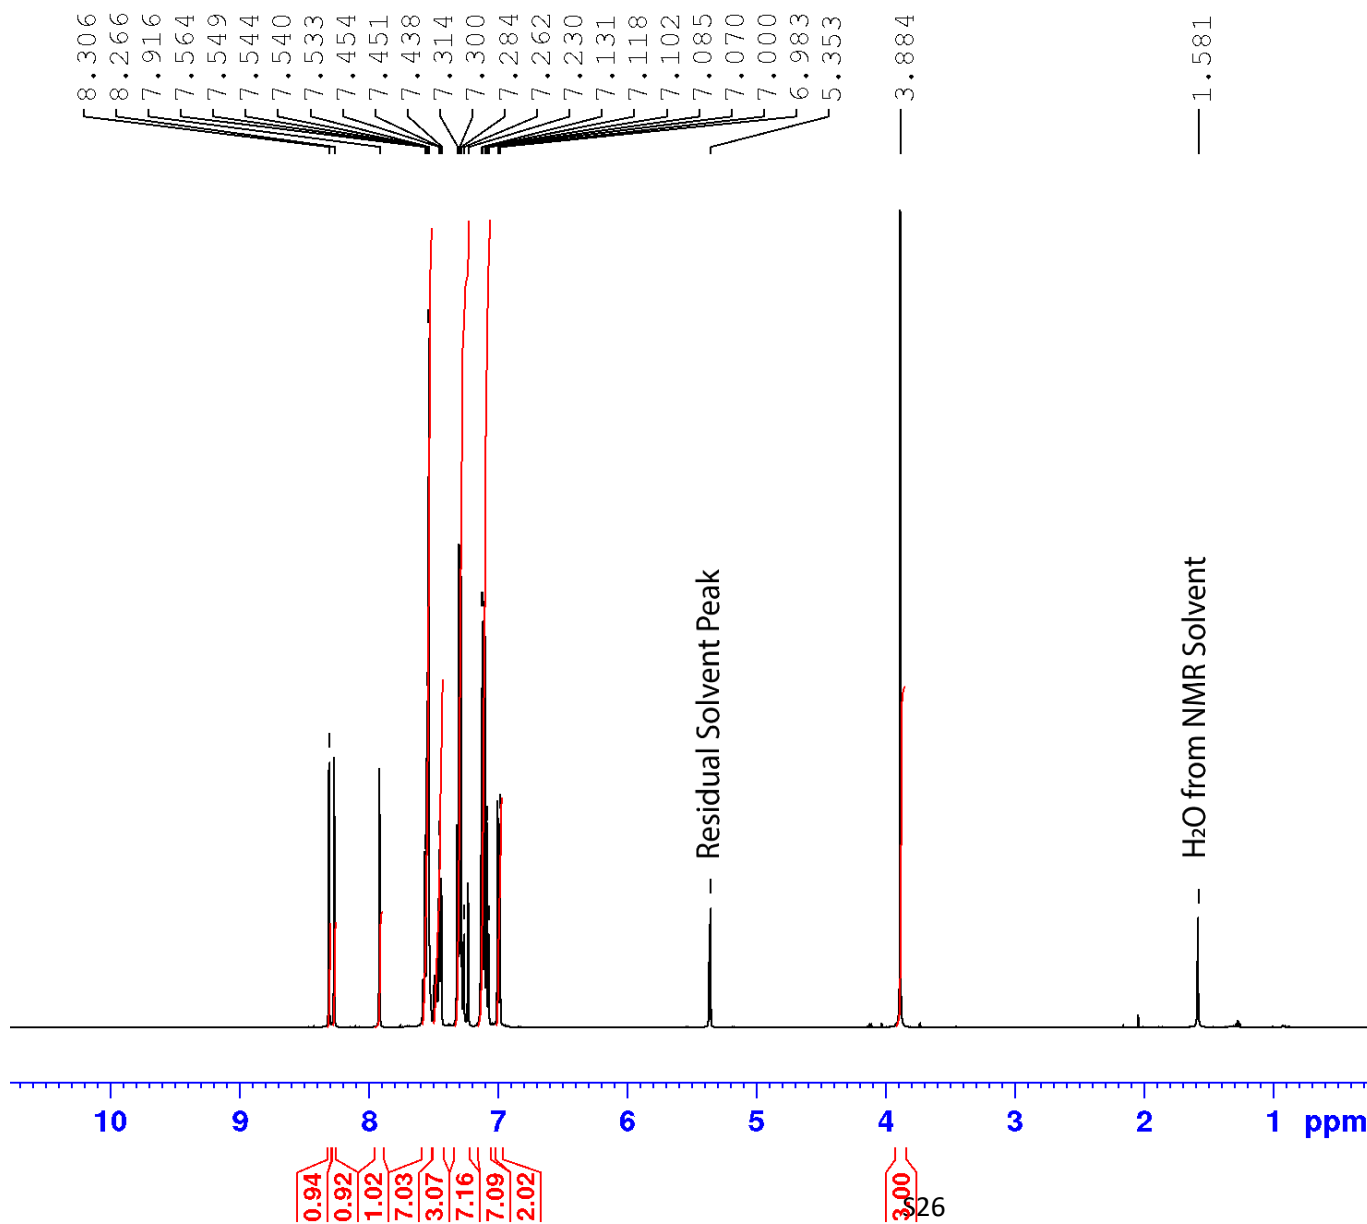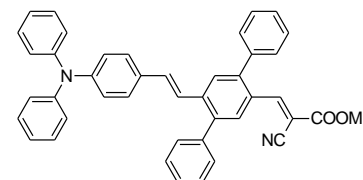

Current Data Parameters  
 NAME DPP  
 EXPNO 152  
 PROCNO 4

F2 - Acquisition Parameters  
 Date\_ 20210309  
 Time 8.09  
 INSTRUM spect  
 PROBHD 5 mm CPPBBO BB  
 PULPROG zg30  
 TD 65536  
 SOLVENT CD2C12  
 NS 8  
 DS 2  
 SWH 10000.000 Hz  
 FIDRES 0.152588 Hz  
 AQ 3.2767999 sec  
 RG 38.51  
 DW 50.000 usec  
 DE 10.00 usec  
 TE 291.6 K  
 D1 1.00000000 sec  
 TD0 1

===== CHANNEL f1 =====  
 SF01 500.2030889 MHz  
 NUC1 1H  
 P1 12.00 usec  
 PLW1 13.00000000 W

F2 - Processing parameters  
 SI 65536  
 SF 500.2000000 MHz  
 WDW EM  
 SSB 0  
 LB 0.30 Hz  
 GB 0  
 PC 1.00

<sup>1</sup>H NMR spectrum of aromatic part of Methyl (E)-2-cyano-3-(5'-((E)-4-(diphenylamino)styryl)-[1,1':4,1''-terphenyl]-2'-yl)acrylate (DPA-DPS-CMV)

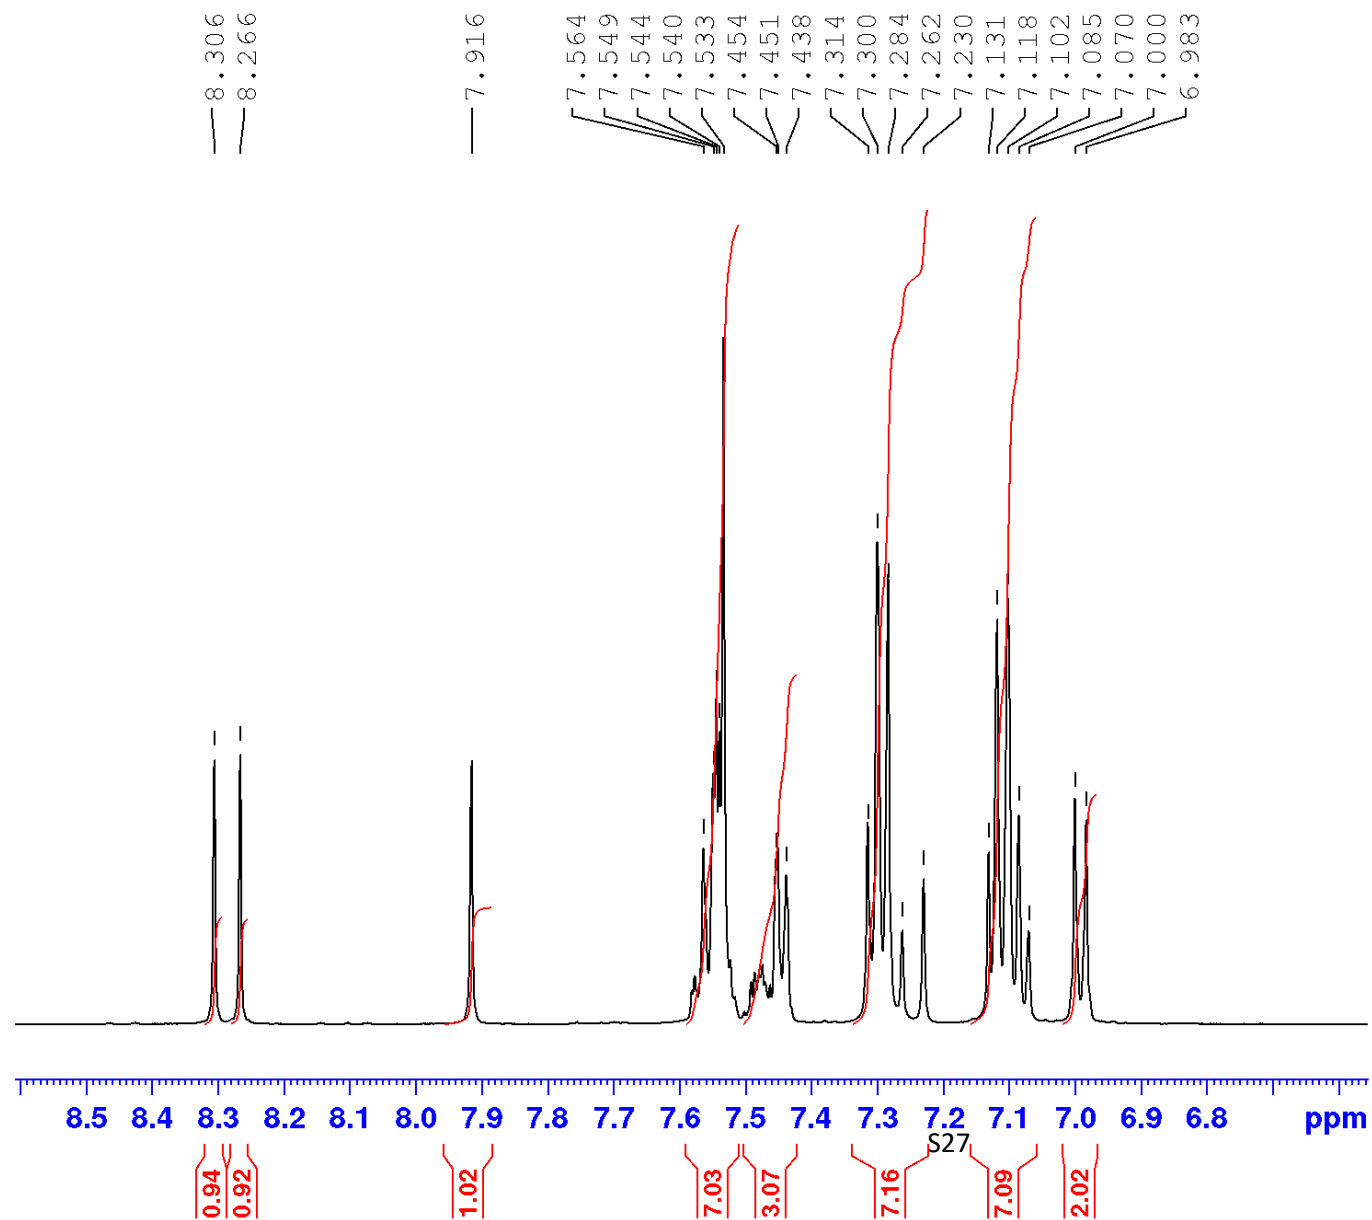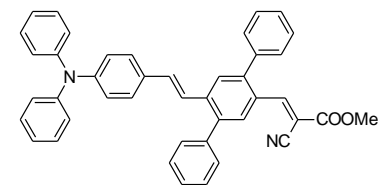

Current Data Parameters  
 NAME DPP  
 EXPNO 152  
 PROCNO 4

F2 - Acquisition Parameters  
 Date\_ 20210309  
 Time 8.09  
 INSTRUM spect  
 PROBHD 5 mm CPPBBO BB  
 PULPROG zg30  
 TD 65536  
 SOLVENT CD2Cl2  
 NS 8  
 DS 2  
 SWH 10000.000 Hz  
 FIDRES 0.152588 Hz  
 AQ 3.2767999 sec  
 RG 38.51  
 DW 50.000 usec  
 DE 10.00 usec  
 TE 291.6 K  
 D1 1.00000000 sec  
 TD0 1

===== CHANNEL f1 =====  
 SFO1 500.2030889 MHz  
 NUC1 1H  
 P1 12.00 usec  
 PLW1 13.00000000 W

F2 - Processing parameters  
 SI 65536  
 SF 500.2000000 MHz  
 WDW EM  
 SSB 0  
 LB 0.30 Hz  
 GB 0  
 PC 1.00

<sup>13</sup>C NMR spectrum of Methyl (E)-2-cyano-3-(5'-((E)-4-(diphenylamino)styryl)-[1,1':4,1''-terphenyl]-2'-yl)acrylate (DPA-DPS-CMV)

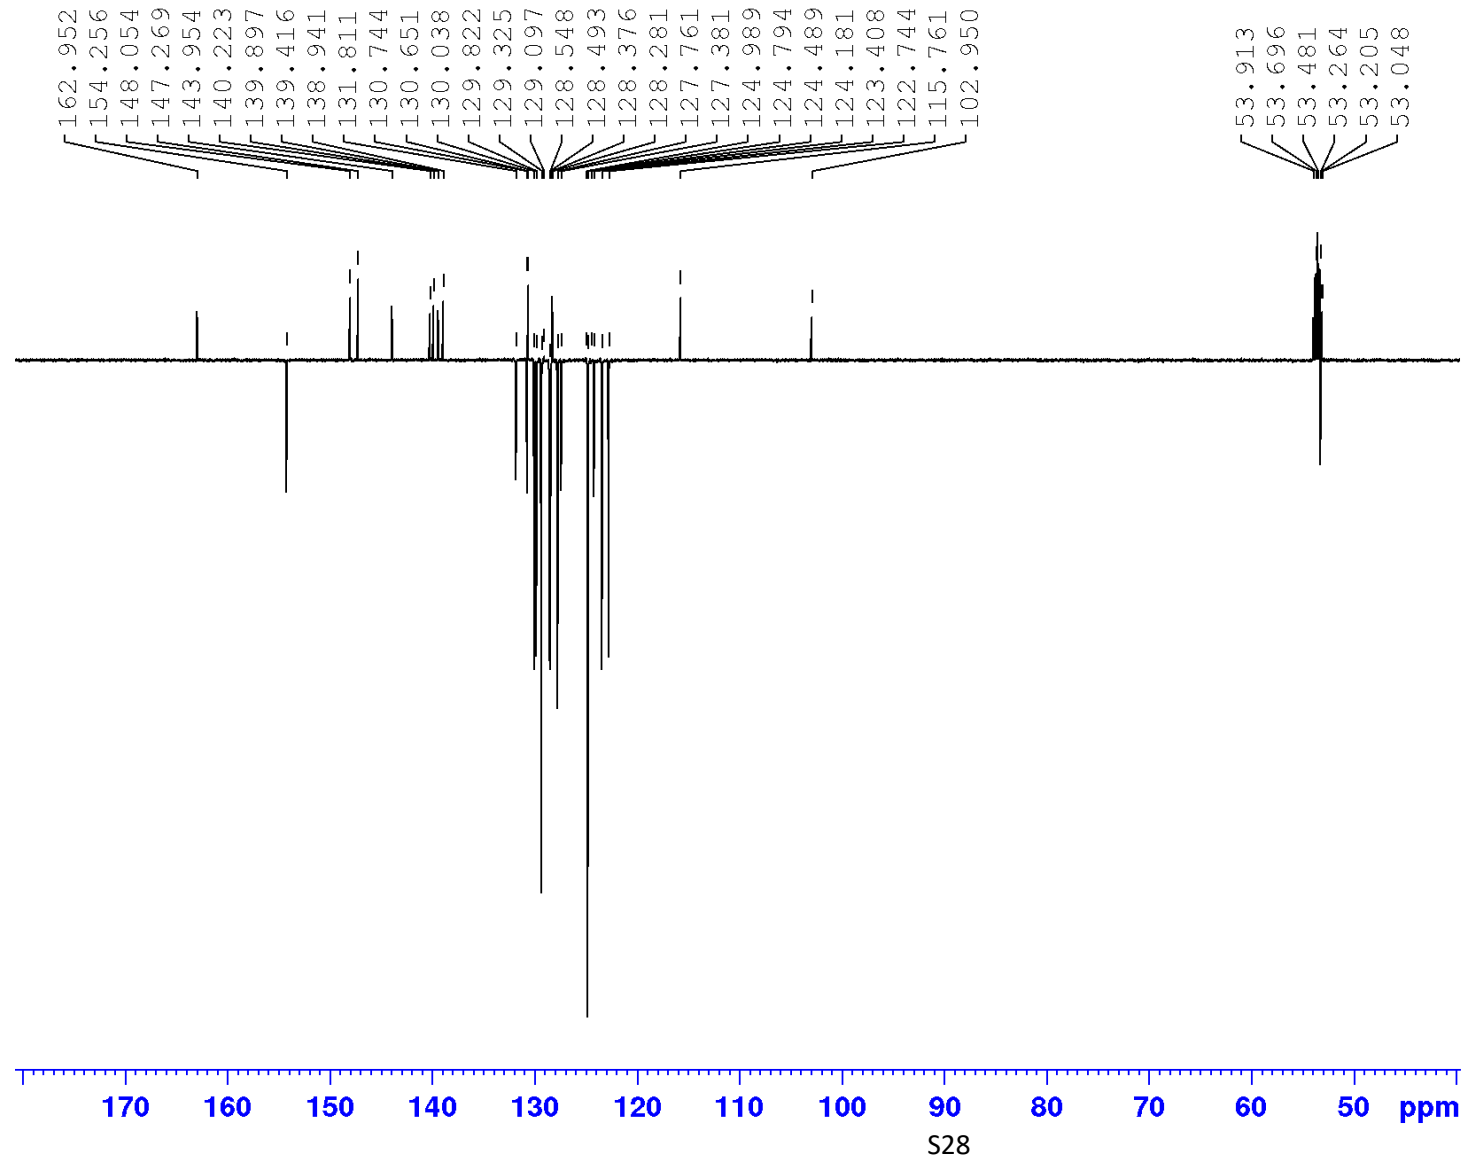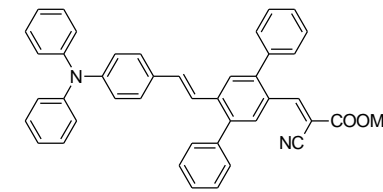

Current Data Parameters

NAME DPP  
EXPNO 153  
PROCNO 4

F2 - Acquisition Parameters

Date\_ 20210309  
Time 8.09  
INSTRUM spect  
PROBHD 5 mm CPPBBO BB  
PULPROG jmod  
TD 65536  
SOLVENT CD2Cl2  
NS 343  
DS 4  
SWH 29761.904 Hz  
FIDRES 0.454131 Hz  
AQ 1.1010048 sec  
RG 1820  
DW 16.800 usec  
DE 18.00 usec  
TE 291.6 K  
CNST2 145.0000000  
CNST11 1.0000000  
D1 2.00000000 sec  
D20 0.00689655 sec  
TD0 1

===== CHANNEL f1 =====

SFO1 125.7879676 MHz  
NUC1 13C  
P1 10.00 usec  
P2 20.00 usec  
PLW1 40.00000000 W

===== CHANNEL f2 =====

SFO2 500.2020008 MHz  
NUC2 1H  
CPDPRG[2] waltz16  
PCPD2 80.00 usec  
PLW2 13.00000000 W  
PLW12 0.29249999 W

F2 - Processing parameters

SI 32768  
SF 125.7753900 MHz  
WDW EM  
SSB 0  
LB 1.00 Hz  
GB 0  
PC 1.40

<sup>13</sup>C NMR spectrum of aromatic part of Methyl (E)-2-cyano-3-(5'-((E)-4-(diphenylamino)styryl)-[1,1':4',1''-terphenyl]-2'-yl)acrylate (DPA-DPS-CMV)

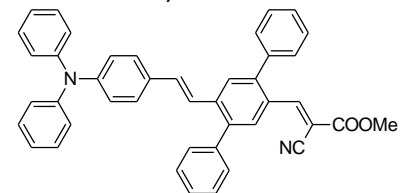

Current Data Parameters  
 NAME DPP  
 EXPNO 153  
 PROCNO 4

F2 - Acquisition Parameters  
 Date\_ 20210309  
 Time 8.09  
 INSTRUM spect  
 PROBHD 5 mm CPPBBO BB  
 PULPROG jmod  
 TD 65536  
 SOLVENT CD2C12  
 NS 343  
 DS 4  
 SWH 29761.904 Hz  
 FIDRES 0.454131 Hz  
 AQ 1.1010048 sec  
 RG 1820  
 DW 16.800 usec  
 DE 18.00 usec  
 TE 291.6 K  
 CNST2 145.0000000  
 CNST11 1.0000000  
 D1 2.00000000 sec  
 D20 0.00689655 sec  
 TD0 1

==== CHANNEL f1 =====  
 SFO1 125.7879676 MHz  
 NUC1 13C  
 P1 10.00 usec  
 P2 20.00 usec  
 PLW1 40.00000000 W

==== CHANNEL f2 =====  
 SFO2 500.2020008 MHz  
 NUC2 1H  
 CPDPRG[2] waltz16  
 PCPD2 80.00 usec  
 PLW2 13.00000000 W  
 PLW12 0.29249999 W

F2 - Processing parameters  
 SI 32768  
 SF 125.7753900 MHz  
 WDW EM  
 SSB 0  
 LB 1.00 Hz  
 GB 0  
 PC 1.40

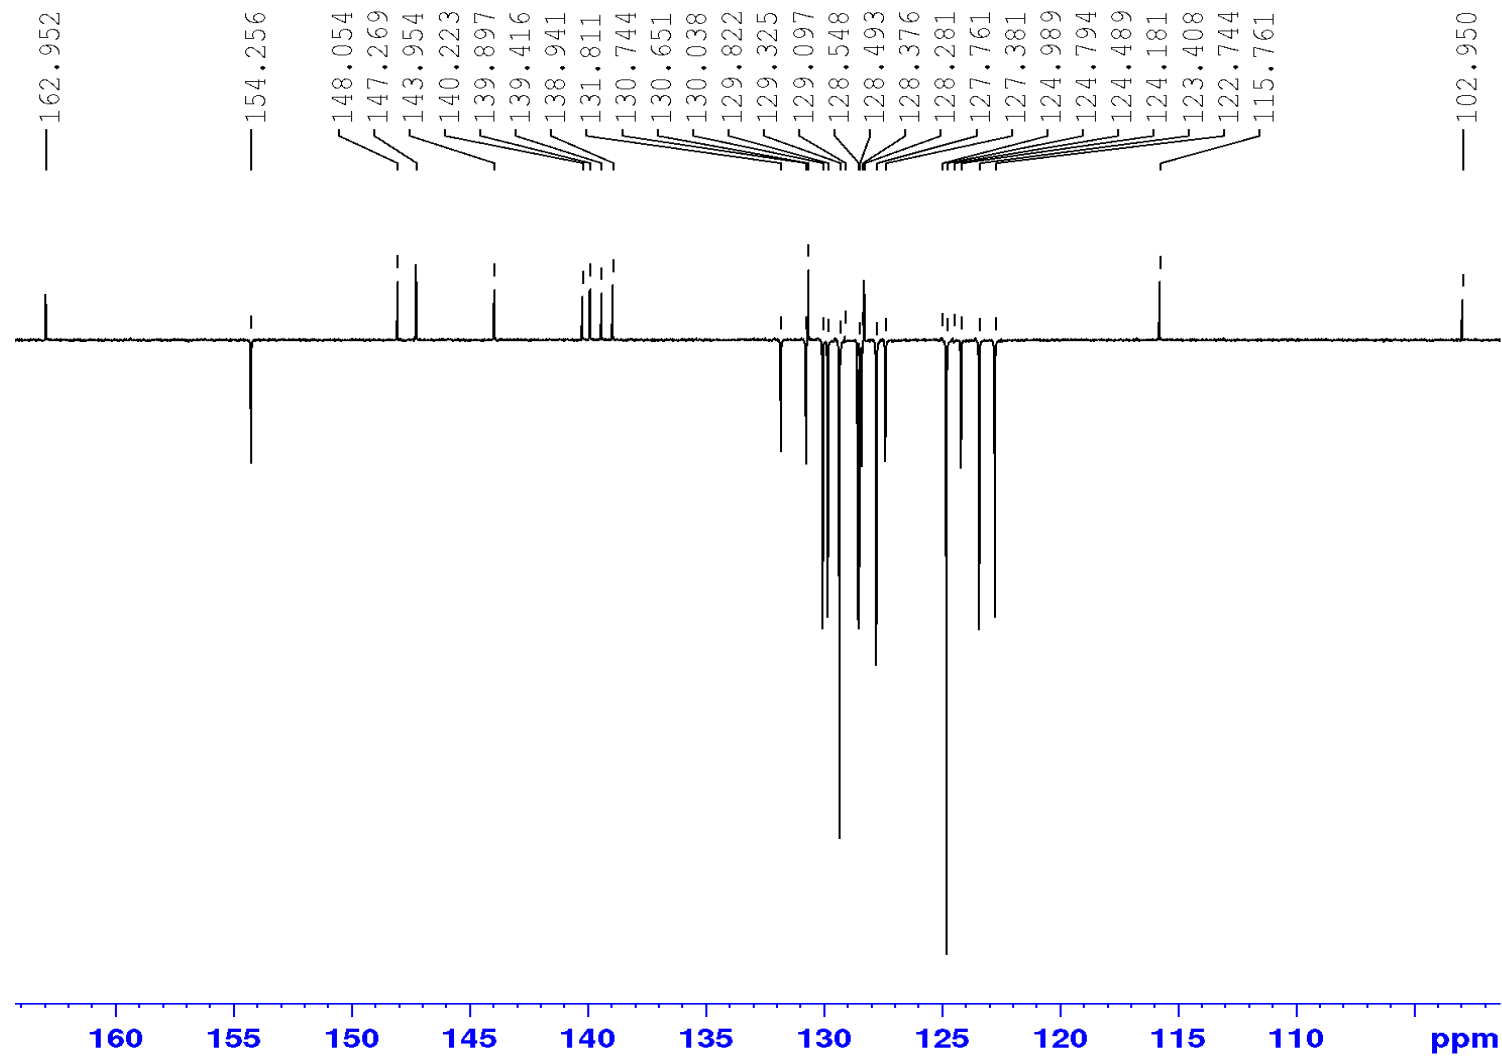

<sup>1</sup>H NMR spectrum of Dimethyl (E)-2-((5'-(4-(diphenylamino)styryl)-[1,1':4',1''-terphenyl]-2'-yl)methylene)malonate (DPA-DPS-DMV)

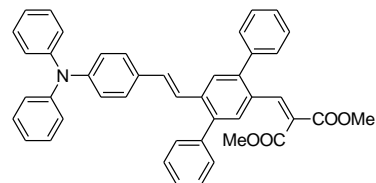

Current Data Parameters

NAME DPP  
EXPNO 150  
PROCNO 4

F2 - Acquisition Parameters

Date\_ 20210309  
Time 7.23  
INSTRUM spect  
PROBHD 5 mm CPPBBO BB  
PULPROG zg30  
TD 65536  
SOLVENT CD2C12  
NS 8  
DS 2  
SWH 10000.000 Hz  
FIDRES 0.152588 Hz  
AQ 3.2767999 sec  
RG 38.51  
DW 50.000 usec  
DE 10.00 usec  
TE 291.5 K  
D1 1.00000000 sec  
TD0 1

----- CHANNEL f1 -----

SFO1 500.2030889 MHz  
NUC1 1H  
P1 12.00 usec  
PLW1 13.00000000 W

F2 - Processing parameters

SI 65536  
SF 500.2000000 MHz  
WDW EM  
SSB 0  
LB 0.30 Hz  
GB 0  
PC 1.00

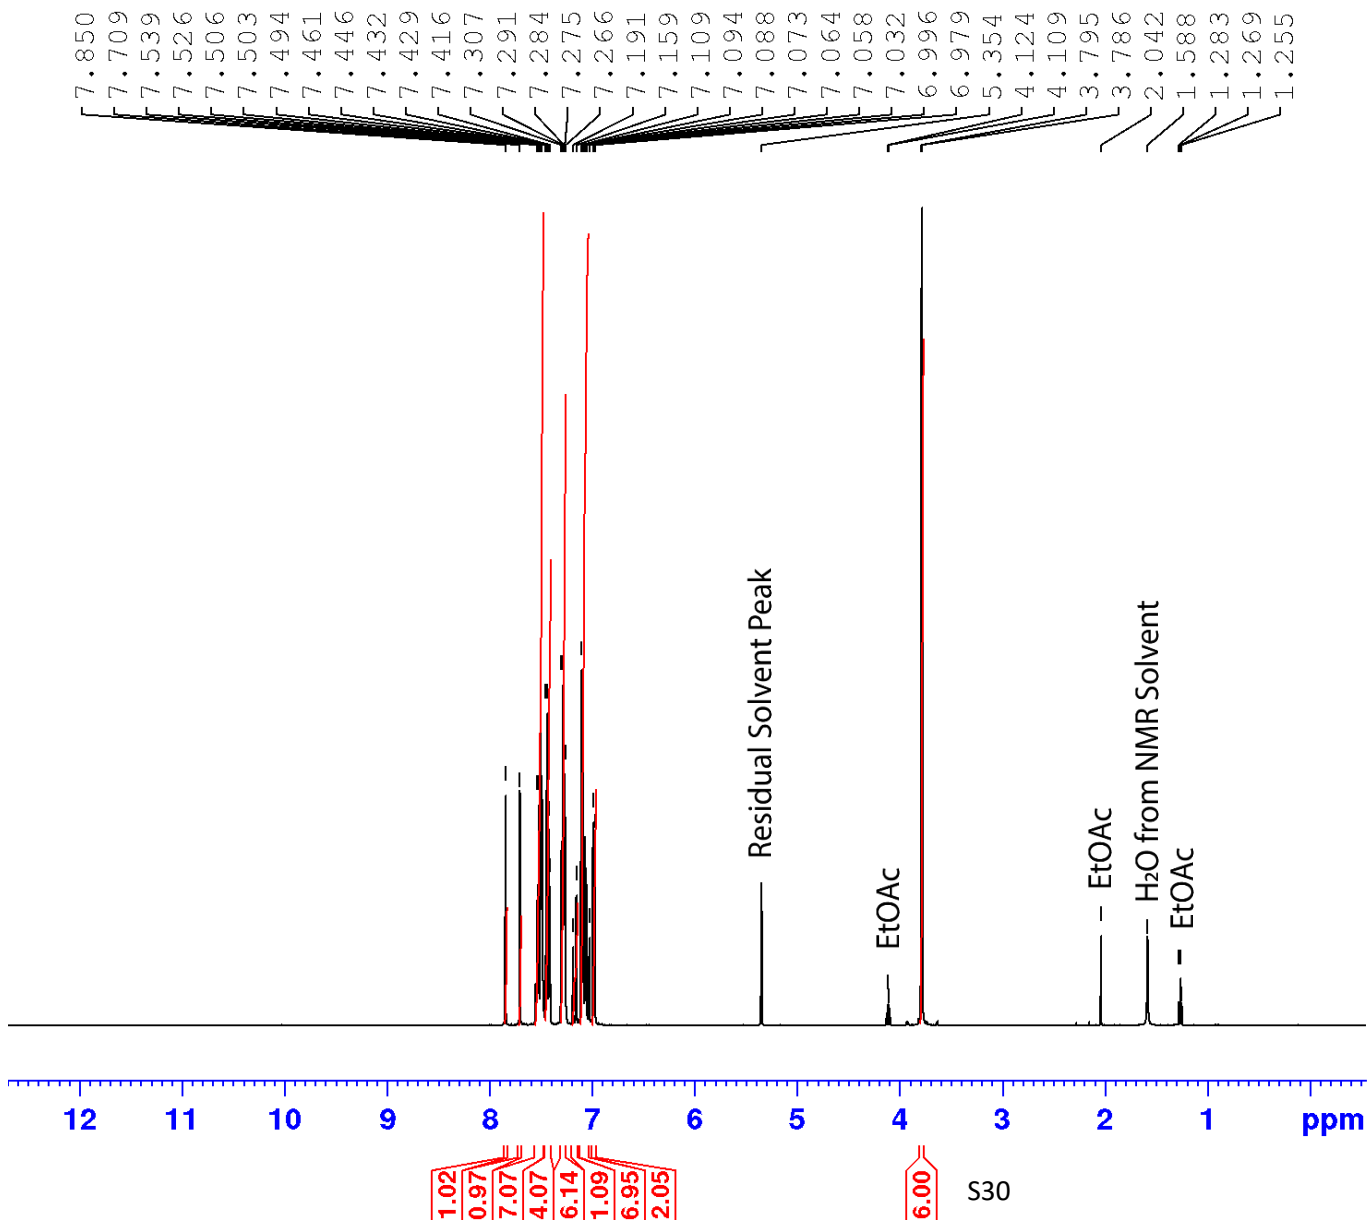

<sup>1</sup>H NMR spectrum of aromatic part of Dimethyl (E)-2-((5'-(4-(diphenylamino)styryl)-[1,1':4',1''-terphenyl]-2'-yl)methylene)malonate (DPA-DPS-DMV)

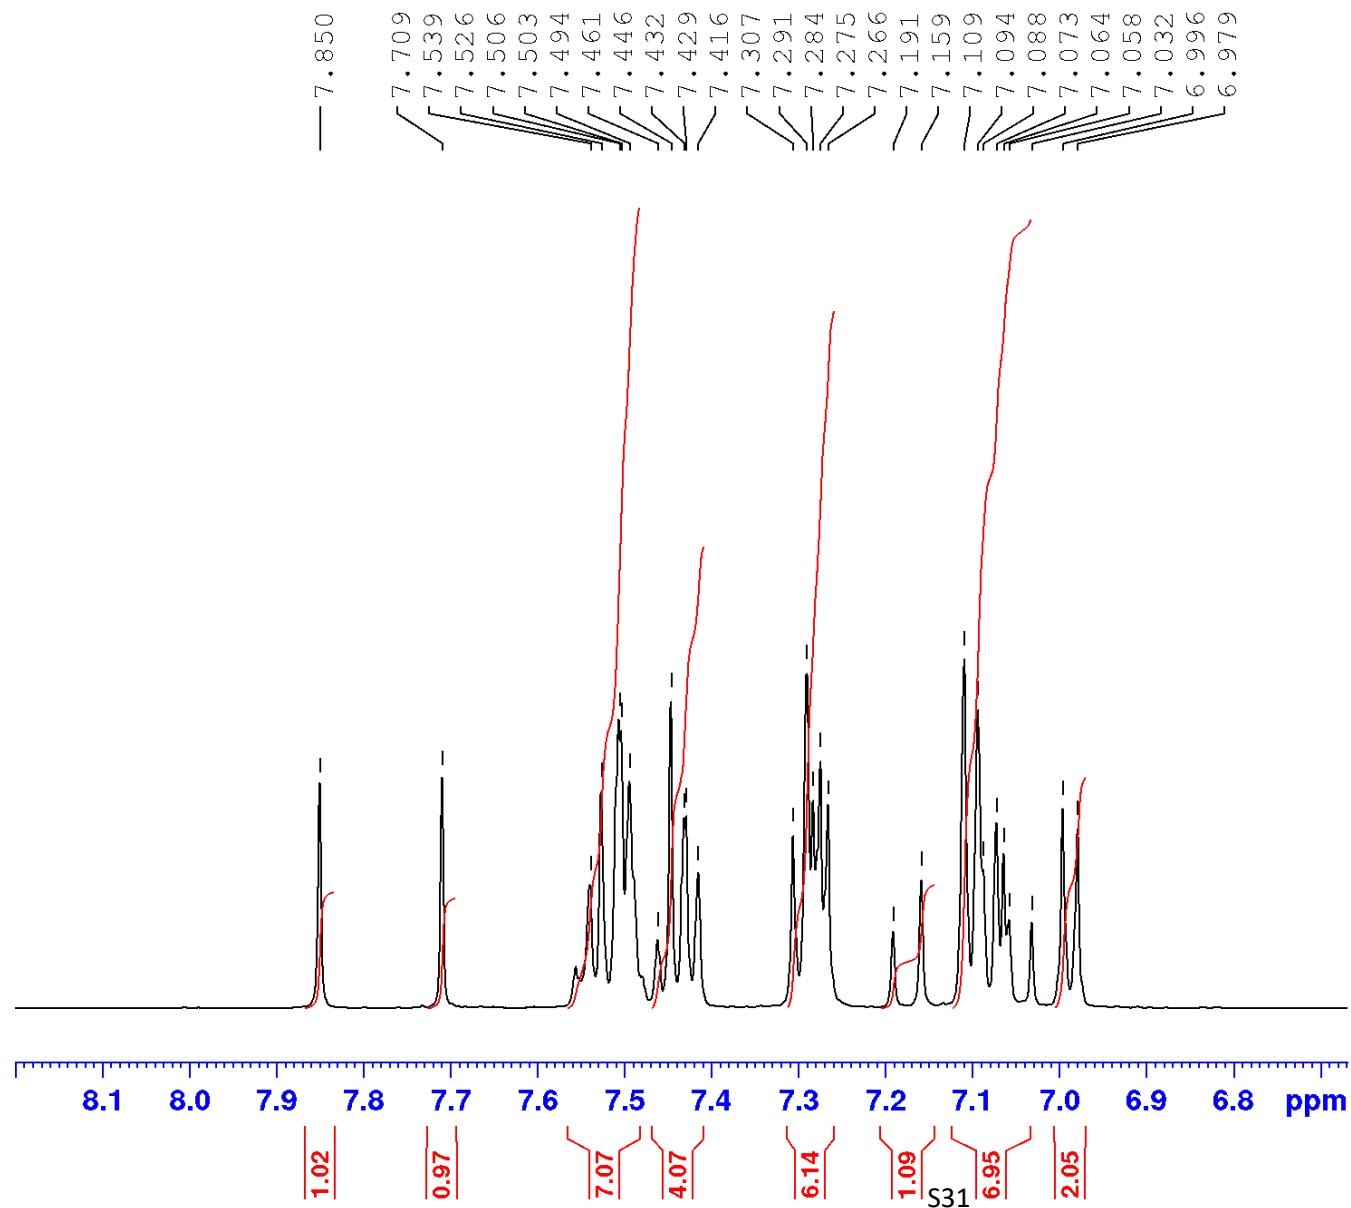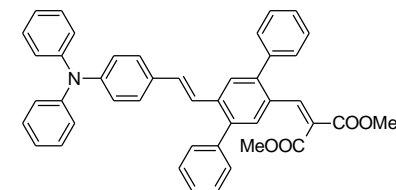

Current Data Parameters  
 NAME DPP  
 EXPNO 150  
 PROCNO 4

F2 - Acquisition Parameters  
 Date\_ 20210309  
 Time 7.23  
 INSTRUM spect  
 PROBHD 5 mm CPPBBO BB  
 PULPROG zg30  
 TD 65536  
 SOLVENT CD2Cl2  
 NS 8  
 DS 2  
 SWH 10000.000 Hz  
 FIDRES 0.152588 Hz  
 AQ 3.2767999 sec  
 RG 38.51  
 DW 50.000 usec  
 DE 10.00 usec  
 TE 291.5 K  
 D1 1.00000000 sec  
 TD0 1

===== CHANNEL f1 =====  
 SFO1 500.2030889 MHz  
 NUC1 1H  
 P1 12.00 usec  
 PLW1 13.00000000 W

F2 - Processing parameters  
 SI 65536  
 SF 500.2000000 MHz  
 WDW EM  
 SSB 0  
 LB 0.30 Hz  
 GB 0  
 PC 1.00

<sup>13</sup>C NMR spectrum of Dimethyl (E)-2-((5'-(4-(diphenylamino)styryl)-[1,1':4,1''-terphenyl]-2'-yl)methylene)malonate (DPA-DPS-DMV)

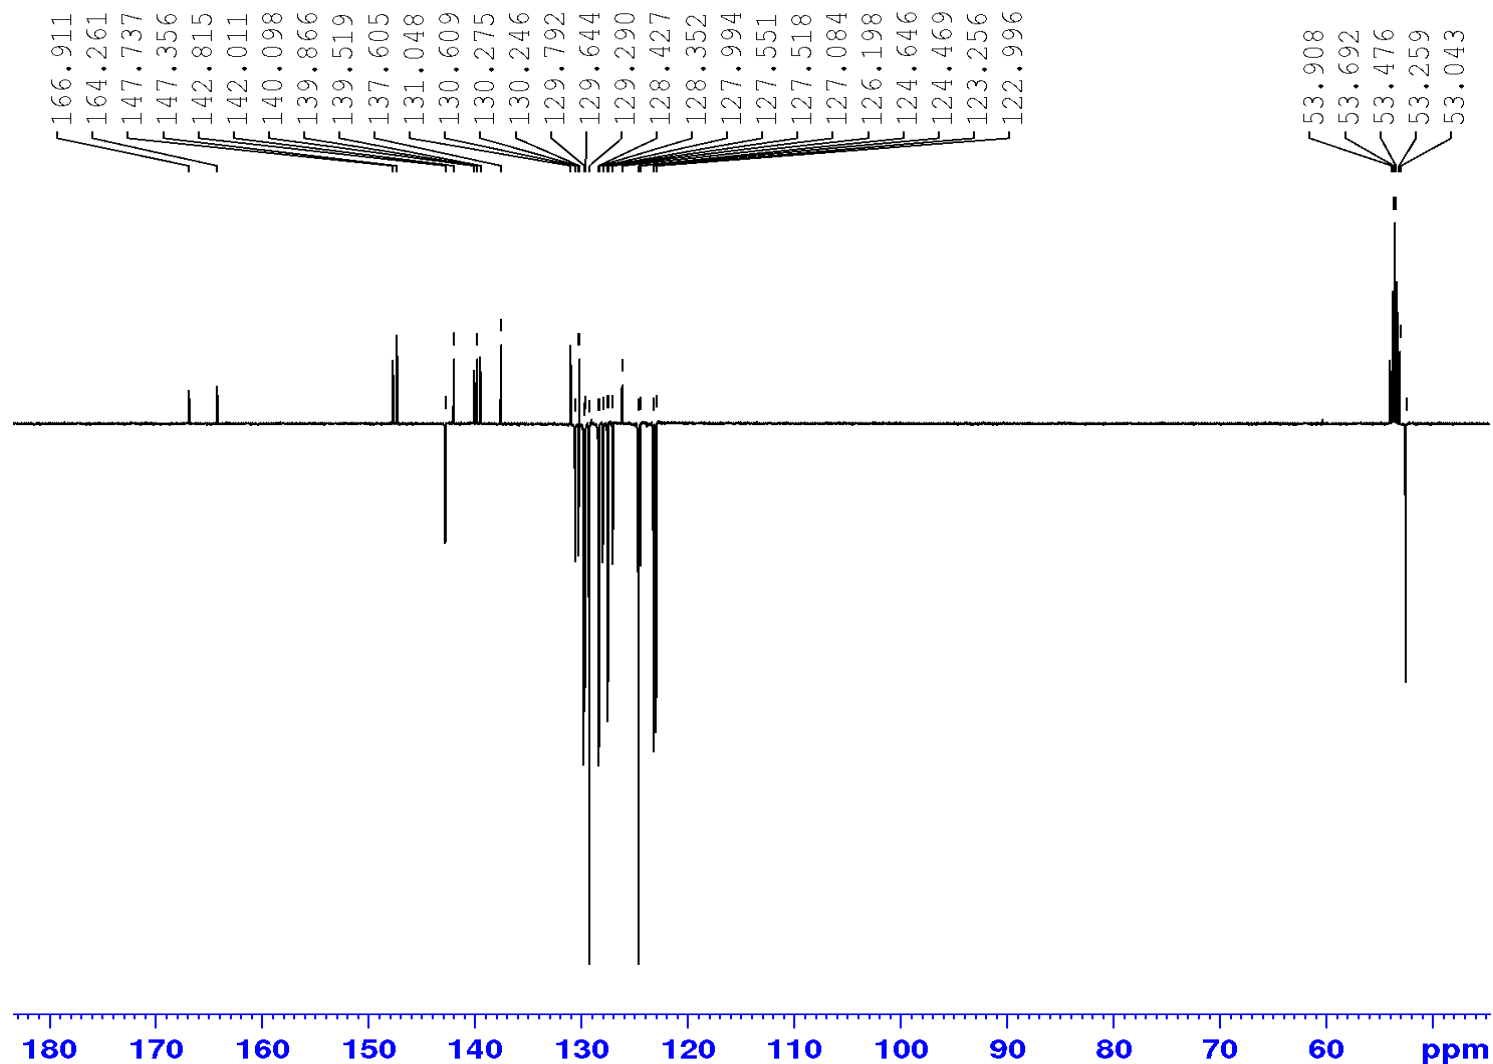

Current Data Parameters  
 NAME DPP  
 EXPNO 151  
 PROCNO 4

F2 - Acquisition Parameters  
 Date\_ 20210309  
 Time 7.24  
 INSTRUM spect  
 PROBHD 5 mm CPPBBO BB  
 PULPROG jmod  
 TD 65536  
 SOLVENT CD2Cl2  
 NS 785  
 DS 4  
 SWH 29761.904 Hz  
 FIDRES 0.454131 Hz  
 AQ 1.1010048 sec  
 RG 1820  
 DW 16.800 usec  
 DE 18.00 usec  
 TE 291.6 K  
 CNST2 145.0000000  
 CNST11 1.0000000  
 D1 2.00000000 sec  
 D20 0.00689655 sec  
 TD0 1

===== CHANNEL f1 =====  
 SFO1 125.7879676 MHz  
 NUC1 13C  
 P1 10.00 usec  
 P2 20.00 usec  
 PLW1 40.00000000 W

===== CHANNEL f2 =====  
 SFO2 500.2020008 MHz  
 NUC2 1H  
 CPDPRG[2] waltz16  
 PCPD2 80.00 usec  
 PLW2 13.00000000 W  
 PLW12 0.29249999 W

F2 - Processing parameters  
 SI 32768  
 SF 125.7753900 MHz  
 WDW EM  
 SSB 0  
 LB 1.00 Hz  
 GB 0  
 PC 1.40



<sup>13</sup>C NMR spectrum of Dimethyl (E)-2-((5'-(4-(diphenylamino)styryl)-[1,1':4',1''-terphenyl]-2'-yl)methylene)malonate (DPA-DPS-DMV)

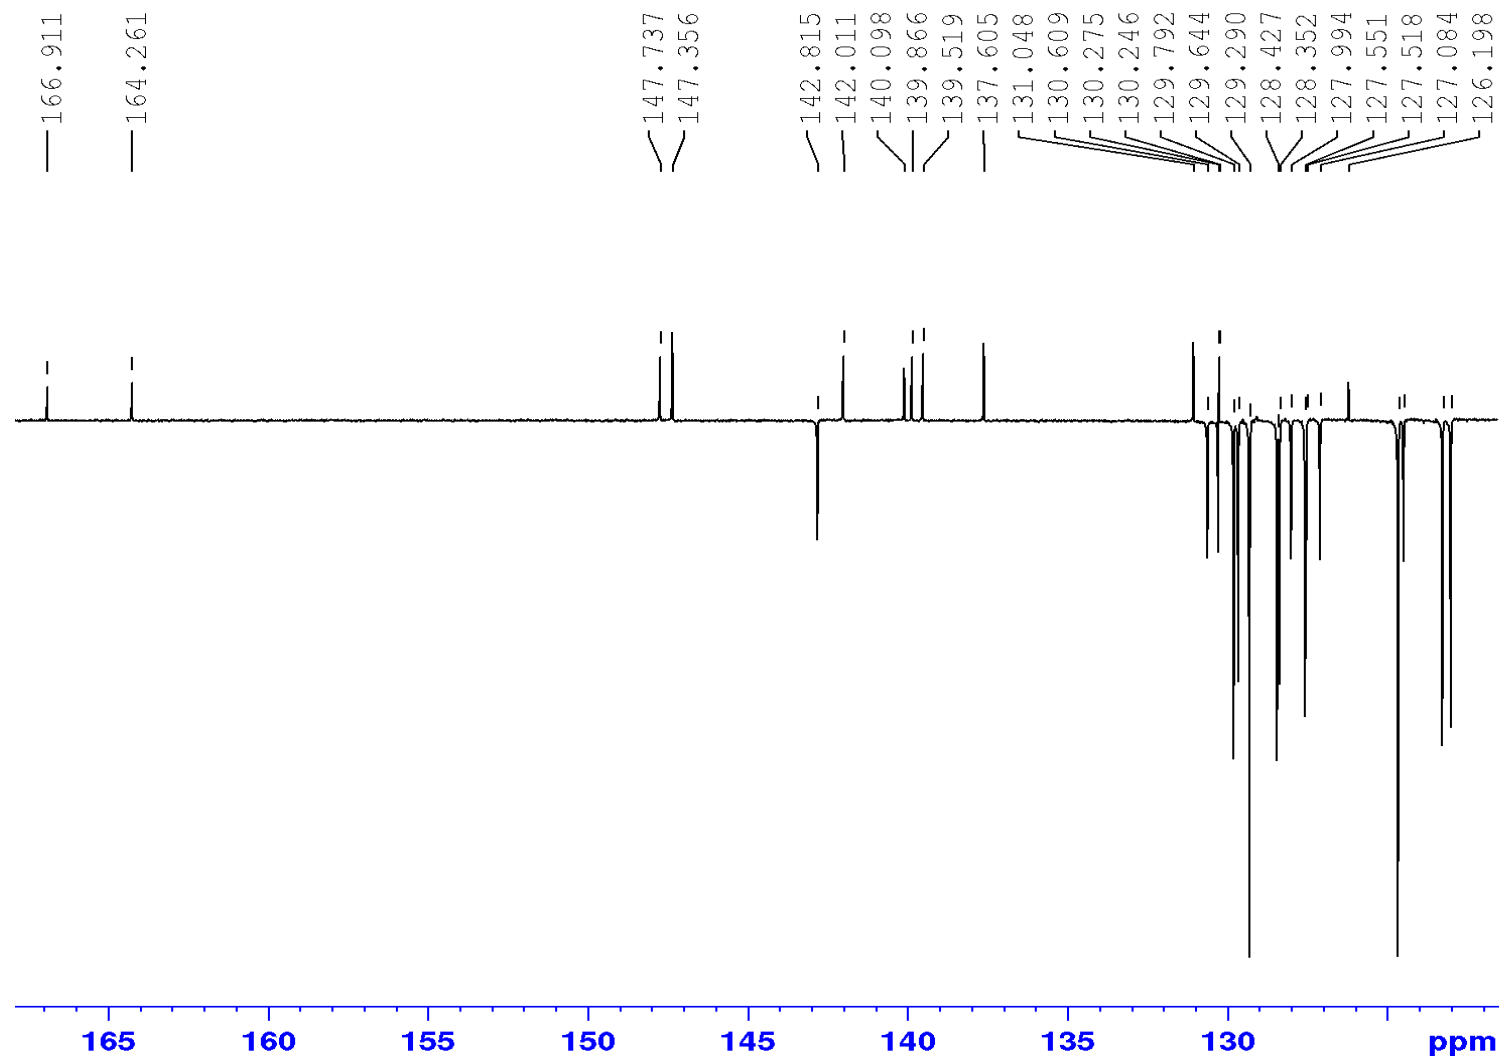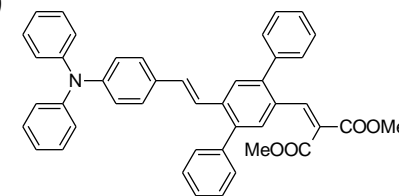

Current Data Parameters  
 NAME DPP  
 EXPNO 151  
 PROCNO 4

F2 - Acquisition Parameters  
 Date\_ 20210309  
 Time 7.24  
 INSTRUM spect  
 PROBHD 5 mm CPPBBO BB  
 PULPROG jmod  
 TD 65536  
 SOLVENT CD2Cl2  
 NS 785  
 DS 4  
 SWH 29761.904 Hz  
 FIDRES 0.454131 Hz  
 AQ 1.1010048 sec  
 RG 1820  
 DW 16.800 usec  
 DE 18.00 usec  
 TE 291.6 K  
 CNST2 145.000000  
 CNST11 1.0000000  
 D1 2.00000000 sec  
 D20 0.00689655 sec  
 TD0 1

==== CHANNEL f1 =====  
 SFO1 125.7879676 MHz  
 NUC1 13C  
 P1 10.00 usec  
 P2 20.00 usec  
 PLW1 40.00000000 W

==== CHANNEL f2 =====  
 SFO2 500.2020008 MHz  
 NUC2 1H  
 CPDPRG[2] waltz16  
 PCPD2 80.00 usec  
 PLW2 13.00000000 W  
 PLW12 0.29249999 W

F2 - Processing parameters  
 SI 32768  
 SF 125.7753900 MHz  
 WDW EM  
 SSB 0  
 LB 1.00 Hz  
 GB 0  
 PC 1.40



<sup>1</sup>H NMR spectrum of (*E*)-4-(2-(5'-(2,2-dibromovinyl)-[1,1':4,1''-terphenyl]-2'-yl)vinyl)-*N,N*-diphenylaniline (DPA-DPS-DBV)

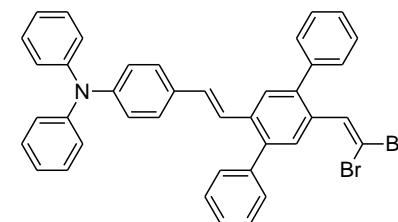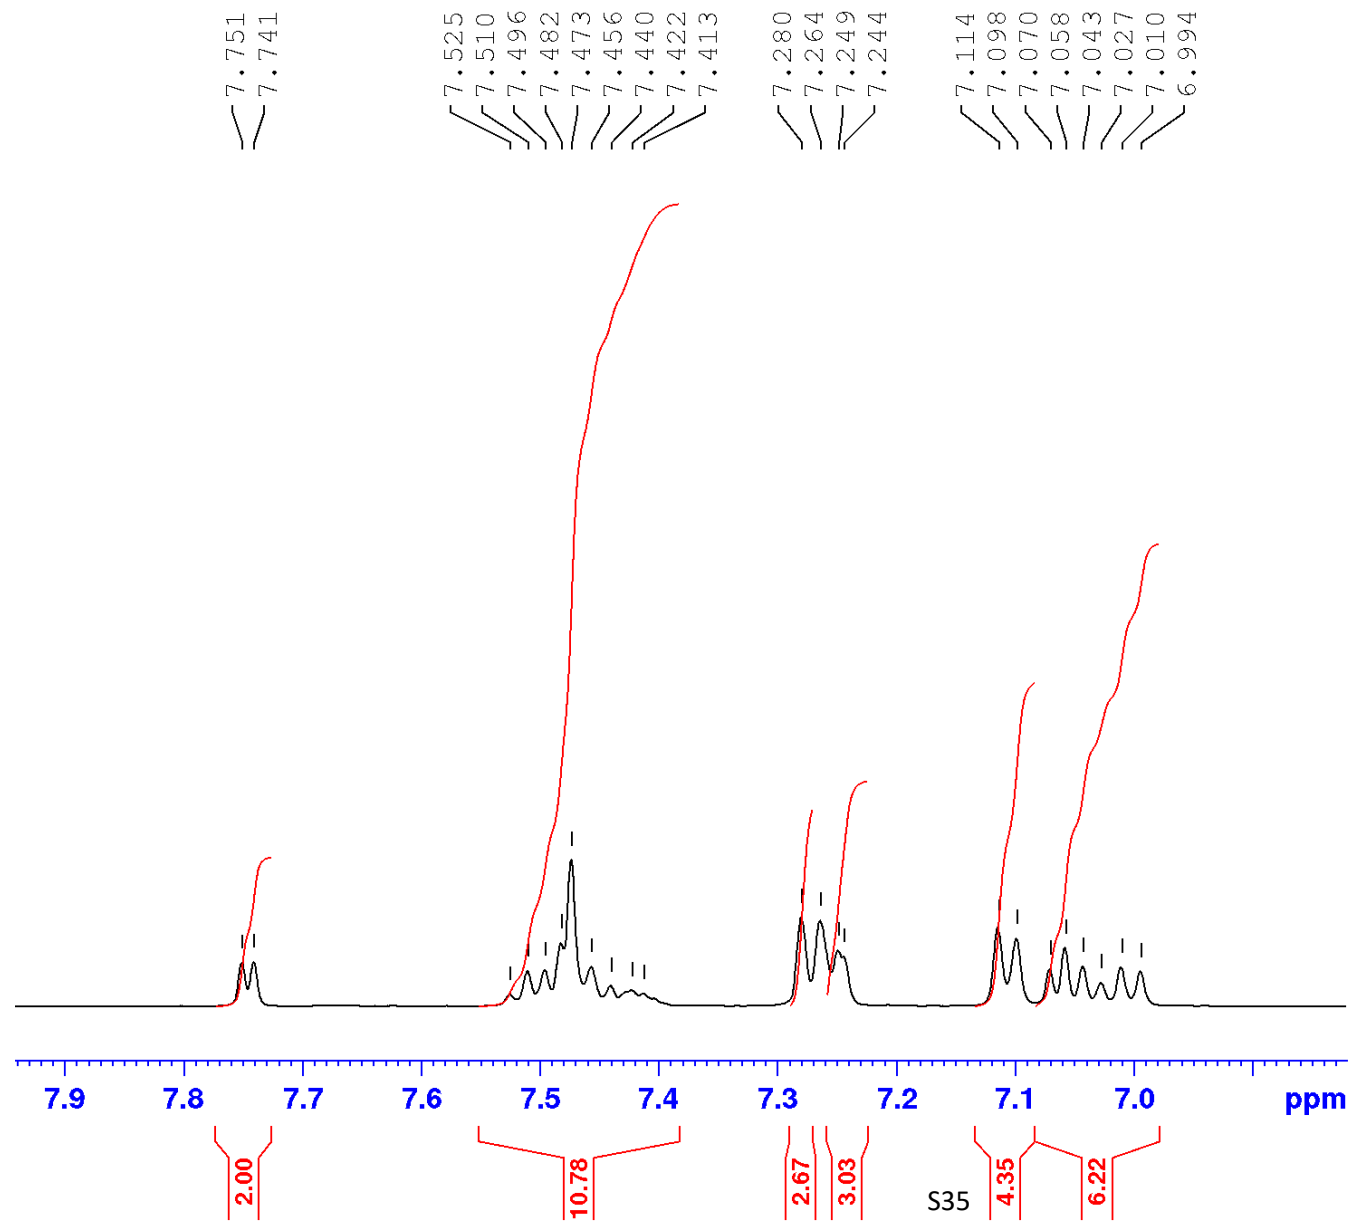

Current Data Parameters  
 NAME DPP  
 EXPNO 115  
 PROCNO 4

F2 - Acquisition Parameters  
 Date\_ 20200616  
 Time 11.23  
 INSTRUM spect  
 PROBHD 5 mm PATBI 1H/  
 PULPROG zg30  
 TD 65536  
 SOLVENT CDC13  
 NS 8  
 DS 2  
 SWH 10000.000 Hz  
 FIDRES 0.152588 Hz  
 AQ 3.2767999 sec  
 RG 131.1  
 DW 50.000 usec  
 DE 6.50 usec  
 TE 0 K  
 D1 1.00000000 sec  
 TD0 1

==== CHANNEL f1 =====  
 SFO1 500.2030889 MHz  
 NUC1 1H  
 P1 10.00 usec  
 PLW1 8.00000000 W

F2 - Processing parameters  
 SI 65536  
 SF 500.2000000 MHz  
 WDW EM  
 SSB 0  
 LB 0.30 Hz  
 GB 0  
 PC 1.00

<sup>13</sup>C NMR spectrum of (E)-4-(2-(5'-(2,2-dibromovinyl)-[1,1':4',1''-terphenyl]-2'-yl)vinyl)-N,N-diphenylaniline (DPA-DPS-DBV)

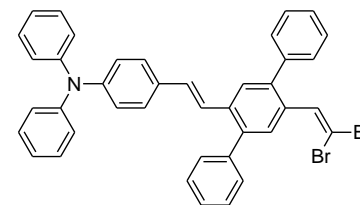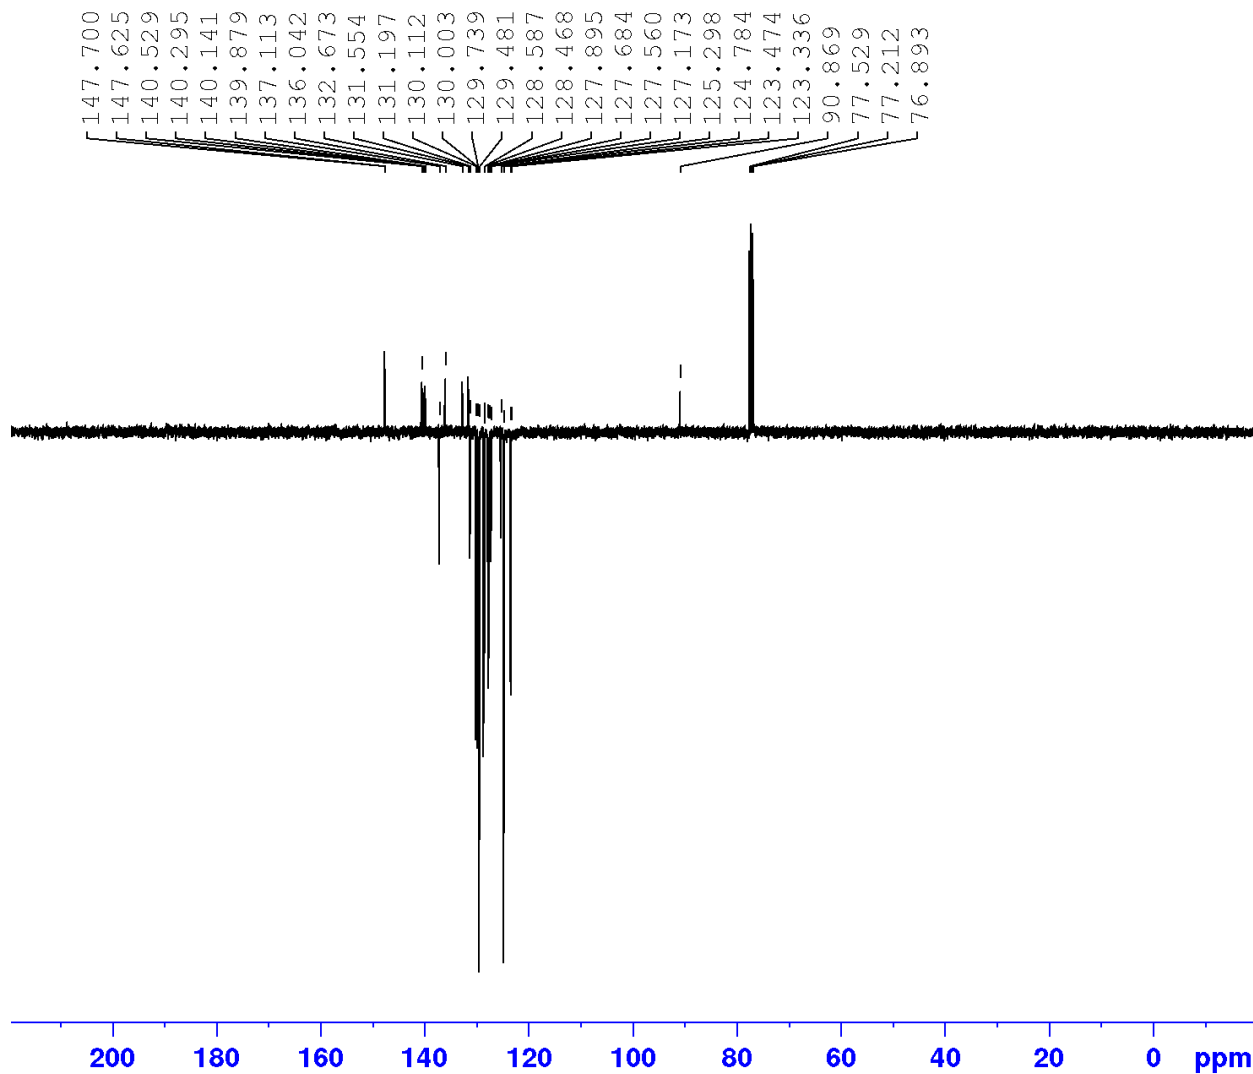

Current Data Parameters

NAME DPP  
EXPNO 307  
PROCNO 1

F2 - Acquisition Parameters

Date\_ 20200617  
Time 6.31  
INSTRUM spect  
PROBHD 5 mm PABBO BB-  
PULPROG jmod  
TD 65536  
SOLVENT CDCl3  
NS 1389  
DS 4  
SWH 24038.461 Hz  
FIDRES 0.366798 Hz  
AQ 1.3631488 sec  
RG 2050  
DW 20.800 usec  
DE 6.50 usec  
TE 296.1 K  
CNST2 145.000000  
CNST11 1.000000  
D1 2.00000000 sec  
D20 0.00689655 sec  
TD0 1

==== CHANNEL f1 =====

SFO1 100.6228298 MHz  
NUC1 13C  
P1 10.00 usec  
P2 20.00 usec  
PLW1 50.27999878 W

==== CHANNEL f2 =====

SFO2 400.1316005 MHz  
NUC2 1H  
CPDPRG[2] waltz16  
PCPD2 90.00 usec  
PLW2 26.98999977 W  
PLW12 0.33320999 W

F2 - Processing parameters

SI 32768  
SF 100.6127507 MHz  
WDW EM  
SSB 0  
LB 1.00 Hz  
GB 0  
PC 1.40

<sup>13</sup>C NMR spectrum of aromatic part of (*E*)-4-(2-(5'-(2,2-dibromovinyl)-[1,1':4',1''-terphenyl]-2'-yl)vinyl)-*N,N*-diphenylaniline (DPA-DPS-DBV)

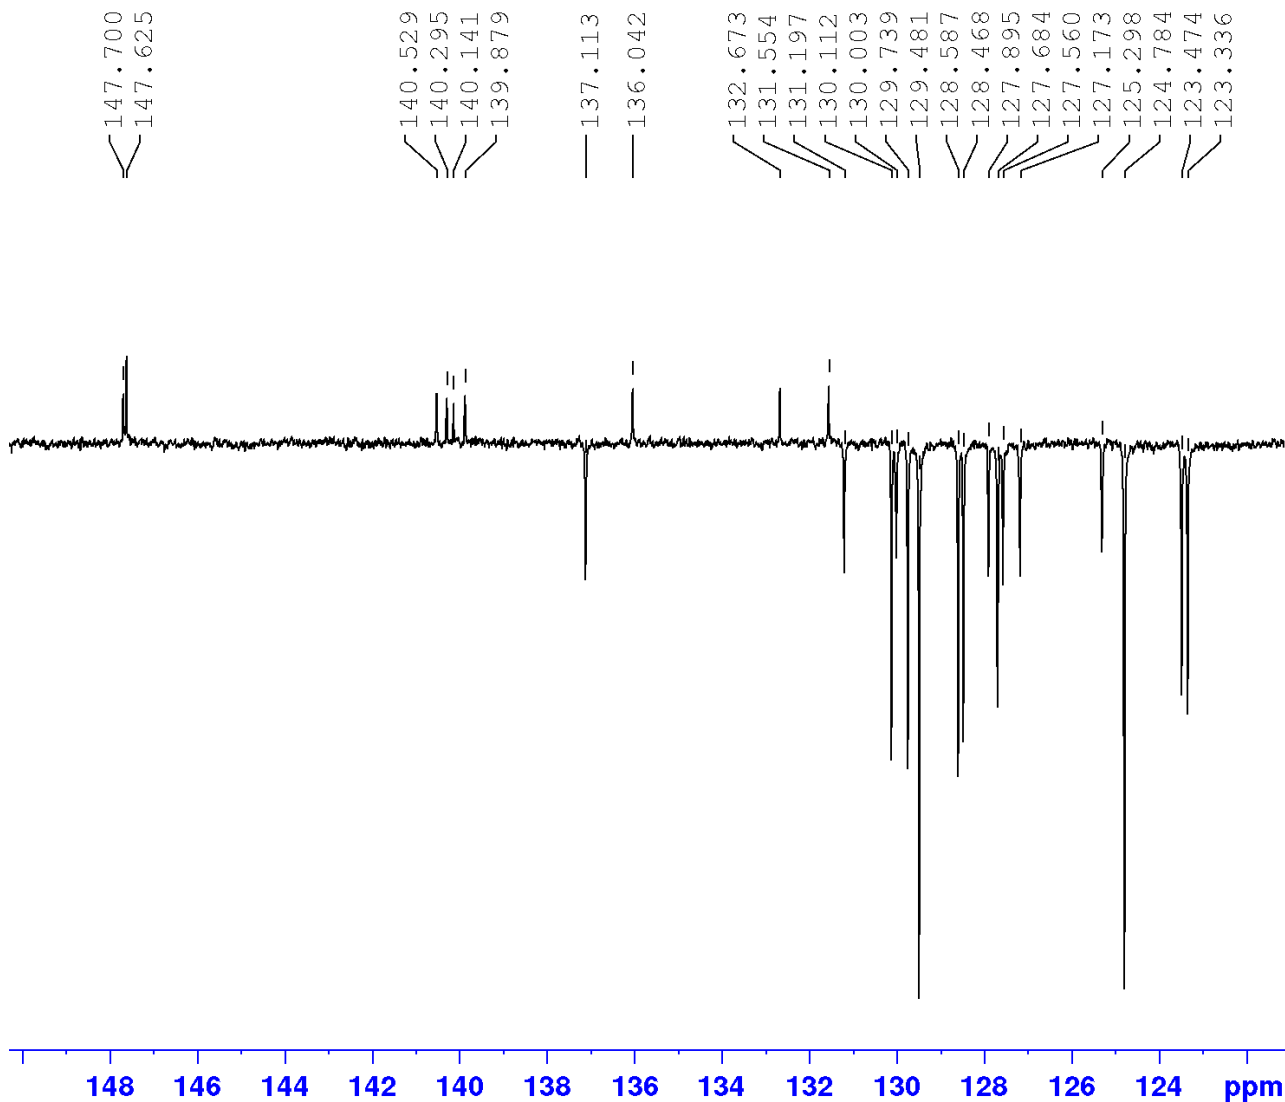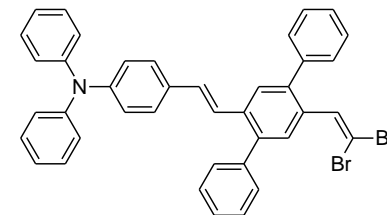

Current Data Parameters  
 NAME DPP  
 EXPNO 307  
 PROCNO 1

F2 - Acquisition Parameters  
 Date\_ 20200617  
 Time 6.31  
 INSTRUM spect  
 PROBHD 5 mm PABBO BB-  
 PULPROG jmod  
 TD 65536  
 SOLVENT CDCl3  
 NS 1389  
 DS 4  
 SWH 24038.461 Hz  
 FIDRES 0.366798 Hz  
 AQ 1.3631488 sec  
 RG 2050  
 DW 20.800 usec  
 DE 6.50 usec  
 TE 296.1 K  
 CNST2 145.0000000  
 CNST11 1.0000000  
 D1 2.0000000 sec  
 D20 0.00689655 sec  
 TD0 1

===== CHANNEL f1 =====  
 SFO1 100.6228298 MHz  
 NUC1 13C  
 P1 10.00 usec  
 P2 20.00 usec  
 PLW1 50.27999878 W

===== CHANNEL f2 =====  
 SFO2 400.1316005 MHz  
 NUC2 1H  
 CPDPRG[2] waltz16  
 PCPD2 90.00 usec  
 PLW2 26.98999977 W  
 PLW12 0.33320999 W

F2 - Processing parameters  
 SI 32768  
 SF 100.6127507 MHz  
 WDW EM  
 SSB 0  
 LB 1.00 Hz  
 GB 0  
 PC 1.40

## Electrochemical measurements

Electrochemical measurements were carried out in acetonitrile containing 0.1 M  $\text{Bu}_4\text{NPF}_6$  in a three-electrode cell by cyclic voltammetry (CV), and rotating disk voltammetry (RDV). The working electrode was a glassy carbon disk (3 mm in diameter) for CV and RDV experiments. A saturated calomel electrode (SCE) separated by a bridge filled with supporting electrolyte and Pt wire were used as the reference and auxiliary electrodes. All potentials are given vs. SCE. Voltammetric measurements were performed using a potentiostat PGSTAT 128N (AUTOLAB, Metrohm Autolab B.V., Utrecht, The Netherlands) operated via NOVA 1.11 software.

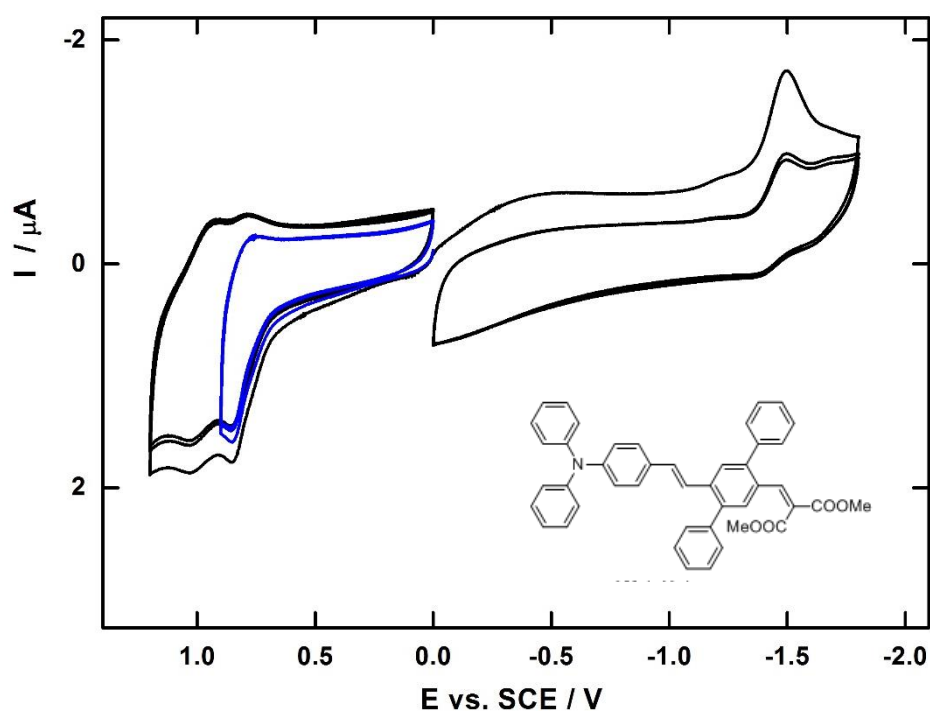

Representative CV curves of the oxidation and reduction of **DPA-DPS-DMV** at glassy carbon electrode in acetonitrile containing 0.1 M  $\text{Bu}_4\text{NPF}_6$ ;  $\nu = 100 \text{ mV}\cdot\text{s}^{-1}$ .

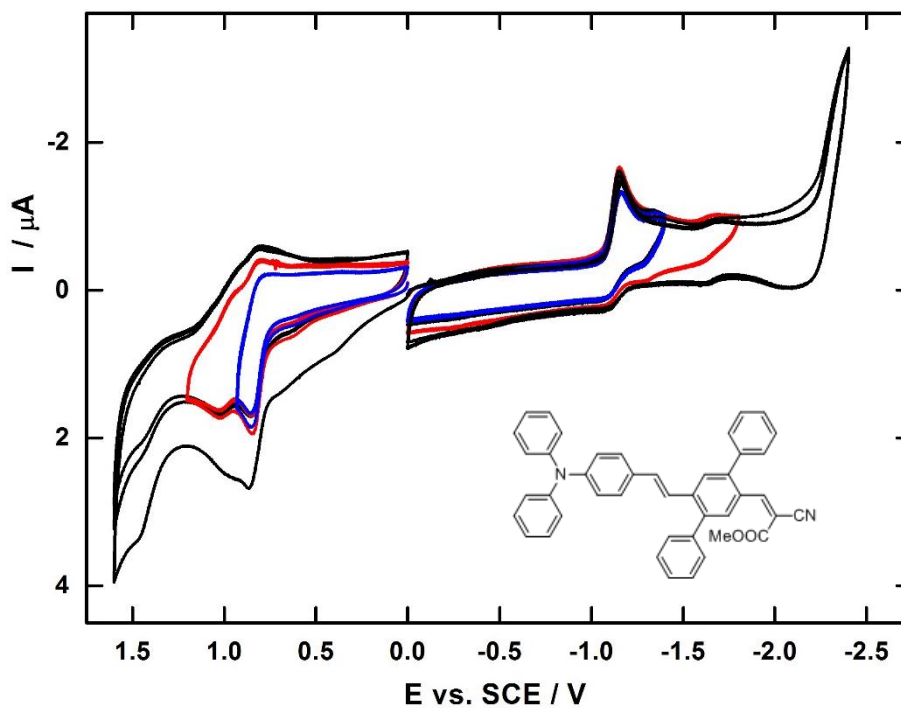

Representative CV curves of the oxidation and reduction of **DPA-DPS-CMV** at glassy carbon electrode in acetonitrile containing 0.1 M Bu<sub>4</sub>NPF<sub>6</sub>;  $\nu = 100 \text{ mV}\cdot\text{s}^{-1}$ .

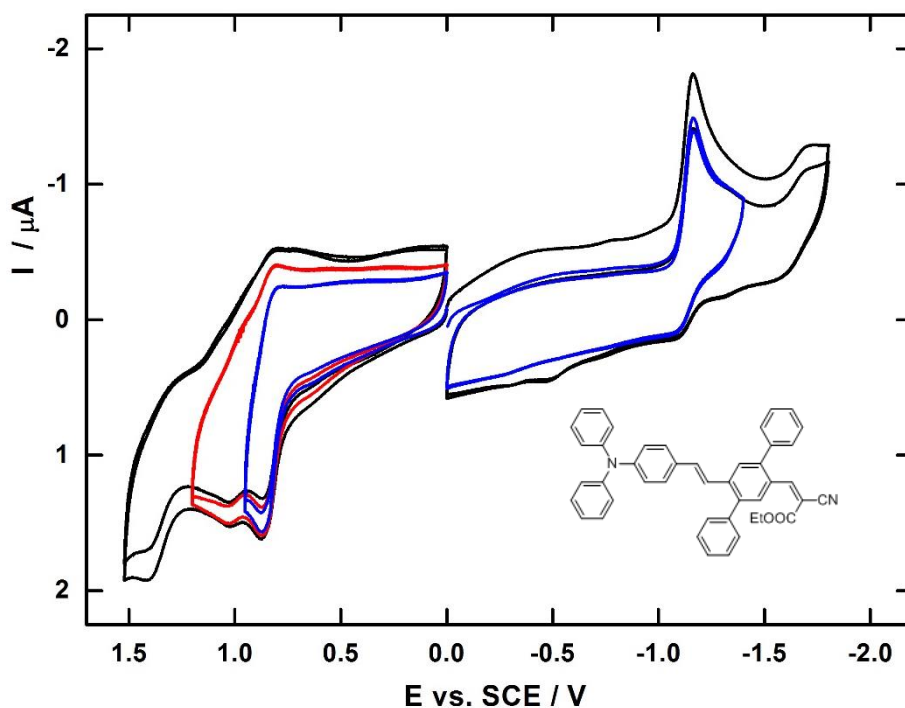

Representative CV curves of the oxidation and reduction of **DPA-DPS-CEV** compound at glassy carbon electrode in acetonitrile containing 0.1 M Bu<sub>4</sub>NPF<sub>6</sub>;  $\nu = 100 \text{ mV}\cdot\text{s}^{-1}$ .

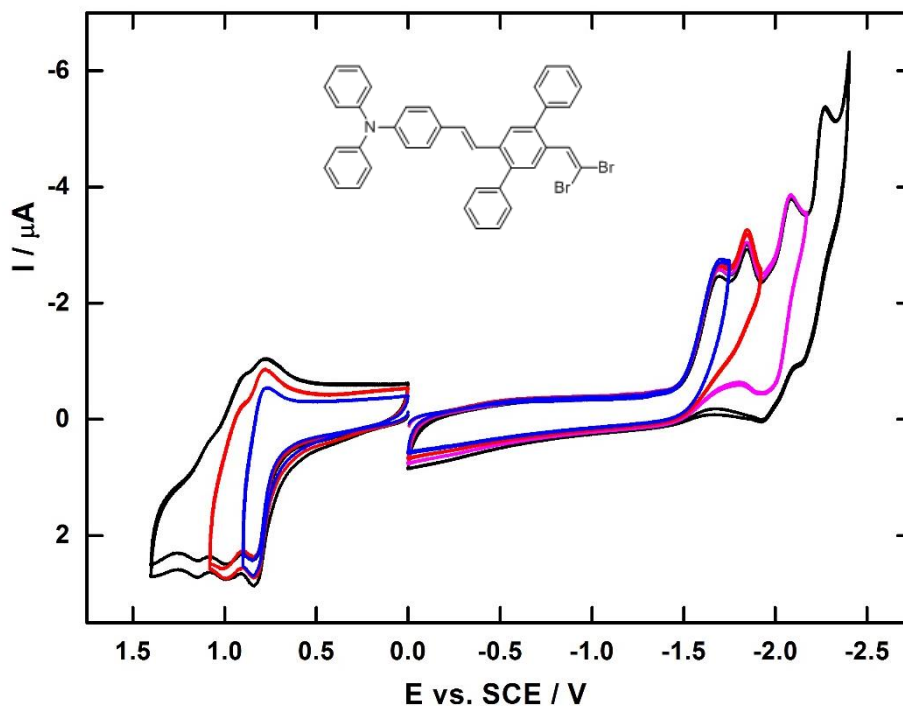

Representative CV curves of the oxidation and reduction of **DPA-DPS-DBV** compound at glassy carbon electrode in acetonitrile containing 0.1 M Bu<sub>4</sub>NPF<sub>6</sub>.;  $\nu = 100 \text{ mV}\cdot\text{s}^{-1}$ .

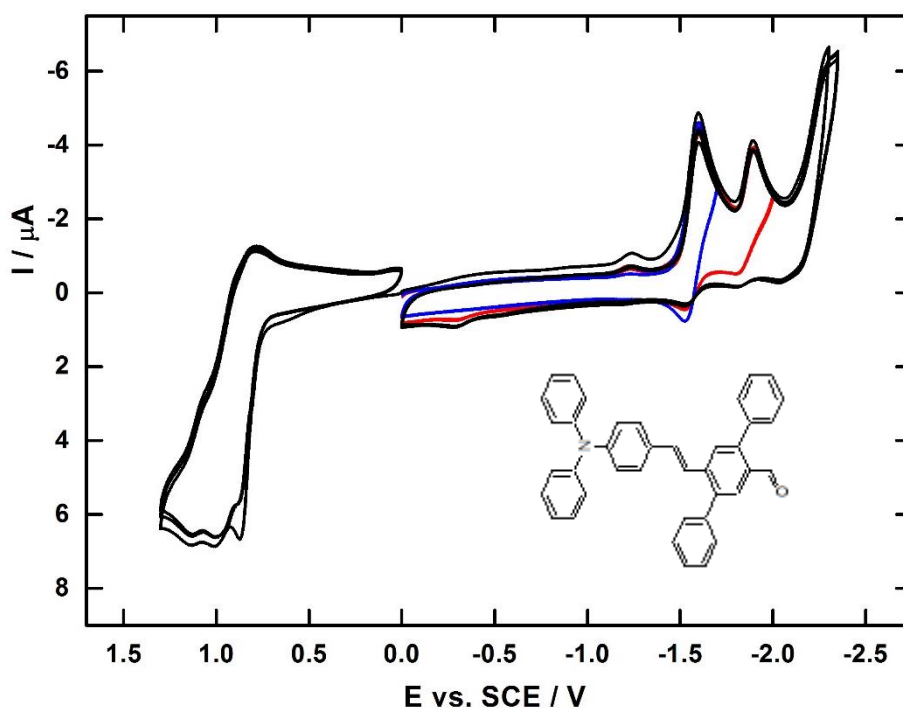

Representative CV curves of the oxidation and reduction of **DPA-DPS-CHO** compound at glassy carbon electrode in acetonitrile containing 0.1 M Bu<sub>4</sub>NPF<sub>6</sub>.;  $\nu = 100 \text{ mV}\cdot\text{s}^{-1}$ .



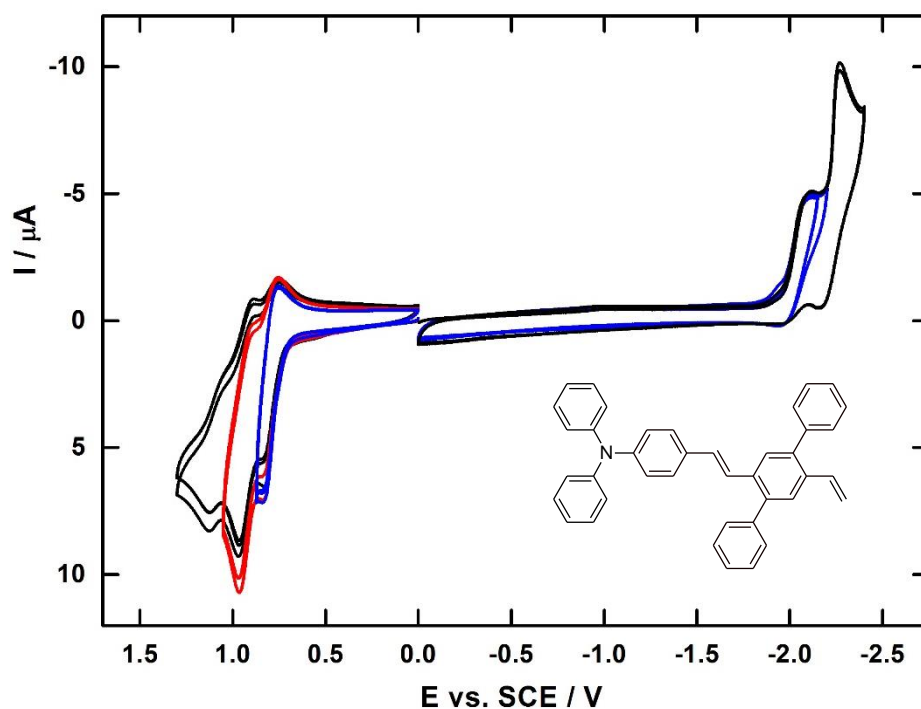

Representative CV curves of the oxidation and reduction of **DPA-DPS-V** compound at glassy carbon electrode in acetonitrile containing 0.1 M Bu<sub>4</sub>NPF<sub>6</sub>.;  $\nu = 100 \text{ mV}\cdot\text{s}^{-1}$ .

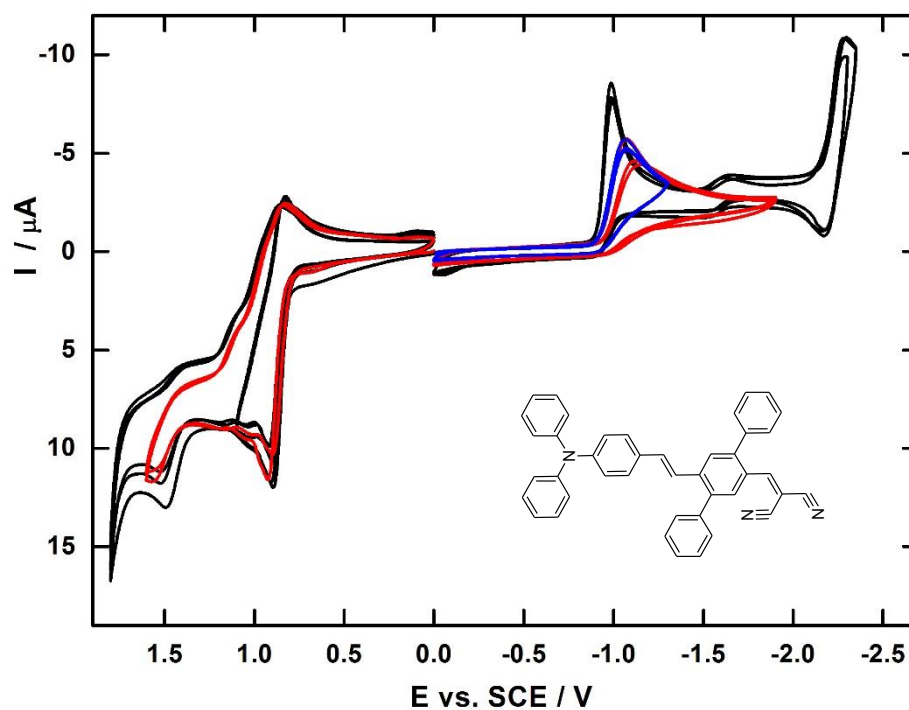

Representative CV curves of the oxidation and reduction of **DPA-DPS-DCV** compound at glassy carbon electrode in acetonitrile containing 0.1 M Bu<sub>4</sub>NPF<sub>6</sub>.;  $\nu = 100 \text{ mV}\cdot\text{s}^{-1}$ .

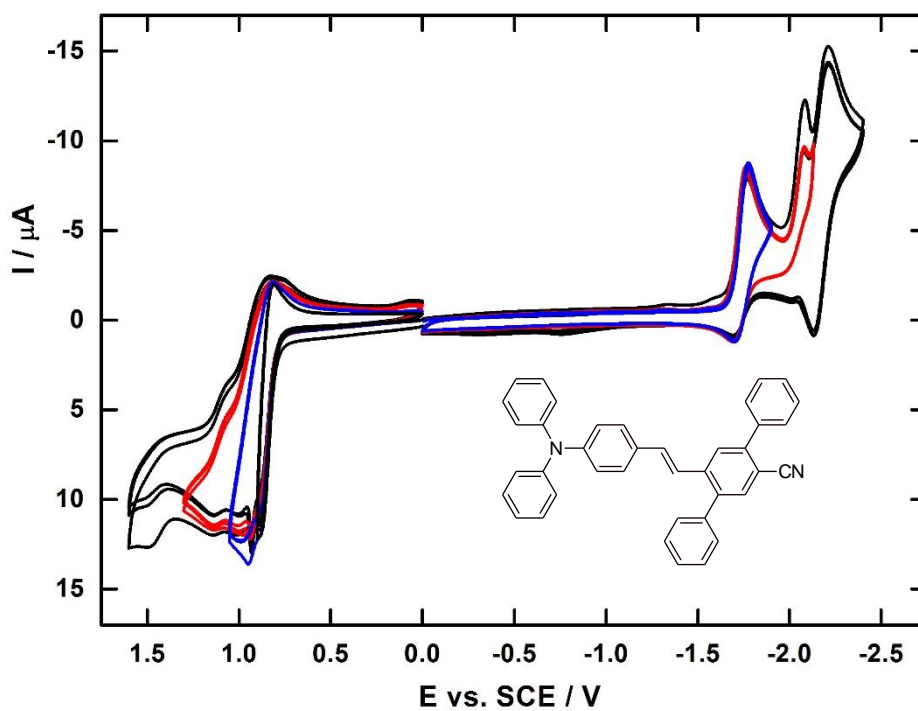

Representative CV curves of the oxidation and reduction of **DPA-DPS-CN** compound at glassy carbon electrode in acetonitrile containing 0.1 M  $\text{Bu}_4\text{NPF}_6$ ;  $v = 100 \text{ mV}\cdot\text{s}^{-1}$ .

## Single crystal XRD

Full-sets of diffraction data for **DPA-DPS-CMV** and **DPA-DPS-DMV** were collected at 150(2)K with a Bruker D8-Venture diffractometer equipped with Cu (Cu/K $\alpha$  radiation;  $\lambda$  = 1.54178 Å) or Mo (Mo/K $\alpha$  radiation;  $\lambda$  = 0.71073 Å) microfocus X-ray ( $I\mu$ S) sources, Photon CMOS detector and Oxford Cryosystems cooling device was used for data collection.

The frames were integrated with the Bruker SAINT software package using a narrow-frame algorithm. Data were corrected for absorption effects using the Multi-Scan method (SADABS). Obtained data were treated by XT-version 2017/1 and SHELXL-2014/7 software implemented in APEX3 v2017.1-0 (Bruker AXS) system [G. M. Sheldrick, SHELXT. *Acta Cryst.* 2015, A71, 3].

Hydrogen atoms were mostly localized on a difference Fourier map, however to ensure uniformity of treatment of crystal, all hydrogen were recalculated into idealized positions (riding model) and assigned temperature factors  $H_{iso}(H) = 1.2$  (1.5 for methyl)  $U_{eq}$  (pivot atom). H atoms in methyl, vinylidene moieties and hydrogen atoms in aromatic rings were placed with C-H distances of 0.98 and 0.95 Å.

$R_{int} = \sum |F_o^2 - F_{o,mean}^2| / \sum F_o^2$ ,  $GOF = [\sum(w(F_o^2 - F_c^2)^2) / (N_{diffrs} - N_{params})]^{1/2}$  for all data,  $R(F) = \sum ||F_o| - |F_c|| / \sum |F_o|$  for observed data,  $wR(F^2) = [\sum(w(F_o^2 - F_c^2)^2) / (\sum w(F_o^2)^2)]^{1/2}$  for all data.

Crystallographic data for structural analysis have been deposited with the Cambridge Crystallographic Data Centre, CCDC nos. 2118685-2118686. Copies of this information may be obtained free of charge from The Director, CCDC, 12 Union Road, Cambridge CB2 1EY, UK (fax: +44-1223-336033; e-mail: deposit@ccdc.cam.ac.uk or www: <http://www.ccdc.cam.ac.uk>).

Deposition Number 2118685-2118686

-----  
Summary of Data - Deposition Number 2118685  
-----

Compound Name:

Data Block Name: data\_ai20121402

Unit Cell Parameters: a 15.070(3) b 9.7398(13) c 22.418(3) P21/c  
-----

-----  
Summary of Data - Deposition Number 2118686  
-----

Compound Name:

Data Block Name: data\_ai21030104

Unit Cell Parameters: a 8.614(2) b 19.486(4) c 20.323(4) P212121  
-----

**Table S1:** Experimental details for **DPA-DPS-CMV**

| Crystal data                                                               |                                                                                                |
|----------------------------------------------------------------------------|------------------------------------------------------------------------------------------------|
| Chemical formula                                                           | C <sub>43</sub> H <sub>32</sub> N <sub>2</sub> O <sub>2</sub>                                  |
| $M_r$                                                                      | 608.70                                                                                         |
| Crystal system, space group                                                | Monoclinic, $P2_1/c$                                                                           |
| Temperature (K)                                                            | 150                                                                                            |
| $a, b, c$ (Å)                                                              | 15.070 (3), 9.7398 (13), 22.418 (3)                                                            |
| $\beta$ (°)                                                                | 97.637 (8)                                                                                     |
| $V$ (Å <sup>3</sup> )                                                      | 3261.3 (9)                                                                                     |
| $Z$                                                                        | 4                                                                                              |
| Radiation type                                                             | Mo $K\alpha$                                                                                   |
| $\mu$ (mm <sup>-1</sup> )                                                  | 0.08                                                                                           |
| Crystal size (mm)                                                          | 0.41 × 0.29 × 0.22                                                                             |
| Data collection                                                            |                                                                                                |
| Diffractometer                                                             | Bruker D8 - Venture                                                                            |
| Absorption correction                                                      | Multi-scan<br><i>SADABS2016/2</i> - Bruker AXS area detector scaling and absorption correction |
| $T_{\min}, T_{\max}$                                                       | 0.540, 0.746                                                                                   |
| No. of measured, independent and observed [ $I > 2\sigma(I)$ ] reflections | 39500, 6190, 4272                                                                              |
| $R_{\text{int}}$                                                           | 0.147                                                                                          |
| $(\sin \theta/\lambda)_{\text{max}}$ (Å <sup>-1</sup> )                    | 0.617                                                                                          |
| Refinement                                                                 |                                                                                                |
| $R[F^2 > 2\sigma(F^2)], wR(F^2), S$                                        | 0.104, 0.147, 1.19                                                                             |
| No. of reflections                                                         | 6190                                                                                           |
| No. of parameters                                                          | 425                                                                                            |
| H-atom treatment                                                           | H-atom parameters constrained                                                                  |
| $\Delta\rho_{\text{max}}, \Delta\rho_{\text{min}}$ (e Å <sup>-3</sup> )    | 0.25, -0.30                                                                                    |

Computer programs: Bruker Instrument Service vV6.2.3, *APEX3* v2016.5-0 (Bruker AXS), *SAINT* V8.37A (Bruker AXS Inc., 2015), *XT*, *VERSION* 2014/5, *SHELXL2014/7* (Sheldrick, 2014), *PLATON* (Spek, 2009).

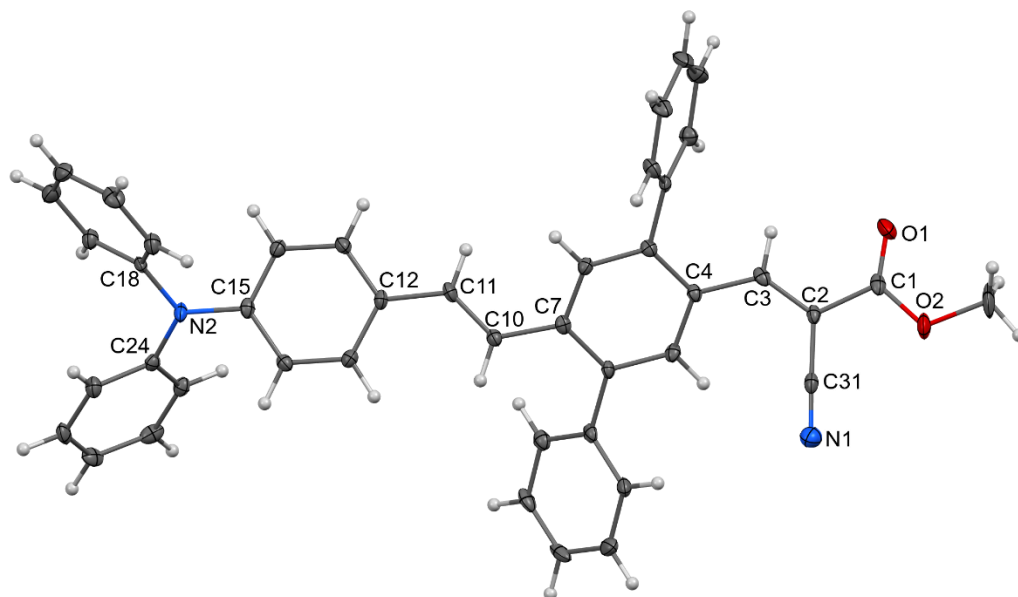

O1—C1 1.199 (4), N1—C31 1.140 (4), C1—O2 1.333 (4), N2—C15 1.410 (4), N2—C24 1.420 (4), N2—C18 1.427 (4), C2—C3 1.342 (4), C10—C11 1.332 (4), O1—C1—O2 124.5 (3), O1—C1—C2 123.8 (3), O2—C1—C2 111.7 (3), C2—C3—C4 130.0 (3), C3—C2—C1 118.6 (3), C3—C2—C31 124.2 (3).

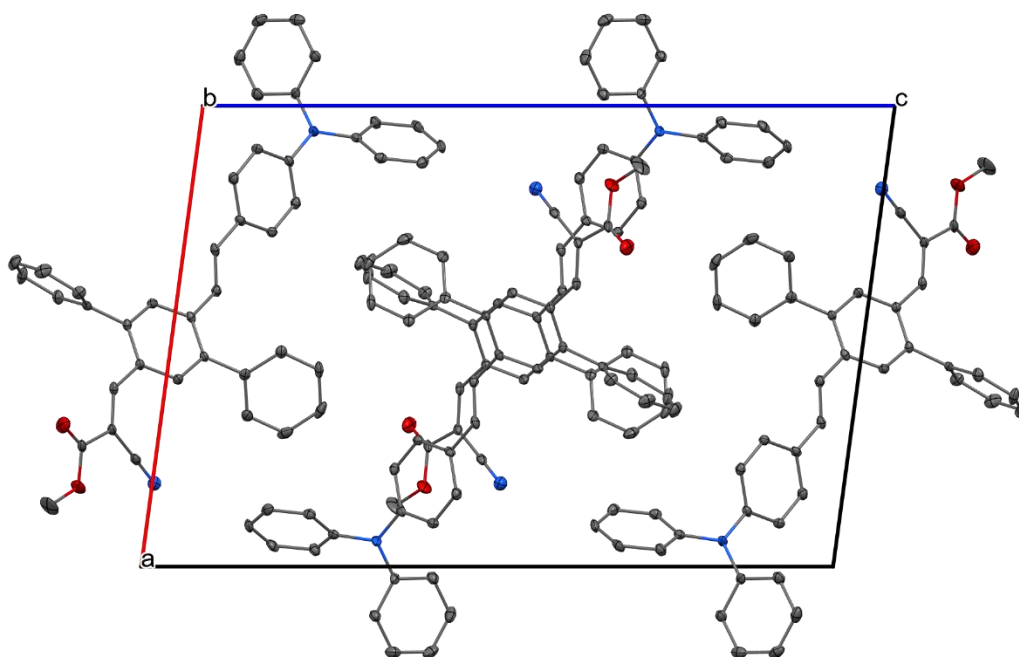

**Table S2:** Experimental details for **DPA-DPS-DMV**

| Crystal data                                                               |                                                                                                                                |
|----------------------------------------------------------------------------|--------------------------------------------------------------------------------------------------------------------------------|
| Chemical formula                                                           | C <sub>44</sub> H <sub>35</sub> NO <sub>4</sub>                                                                                |
| $M_r$                                                                      | 641.73                                                                                                                         |
| Crystal system, space group                                                | Orthorhombic, $P2_12_12_1$                                                                                                     |
| Temperature (K)                                                            | 150                                                                                                                            |
| $a, b, c$ (Å)                                                              | 8.614 (2), 19.486 (4), 20.323 (4)                                                                                              |
| $V$ (Å <sup>3</sup> )                                                      | 3411.2 (13)                                                                                                                    |
| $Z$                                                                        | 4                                                                                                                              |
| Radiation type                                                             | Mo $K\alpha$                                                                                                                   |
| $\mu$ (mm <sup>-1</sup> )                                                  | 0.08                                                                                                                           |
| Crystal size (mm)                                                          | 0.55 × 0.36 × 0.03                                                                                                             |
| Data collection                                                            |                                                                                                                                |
| Diffractometer                                                             | Bruker D8 - Venture                                                                                                            |
| Absorption correction                                                      | Multi-scan<br>SADABS2016/2 - Bruker AXS area detector scaling and absorption correction                                        |
| $T_{\min}, T_{\max}$                                                       | 0.632, 0.746                                                                                                                   |
| No. of measured, independent and observed [ $I > 2\sigma(I)$ ] reflections | 25860, 6525, 5003                                                                                                              |
| $R_{\text{int}}$                                                           | 0.103                                                                                                                          |
| $(\sin \theta/\lambda)_{\text{max}}$ (Å <sup>-1</sup> )                    | 0.617                                                                                                                          |
| Refinement                                                                 |                                                                                                                                |
| $R[F^2 > 2\sigma(F^2)], wR(F^2), S$                                        | 0.062, 0.097, 1.04                                                                                                             |
| No. of reflections                                                         | 6525                                                                                                                           |
| No. of parameters                                                          | 445                                                                                                                            |
| No. of restraints                                                          | 381                                                                                                                            |
| H-atom treatment                                                           | H-atom parameters constrained                                                                                                  |
| $\Delta\rho_{\text{max}}, \Delta\rho_{\text{min}}$ (e Å <sup>-3</sup> )    | 0.21, -0.19                                                                                                                    |
| Absolute structure                                                         | Flack $x$ determined using 1721 quotients [(I+)-(I-)]/[(I+)+(I-)] (Parsons, Flack and Wagner, Acta Cryst. B69 (2013) 249-259). |

Computer programs: Bruker Instrument Service vV6.2.3, *APEX3* v2016.5-0 (Bruker AXS), *SAINT* V8.37A (Bruker AXS Inc., 2015), *XT*, VERSION 2014/5, *SHELXL2014/7* (Sheldrick, 2014), *PLATON* (Spek, 2009).

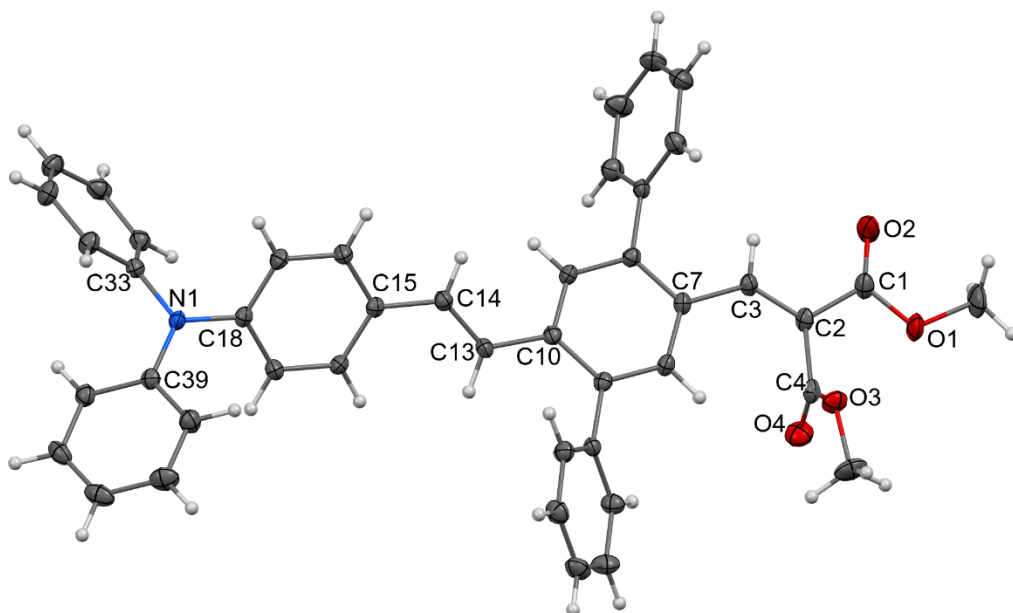

O1—C1 1.337 (4), O1—C5 1.451 (4), N1—C39 1.418 (4), N1—C33 1.419 (4), N1—C18 1.421 (4), C1—O2 1.206 (4), C2—C3 1.342 (4), O3—C4 1.332 (4), O3—C6 1.451 (4), C4—O4 1.204 (4), C13—C14 1.338 (4), O2—C1—O1 123.7 (3), O2—C1—C2 125.9 (3), O1—C1—C2 110.4 (3), C3—C2—C1 118.1 (3), C3—C2—C4 126.1 (3), C25—C24—C23 120.4 (3), C1—C2—C4 115.7 (3).

## Spectral and photophysical measurements

**Table S3:** Photophysical properties of DPA-DPS-V

|                 | $\lambda_A$<br>(nm) | $\lambda_A$<br>(eV) | $\varepsilon(\lambda_A) \times 10^3$<br>( $l \cdot \text{mol}^{-1} \cdot \text{cm}^{-1}$ ) | $\lambda_{PL}$<br>(nm) | $\lambda_{PL}$<br>(eV) | Stokes<br>(eV) | PLQY<br>(%) | $\tau$ (ns)       |
|-----------------|---------------------|---------------------|--------------------------------------------------------------------------------------------|------------------------|------------------------|----------------|-------------|-------------------|
| Toluene         | 387                 | 3.20                | 44.3(3)                                                                                    | 444                    | 2.79                   | 0.411          | 83(4)       | 1.43              |
| Chloroform      | 380                 | 3.26                | 41.0(1.1)                                                                                  | 469                    | 2.64                   | 0.619          | 56(1)       | 1.66              |
| Dichloromethane | 378                 | 3.28                | 29.4(1.2)                                                                                  | 483                    | 2.57                   | 0.713          | 83(3)       | 1.96              |
| Acetonitrile    | 378                 | 3.28                | 43.6(1)                                                                                    | 504                    | 2.46                   | 0.820          | 82(6)       | 2.29              |
| Solid state     | 440 <sup>b</sup>    | 2.82                | -                                                                                          | 475                    | 2.61                   | 0.208          | 12(1)       | 2.19 <sup>a</sup> |

<sup>a</sup> weighted average

<sup>b</sup> maximum of PL excitation spectrum.

**Table S4:** Photophysical properties of DPA-DPS-DBV

|                 | $\lambda_A$<br>(nm) | $\lambda_A$<br>(eV) | $\varepsilon(\lambda_A) \times 10^3$<br>( $l \cdot \text{mol}^{-1} \cdot \text{cm}^{-1}$ ) | $\lambda_{PL}$<br>(nm) | $\lambda_{PL}$<br>(eV) | Stokes<br>(eV) | PLQY<br>(%) | $\tau$ (ns)       |
|-----------------|---------------------|---------------------|--------------------------------------------------------------------------------------------|------------------------|------------------------|----------------|-------------|-------------------|
| Chloroform      | 388                 | 3.20                | 41.1(1)                                                                                    | 499                    | 2.48                   | 0.711          | 10(1)       | 0.12;1.23         |
| Dichloromethane | 386                 | 3.21                | 40.0(1.5)                                                                                  | 502                    | 2.47                   | 0.742          | 48(7)       | 1.64              |
| Solid state     | 463 <sup>b</sup>    | 2.68                | -                                                                                          | 498                    | 2.49                   | 0.188          | 11(1)       | 0.42 <sup>a</sup> |

<sup>a</sup> weighted average

<sup>b</sup> maximum of PL excitation spectrum.

**Table S5:** Photophysical properties of DPA-DPS-CN

|                 | $\lambda_A$<br>(nm) | $\lambda_A$<br>(eV) | $\varepsilon(\lambda_A) \times 10^3$<br>( $l \cdot \text{mol}^{-1} \cdot \text{cm}^{-1}$ ) | $\lambda_{PL}$<br>(nm) | $\lambda_{PL}$<br>(eV) | Stokes<br>(eV) | PLQY<br>(%) | $\tau$ (ns)       |
|-----------------|---------------------|---------------------|--------------------------------------------------------------------------------------------|------------------------|------------------------|----------------|-------------|-------------------|
| Chloroform      | 396                 | 3.13                | 21.1(2)                                                                                    | 517                    | 2.40                   | 0.733          | 44(1)       | 1.59              |
| Dichloromethane | 393                 | 3.16                | 18.0(2)                                                                                    | 530                    | 2.34                   | 0.816          | 62(4)       | 1.98              |
| Solid state     | 481 <sup>b</sup>    | 2.58                | -                                                                                          | 529                    | 2.34                   | 0.234          | 18(2)       | 2.38 <sup>a</sup> |

<sup>a</sup> weighted average

<sup>b</sup> maximum of PL excitation spectrum.

**Table S7:** Photophysical properties of DPA-DPS-DMV

|                 | $\lambda_A$<br>(nm) | $\lambda_A$<br>(eV) | $\varepsilon(\lambda_A) \times 10^3$<br>( $l \cdot \text{mol}^{-1} \cdot \text{cm}^{-1}$ ) | $\lambda_{PL}$<br>(nm) | $\lambda_{PL}$<br>(eV) | Stokes<br>(eV) | PLQY<br>(%) | $\tau$ (ns)       |
|-----------------|---------------------|---------------------|--------------------------------------------------------------------------------------------|------------------------|------------------------|----------------|-------------|-------------------|
| Chloroform      | 407                 | 3.05                | 36.9(6)                                                                                    | 627                    | 1.98                   | 1.069          | 21(2)       | 0.53              |
| Dichloromethane | 406                 | 3.05                | 29.9(1.3)                                                                                  | 663                    | 1.87                   | 1.184          | 46(4)       | 1.45              |
| Solid state     | 516 <sup>b</sup>    | 2.4                 | -                                                                                          | 574                    | 2.16                   | 0.243          | 20(3)       | 3.12 <sup>a</sup> |

<sup>a</sup> weighted average

<sup>b</sup> maximum of PL excitation spectrum.



**Table S8:** Photophysical properties of DPA-DPS-CEV

|                 | $\lambda_A$<br>(nm) | $\lambda_A$<br>(eV) | $\varepsilon(\lambda_A) \times 10^3$<br>( $l \cdot \text{mol}^{-1} \cdot \text{cm}^{-1}$ ) | $\lambda_{PL}$<br>(nm) | $\lambda_{PL}$<br>(eV) | Stokes<br>(eV) | PLQY<br>(%) | $\tau$ (ns)       |
|-----------------|---------------------|---------------------|--------------------------------------------------------------------------------------------|------------------------|------------------------|----------------|-------------|-------------------|
| Toluene         | 443                 | 2.80                | 28.9(1)                                                                                    | 579                    | 2.14                   | 0.657          | 98(7)       | -                 |
| Chloroform      | 447                 | 2.77                | 30(1)                                                                                      | 664                    | 1.87                   | 0.907          | 97(7)       | 3.05              |
| Dichloromethane | 442                 | 2.81                | 27.9(7)                                                                                    | 716                    | 1.73                   | 1.074          | 58(5)       | 2.03              |
| Solid state     | 556 <sup>b</sup>    | 2.23                | -                                                                                          | 627                    | 1.98                   | 0.253          | 9(1)        | 1.90 <sup>a</sup> |

<sup>a</sup> weighted average<sup>b</sup> maximum of PL excitation spectrum.**Table S9:** Photophysical properties of DPA-DPS-CMV

|                 | $\lambda_A$<br>(nm) | $\lambda_A$<br>(eV) | $\varepsilon(\lambda_A) \times 10^3$<br>( $l \cdot \text{mol}^{-1} \cdot \text{cm}^{-1}$ ) | $\lambda_{PL}$<br>(nm) | $\lambda_{PL}$<br>(eV) | Stokes<br>(eV) | PLQY<br>(%) | $\tau$ (ns)        |
|-----------------|---------------------|---------------------|--------------------------------------------------------------------------------------------|------------------------|------------------------|----------------|-------------|--------------------|
| Chloroform      | 452                 | 2.74                | 32.5(5)                                                                                    | 673                    | 1.84                   | 0.901          | 100(9)      | 3.05               |
| Dichloromethane | 445                 | 2.79                | 28.2(9)                                                                                    | 729                    | 1.70                   | 1.086          | 44(3)       | 1.85               |
| Solid state     | 564 <sup>b</sup>    | 2.20                | -                                                                                          | 637                    | 1.95                   | 0.252          | 35(4)       | 10.05 <sup>a</sup> |

<sup>a</sup> weighted average<sup>b</sup> maximum of PL excitation spectrum.
